# Supplementary material for: Shank3 modulates sleep and expression of circadian transcription factors
Source: eLife journal article supplement (doi:10.7554/elife.42819), 2019-04-11
Supplement: supp [file elife-42819-supp-v1.zip]

Archive with 17 entries (17 files):
- elife_poa_e42819_Figure_1_source_data_1.xlsx
- elife_poa_e42819_Figure_2_figure_supplement_1.pdf
- elife_poa_e42819_Figure_4_source_data_1.xlsx
- elife_poa_e42819_Transparent_Reporting_File.docx
- elife_poa_e42819_Figure_3_source_data_1.xlsx
- elife_poa_e42819_Figure_3_figure_supplement_2.pdf
- elife_poa_e42819_Figure_4_figure_supplement_1.pdf
- elife_poa_e42819_Figure_2_source_data_1.xlsx
- elife_poa_e42819_Figure_5_figure_supplement_1.pdf
- elife_poa_e42819_Figure_2_source_data_2.xls
- elife_poa_e42819_Figure_3_source_data_2.xls
- elife_poa_e42819_Supplementary_file_1_source_data_1.xlsx
- elife_poa_e42819_Figure_3_figure_supplement_1.pdf
- elife_poa_e42819_Table_2_source_data_1.xlsx
- elife_poa_e42819_Table_3_source_data_1.xlsx
- elife_poa_e42819_Source_code_1.pdf
- elife_poa_e42819_Supplementary_file_1.pdf
