# Supplementary material for: Shank3 modulates sleep and expression of circadian transcription factors
Source: eLife journal article supplement (doi:10.7554/elife.42819), 2019-04-11
Supplement: supp [file elife-42819-supp-v1.zip › elife_poa_e42819_Figure_1_source_data_1.xlsx]

## Sheet: Figure 1 - source data 1
Sleep Phenotype	ASD Incidence	ASD References	TD Incidence	TD References
Difficulty Falling Asleep	48% (25-53%) 2-19 yrs	Andersen, Kaczmarska, McGrew, Malow, 2008; Giannotti et al., 2008; Paavonen et al., 2008; Miano et al., 2007; Cotton and Richdale, 2006; Giannotti et al., 2006; Liu et al., 2006; Polimeni, Richdale, Francis, 2005; Wiggs and Stores, 2004; Williams, Sears, Allard, 2004; Tani et al., 2003; Richdale and Prior, 1995	26% (16-52%) 0.5-18 yrs	Baweja et al., 2013; Hysing et al., 2013; Pallesen et al., 2008; Krakowiak and Hansen, 2008; Johnson et al., 2006; Polimeni, Richdale, Francis, 2005; Cotton and Richdale, 2006; Ohayon et al., 2000; Lozoff et al., 1985
Multiple Night Awakenings	40% (28-57%) 2-19 yrs	Krakowiak and Hansen, 2008; Paavonen et al., 2008; Andersen et al., 2008; Miano et al., 2017; Polimeni, Cotton and Richdale, 2006; Richdale, Francis, 2005; Williams, Sears, Allard, 2004; Richdale and Prior, 1995	16% (16-18%) 0.5-18 yrs	Baweja et al., 2013; Hysing et al., 2013; Ohayon et al., 2000; Sadeh, Raviv and Gruber, 2000
Reduced Sleep Time	48% (36-57%) 2-19 yrs	Paavonen et al., 2008; Miano et al., 2007; Giannotti et al., 2006; Liu et al., 2006	9% (4-19%) 3-19 yrs	Leger et al., 2012; Loessl et al., 2008; Paavonen et al., 2008; Miano et al., 2007
Parasomnias	18% (3-30%) 3-19 yrs	Paavonen et al., 2008; Miano et al., 2007; Liu et al., 2006; Williams, Sears, Allard, 2004	5% (3-6%) 1.5-18 yrs	Ohayon et al., 2000; Patzold et al., 1998; Anders and Eiben, 1997
Sleep Apnea	14% (7-20%) <19 yrs	Miano et al., 2007; Thirumalai, Shubin and Robinson, 2002	2% (1-3%) 0.3-18 yrs	Baweja et al., 2013; Bixler et al., 2009; Lumeng and Chervin, 2008
