# Supplementary material for: Shank3 modulates sleep and expression of circadian transcription factors
Source: eLife journal article supplement (doi:10.7554/elife.42819), 2019-04-11
Supplement: supp [file elife-42819-supp-v1.zip › elife_poa_e42819_Figure_2_figure_supplement_1.pdf]

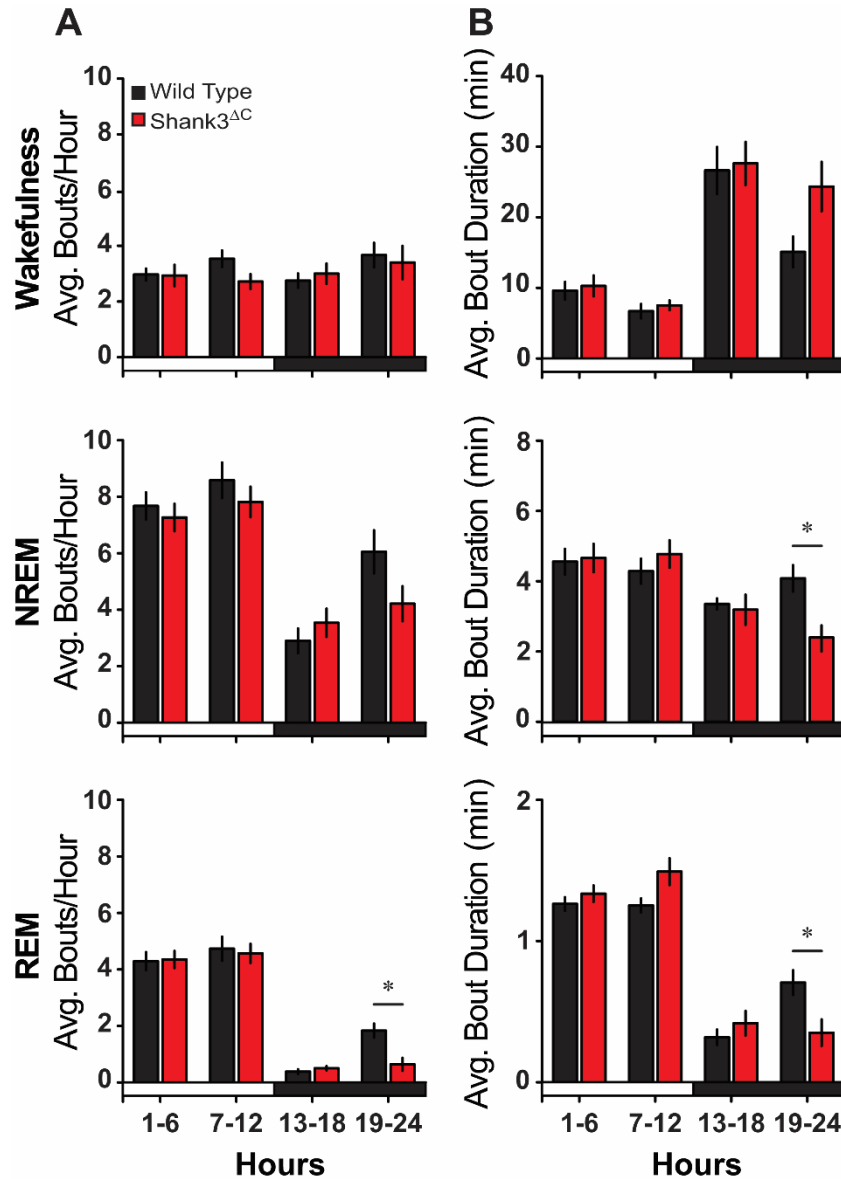

**Figure 2 – figure supplement 1.** Baseline sleep bout analysis. **(A)** Average number of state-specific bouts per hour shown in 6 h blocks. **(B)** Average bout duration (min) per hour shown in 6 h blocks. Repeated measures ANOVA with posthoc pairwise comparisons using Sidak correction. Values are means  $\pm$  SEM for wild type (n = 10) and Shank3<sup>ΔC</sup> (n = 10) mice. \*p < 0.05, difference from wild type.
