# Supplementary material for: Shank3 modulates sleep and expression of circadian transcription factors
Source: eLife journal article supplement (doi:10.7554/elife.42819), 2019-04-11
Supplement: supp [file elife-42819-supp-v1.zip › elife_poa_e42819_Figure_2_source_data_1.xlsx]

## Sheet: Figure 2A
WAKE (%)	WT Baseline												WT 5 h Sleep Deprivation												Shank3 Baseline												Shank3 5 h Sleep Deprivation
Hr / Animal	1	2	3	4	5	6	7	8	9	10	Average	SEM	1	2	3	4	5	6	7	8	9	10	Average	SEM	11	12	13	14	15	16	17	18	19	20	Average	SEM	11	12	13	14	15	16	17	18	19	20	Average	SEM
WAKE	WAKE												WAKE												WAKE												WAKE
1	35.4444	20.6667	26.4444	81.6667	45.2222	69.5556	87.5556	68.1111	59.5556	68.8889	56.3111	7.32077	100	100	100	99.6667	100	100	100	100	100	100	99.9667	0.0333333	18.7778	25.5556	47.7778	58.7778	85	62.4444	20	100	69.5556	56.3333	54.4222	8.60309	87.1111	99.3333	99.7778	100	89.5556	96.7778	98.3333	99.8889	99.2222	97.6667	96.7667	1.45442
2	42.1111	90.4444	27.5556	68.7778	17.8889	18.6667	9.22222	34.8889	30.5556	21.8889	36.2	7.9738	100	99.3333	95.6667	88.1111	97.4444	100	100	100	100	99.7778	98.0333	1.19476	93.5556	47.8889	64.8889	18.3333	63.4444	8.55556	67.8889	46.6667	44.7778	35.5556	49.1556	7.87704	100	88.8889	100	92.5556	97	94.4444	90.2222	98.4444	99.7778	94.6667	95.6	1.29812
3	46.1111	41.3333	76.4444	39.1111	37.4444	27.1111	35.8889	26.7778	32.3333	34.1111	39.6667	4.50289	98.2222	98.6667	93.4444	97.2222	97	100	100	99.6667	95.4444	94	97.3667	0.761208	60.3333	33.8889	50.2222	9.77778	49	32.7778	55.1111	35.4444	9.33333	41.7778	37.7667	5.52233	100	93.6667	100	85.2222	93.2222	91.7778	91.6667	98.6667	99.7778	92.5556	94.6556	1.53875
4	36.3333	47.8889	29.5556	41.8889	21.4444	26	30.3333	23.6667	20.5556	36.5556	31.4222	2.87331	98.5556	99	89.2222	95.6667	90.5556	100	99.8889	99.3333	99.2222	98.8889	97.0333	1.25392	62.2222	13.3333	46.7778	35.3333	53.2222	9.77778	20.8889	50.5556	39.6667	22.6667	35.4444	5.70628	100	98.5556	97.6667	90.2222	85.8889	91	94.8889	98.3333	99.7778	93.6667	95	1.49934
5	26.4444	23.6667	25.3333	27.2222	27.5556	34	11.4444	31.6667	19.4444	23.6667	25.0444	1.99239	93.8889	94.1111	87	94.7778	85.7778	99.1111	97.6667	98.8889	98.7778	94.5556	94.4556	1.49727	77.6667	45.7778	40.6667	7.66667	14.2222	49.4444	8.22222	48.2222	44.3333	19.5556	35.5778	7.12614	100	91.7778	97.5556	81.2222	89.2222	85.4444	97.3333	97.3333	97.5556	96.2222	93.3667	1.96827
6	41.6667	25.5556	37.4444	36.1111	32.4444		33.5556	33.1111	39.3333	88.2222	40.8272	6.12238	38.8889	14	24	25	37.4444	30.1111	55	49.3333	21.5556	26.2222	32.1556	4.06795	12.1111	13.7778	45.6667	29.4444	5.33333	6.11111	38.4444	6.66667	6.33333	7.88889	17.1778	4.74777	70.2222	67.4444	39.2222	56.6667	13.4444	35	6.66667	63.4444	74.7778	19.4444	44.6333	7.99532
7	26.3333	37.4444	18.5556	16.1111	50.8889	21.4444	8.55556	32.7778	21	17.3333	25.0444	3.89549	13.8889	22.7778	15.8889	54	13.2222	21.5556	28.7778	20	27.2222	35.1111	25.2444	3.87131	12.5556	33.1111	29.8889	21	51	18.5556	7.55556	53.1111	4.11111	12.8889	24.3778	5.4281	45	48.6667	50.4444	31.2222	46.2222	12.1111	68	42.2222	45.5556	11	40.0444	5.5413
8	55.1111	24.8889	48.5556	36.8889	8.44444	26.1111	56.2222	32.6667	29.3333	54.3333	37.2556	5.04322	49.1111	32.4444	35.2222	11.4444	26.1111	14.4444	14.3333	28.1111	9.55556	32.1111	25.2889	4.01302	16.2222	30.5556	53.2222	37.1111	25.8889	65.3333	47.4444	7.66667	71.7778	43.5556	39.8778	6.49943	36.7778	9	12.3333	6.66667	4.77778	13.1111	6.77778	34.8889	34.3333	61.5556	22.0222	5.96857
9	36.2222	39.5556	23.2222	27.7778	24.6667	35.7778	7.33333	28.5556	36.3333	24.8889	28.4333	2.98195	28.6667	35.3333	34.8889	37.3333	24.3333	25.7778	14.4444	40.4444	28.4444	29.8889	29.9556	2.38354	66.7778	41.6667	32.2222	13.7778	8	5.44444	11	14.5556	12.8889	14.5556	22.0889	6.0999	30.8889	53.8889	39.5556	13.2222	32.6667	45.3333	35.3333	8.33333	17	9.33333	28.5556	5.01069
10	27.5556	28.4444	45.7778	43	31.1111	15.5556	43.2222	50.1111	43.4444	28.7778	35.7	3.4526	43.7778	27.7778	25.6667	33.8889	20.6667	31.3333	40.3333	22.5556	58.1111	44.1111	34.8222	3.70671	11.3333	37.6667	48.4444	10.5556	54	32.7778	21.1111	51.8889	6.88889	33.2222	30.7889	5.58335	79.3333	15.5556	11.3333	62.5556	21.1111	5.22222	22.3333	70	30.7778	11.7778	33	8.5927
11	36.3333	45.5556	47.7778	28.3333	15.4444	36.7778	49	39.1111	30.7778	61.6667	39.0778	4.05798	42.3333	27	32.6667	22.7778	38.1111	48.8889	31.5556	37	16.4444	39.4444	33.6222	3.048	57.2222	33.4444	27.5556	28.6667	20.2222	21.3333	52.1111	18.4444	41.6667	21.5556	32.2222	4.36126	7	23.8889	46	9.11111	18	49	32	18.4444	25.5556	34.5556	26.3556	4.48319
12	47.6667	50.6667	50.7778	43.1111	58.5556	43.4444	41.1111	56.5556	60	58.5556	51.0444	2.24697	35.6667	31.5556	51	26.5556	41.6667	34.3333	47.8889	48.3333	44.6667	52.1111	41.3778	2.80452	60.8889	60	52.2222	48	49.2222	48.8889	56.8889	49.2222	58.6667	45.7778	52.9778	1.7691	32.4444	24.6667	33.4444	36.7778	33.3333	27.3333	39.8889	35.7778	33.5556	27.5556	32.4778	1.48639
13	95.6667	100	98.1111	100	88.3333	99.7778	99.8889	82.3333	91.1111	100	95.5222	1.96959	99.7778	99.1111	84.4444	80.7778	85.4444	89.8889	78	83	89.3333	88.2222	87.8	2.26936	100	77.3333	88.3333		95.1111	89.8889	97.4444	100	99.5556	100	94.1852	2.5778	100	99.8889	78.2222		82	73	88.8889	78.7778	79.8889	63.2222	82.6543	3.9971
14	68.2222	69.1111	79.7778	76.8889	61.1111	63	100	87.6667	76.2222	84.2222	76.6222	3.78533	83.3333	48	64.3333	82.4444	63.4444	52	84.8889	64.4444	55.1111	64.5556	66.2556	4.18912	100	99.8889	65.8889		69.7778	76.5556	70.5556	71	82.6667	51	76.3704	5.28466	80.3333	55.3333	67.5556		83.1111	76.5556	50.5556	48.4444	54.6667	51.6667	63.1358	4.61374
15	99.5556	56.7778	73.6667	93.2222	71.5556	75.8889	100	68.2222	73	86.3333	79.8222	4.5367	72.8889	58.5556	65.3333	75.4444	75.3333	56.7778	59	42.4444	62.5556	40.4444	60.8778	3.90316	91.6667	55	82.6667		79	65.6667	58.8889	91.1111	79.6667	56.4444	73.3457	4.8595	69.7778	77.3333	62		54.2222	44.7778	54.1111	48	63.7778	73.4444	60.8272	3.78721
16	86.5556	68	93.1111	42.7778	85.7778	86.8889	87.8889	62.1111	69.4444	80.8889	76.3444	4.92842	38.4444	36.7778	45.2222	54.2222	60.8889	42	68.4444	62.5556	49.2222	61.7778	51.9556	3.54416	88.1111	55.8889	73.3333		63.1111	43.5556	65.6667	58.1111	68.6667	65.7778	64.6914	4.10133	54	20.5556	59.8889		71.3333	73.3333	81.7778	51.8889	42	48.3333	55.9012	6.17688
17	100	39	72.6667	95.2222	93.2222	83.1111	100	80.8889	70.5556	57.2222	79.1889	6.28334	87.8889	47.7778	100	85	55.1111	40.2222	87.2222	57.7778	75.3333	79.1111	71.5444	6.30769	95.7778	83.7778	86.2222		100	92.4444	64	85.1111	87.6667	100	88.3333	3.67554	79.6667	90	79.7778		71.5556	58	75.6667	96.7778	97.8889	73.1111	80.2716	4.28587
18	56.5556	87.3333	93.3333	100	82.4444	73.6667	80.5556	65.8889	68.7778	79.4444	78.8	4.13463	37.2222	76.1111	60.1111	76.5556	63.6667	61.1111	25	52.1111	64.1111	38.4444	55.4444	5.40413	100	57.3333	85.5556		68.6667	66.8889	95.8889	100	96.5556	61.8889	81.4198	5.8706	84	60.3333	75.2222		74.6667	57.4444	83.8889	100	73.3333	73.2222	75.7901	4.26354
19	64.6667	38	54.4444	72.1111	29.5556	34.4444	89.6667	43.8889	56.4444	49.3333	53.2556	5.84475	52.5556	99.1111	75.6667	85.5556	60.6667	33.4444	92.1111	54.8889	20.3333	83.2222	65.7556	8.18398	86.2222	99.7778	68.4444		95.4444	94.3333	100	100	99.7778	100	93.7778	3.51603	61.1111	88.2222	68.5556		82.8889	99.4444	100	100	100	89.4444	87.7407	4.84729
20	67.3333	83.1111	59.2222	92.4444	57.8889	28.6667	59.7778	58.8889	56.5556	70.4444	63.4333	5.40755	75.3333	37.2222	34.5556	65.7778	30.2222	37.7778	44.1111	37.6667	62.3333	38.2222	46.3222	4.91643	93.7778	42.5556	78.8889		100	78.3333	100	47.1111	100	58.1111	77.642	7.73402	78.3333	50.7778	74.5556		100	67.7778	65.2222	84.2222	78.4444	60.8889	73.358	4.77633
21	33	36.7778	36.2222	60.1111	59.1111	44.1111	71.1111	56	84.7778	65.6667	54.6889	5.36485	58	35.8889	42.2222	91.7778	40.3333	24.8889	55.2222	42.7778	21.3333	72.8889	48.5333	6.82854	100	49.5556	66.4444		78.6667	79.2222	55.8889	77.2222	55.3333	74	70.7037	5.22908	97.1111	35.1111	54.7778		70.8889	78	66	55	86	58	66.7654	6.23118
22	46.4444	47.4444	61.7778	70.1111	40.6667	25.4444	45.1111	64.7778	37	48.6667	48.7444	4.28139	48.8889	35.7778	63.4444	45.8889	38.1111	27.1111	13.8889	66.1111	68.2222	46.3333	45.3778	5.53959	100	32.7778	74.4444		73.1111	73.7778	100	39.4444	82.5556	59	70.5679	7.85156	84.7778	22.7778	48.7778		86.2222	65.2222	61.4444	66.2222	57.6667	74.6667	63.0864	6.47202
23	75.3333	62.6667	74	68.7778	87.7778	67	85.6667	30.2222	72.8889	69.2222	69.3556	5.00808	62	61.7778	85.1111	83	65.4444	100	78.5556	38.7778	50.5556	74.7778	70	5.67513	72.3333	66.6667	86.3333			73.6667	78.1111	69.7778	92.7778	69.5556	76.1528	3.21489	99.5556	28.5556	86.5556			56	80.3333	100	93.3333	58.2222	75.3194	8.98891
24	78.6667	73.1111	100	76.7778	79.2222	100	75.1111	41	72.2222	100	79.6111	5.64122	77.7778	100	100	90.4444	88.3333	47.1111	78.5556	89.4444	100	63.4444	83.5111	5.48456	95	38.7778	88			95.3333	72.3333	100	74.7778	57.2222	77.6806	7.54181	85.2222	80	86.3333			83.5556	73.5556	100	100	72.7778	85.1806	3.68154
NREMS	NREMS												NREMS												NREMS												NREMS
Hr
1	51.3333	66.5556	65.3333	15.5556	49	28	12.4444	30.3333	37.1111	30.1111	38.5778	5.99686	0	0	0	0.333333	0	0	0	0	0	0	0.0333333	0.0333333	62.1111	65.4444	44.4444	36.5556	13.5556	35.3333	69.4444	0	27.6667	38.2222	39.2778	7.07582	12.4444	0.666667	0.222222	0	1.11111	3.22222	1.66667	0.111111	0.777778	2.33333	2.25556	1.17823
2	48.2222	7.22222	62.4444	25.1111	69.2222	70.7778	74.6667	53.7778	59.8889	67.2222	53.8556	6.89371	0	0.666667	4.33333	11.8889	2.55556	0	0	0	0	0.222222	1.96667	1.19476	6.22222	38.3333	32.1111	67.7778	32.6667	78.8889	30.4444	47.7778	46	56.7778	43.7	6.56258	0	11.1111	0	7.44444	3	5.55556	9.77778	1.55556	0.222222	5.33333	4.4	1.29812
3	46.5556	52.3333	21.1111	53.8889	58.1111	63.3333	59.6667	65.5556	57.4444	57	53.5	3.98317	1.77778	1.33333	6.55556	2.77778	3	0	0	0.333333	4.55556	6	2.63333	0.761208	34.3333	55.7778	41.1111	75.6667	41.2222	61.6667	37.1111	58	75.6667	49.1111	52.9667	4.75097	0	6.33333	0	14.7778	6.77778	8.22222	8.33333	1.33333	0.222222	7.44444	5.34444	1.53875
4	53.8889	46.4444	63.2222	45.4444	63.8889	66.2222	55.4444	65.2222	68.5556	56.6667	58.5	2.59705	1.44444	1	10.7778	4.33333	9.44444	0	0.111111	0.666667	0.777778	1.11111	2.96667	1.25392	31.2222	71	41.7778	55.2222	37.3333	77.5556	69.2222	43.1111	54.2222	68.4444	54.9111	5.10122	0	1.44444	2.33333	9.77778	14.1111	9	5.11111	1.66667	0.222222	6.33333	5	1.49934
5	58.7778	65.6667	56	58.6667	64.8889	59.2222	74.3333	57.8889	73.2222	69.2222	63.7889	2.11374	6.11111	5.88889	13	5.22222	14.2222	0.888889	2.33333	1.11111	1.22222	5.44444	5.54444	1.49727	17.6667	46	49.6667	77.3333	72.5556	46.1111	79	46.7778	46.7778	68.2222	55.0111	6.03255	0	8.22222	2.44444	18.7778	10.7778	14.5556	2.66667	2.66667	2.44444	3.77778	6.63333	1.96827
6	50.1111	62.3333	57.5556	54.8889	60.5556		56.8889	57.2222	56.1111	11.7778	51.9383	5.14865	50.4444	70.5556	62.8889	65.4444	55.7778	65.7778	42.1111	43.6667	70.2222	69.4444	59.6333	3.44974	72.5556	69.7778	44.2222	59.2222	68.7778	80.2222	51.3333	78.3333	83.2222	79.2222	68.6889	4.15505	27.1111	29.1111	46	38.2222	70.3333	50.5556	80.7778	33.6667	23.1111	71.2222	47.0111	6.52076
7	61.2222	53.3333	69.5556	67.8889	44.8889	64.5556	81.4444	59.7778	66.8889	71.7778	64.1333	3.20386	70.8889	59.5556	70.8889	36.3333	77.7778	69.1111	66.2222	67.6667	63	54.8889	63.6333	3.64709	74	53.7778	54.4444	68.6667	42.5556	69.8889	78.8889	38.1111	79.1111	71.6667	63.1111	4.69427	45.6667	47.6667	43	57.1111	45.8889	76.8889	29.3333	51.5556	50.1111	71.4444	51.8667	4.36942
8	36.4444	66.1111	41.6667	54.3333	78.7778	60.6667	33.7778	59.2222	60	38.2222	52.9222	4.68451	45.1111	56.8889	52.8889	79.4444	62.8889	75	71.7778	62.7778	76.3333	58.2222	64.1333	3.55728	70.1111	58.3333	37	51.6667	59.5556	29.7778	44.5556	78.6667	26.3333	48.7778	50.4778	5.32986	54.4444	76.6667	74.2222	82.4444	82.7778	74.4444	82.3333	53.6667	56.1111	33.3333	67.0444	5.28206
9	48.8889	50.8889	61.6667	62.4444	64.2222	55.7778	85.4444	59.8889	59.2222	69.5556	61.8	3.26228	56.7778	49	55.5556	47.5556	64.6667	64.1111	75.2222	53.6667	59.4444	58.8889	58.4889	2.57167	30.7778	49.5556	55.2222	69	71.3333	83.6667	74.6667	73.7778	77.5556	74.8889	66.0444	5.08251	62.1111	38.5556	52	77.6667	55.2222	46	56.3333	76.6667	72.8889	78.5556	61.6	4.51579
10	56.4444	63.7778	48.1111	49.3333	60.5556	69.7778	50.5556	45.6667	48.2222	65.3333	55.7778	2.71105	51.4444	65.6667	67.5556	62.4444	69.3333	59.3333	50.2222	68.3333	36.5556	51.4444	58.2333	3.35427	70.1111	52.4444	38.1111	75.7778	38.5556	60.4444	70.2222	43.1111	79.8889	54.3333	58.3	4.87163	18.5556	74.6667	76.2222	30.6667	69	83.8889	67.2222	26.8889	61.7778	78.2222	58.7111	7.58298
11	50.8889	46.6667	44.1111	59.4444	71.2222	56.1111	44	51	62.8889	34.3333	52.0667	3.38192	49	58.3333	60.2222	62.8889	55.1111	48.4444	59.8889	53.3333	69.5556	53.3333	57.0111	2.0561	37.1111	57.3333	61.8889	61	73.4444	68	42.7778	67.2222	51.8889	69.4444	59.0111	3.76284	80.1111	58.1111	46.1111	71.2222	73.7778	44.6667	58.3333	68	65	58.6667	62.4	3.63281
12	44.7778	39.1111	39.8889	52.5556	38.3333	47.2222	55.2222	39.7778	38.2222	37.8889	43.3	2.0185	56	59.7778	45.4444	62.4444	50.5556	55.7778	45	45.8889	50.1111	42.2222	51.3222	2.17521	31.3333	35.7778	38.3333	45.5556	42.4444	44.6667	41.1111	42.3333	35.4444	48.8889	40.5889	1.69086	60.6667	66.6667	56.5556	53.3333	59.1111	67.1111	55	55	57.6667	63.8889	59.5	1.56569
13	4.33333	0	1.88889	0	11.6667	0.222222	0.111111	17.6667	8.88889	0	4.47778	1.96959	0.222222	0.888889	15.5556	18.5556	14.5556	7.66667	20.1111	16.2222	9.11111	11.7778	11.4667	2.19157	0	22.6667	11.6667		4.88889	10.1111	2.55556	0	0.444444	0	5.81481	2.5778	0	0.111111	20.6667		18	27	9.55556	21.2222	17.1111	32	16.1852	3.69114
14	31.7778	30.8889	20.2222	21	37.5556	36.7778	0	12.1111	23.7778	15.7778	22.9889	3.73128	16.6667	50.5556	28.8889	15.1111	34.4444	44.5556	15.1111	34.1111	43.5556	34.5556	31.7556	4.03747	0	0.111111	31.8889		30.2222	23.4444	28.6667	26	16.4444	48.5556	22.8148	5.1655	16.7778	43.6667	28.6667		14	21.5556	44.7778	45.8889	34.8889	45.3333	32.8395	4.32688
15	0.444444	43.2222	24.6667	6.77778	28.4444	22.6667	0	30.2222	26.3333	13.6667	19.6444	4.44743	26.7778	39.7778	33.6667	23.7778	24.6667	39.8889	34.6667	54.6667	34.5556	54.4444	36.6889	3.47287	6.11111	43.2222	16		18.6667	34.3333	37.8889	7	20.3333	41.5556	25.0123	4.83484	25.4444	21.1111	35.5556		39.8889	50.3333	41	45.8889	31.8889	24.2222	35.037	3.38281
16	13.4444	27.3333	6.22222	46.3333	14.2222	13.1111	12.1111	36.2222	28.3333	17.4444	21.4778	4.00055	53.7778	57.6667	51.5556	39.1111	35.6667	51.3333	28.4444	31.7778	44.8889	33.3333	42.7556	3.29483	11.8889	41.3333	26.6667		35.6667	51.6667	32.2222	37.1111	29.6667	34.2222	33.3827	3.61245	40.8889	70.8889	38.4444		28.6667	23.2222	17	42.7778	48.6667	49.4444	40	5.3597
17	0	61	27.3333	4.77778	6.77778	15.7778	0	18.7778	27.7778	41	20.3222	6.20134	12.1111	50	0	14.3333	40.4444	52.2222	10.1111	40.8889	23.8889	20.8889	26.4889	5.75382	4.22222	16.2222	13.7778		0	7.55556	33.5556	13	12.3333	0	11.1852	3.43392	19.7778	10	17.1111		27.4444	37.8889	20.5556	1.55556	2.11111	26.8889	18.1481	4.01549
18	41.8889	12.6667	6.66667	0	16.2222	26.3333	19.1111	32.1111	30.1111	20.5556	20.5667	3.96073	57.5556	21.1111	38.2222	20	32.3333	36.1111	65.6667	39.3333	32.3333	57.6667	40.0333	4.91274	0	41.6667	14.4444		31	33.1111	4.11111	0	3.44444	38.1111	18.4321	5.80426	16	37.4444	24.7778		24.3333	41.2222	16.1111	0	26	25.2222	23.4568	4.05371
19	34.7778	61.2222	42.8889	25.6667	62.5556	61.3333	10.3333	54.4444	42.4444	48.7778	44.4444	5.4053	41.8889	0.888889	21.3333	11.8889	39.3333	58.4444	7.88889	39.4444	69.3333	15.1111	30.5556	7.17397	12.3333	0.222222	31.5556		4.55556	5.66667	0	0	0.222222	0	6.06173	3.47636	35.3333	11.7778	29.5556		16.1111	0.555556	0	0	0	10.5556	11.5432	4.4609
20	32.1111	16.4444	38.7778	7.55556	39.3333	62.1111	35.3333	38	42.2222	27.5556	33.9444	4.68978	22.7778	60.8889	60.3333	33.2222	56.6667	55.6667	48.3333	53.1111	36.2222	56.5556	48.3778	4.14111	6.22222	57.1111	17.6667		0	21.6667	0	51.5556	0	40.1111	21.5926	7.59447	20.4444	43.6667	23.5556		0	27.3333	29.2222	13.4444	20.8889	38.5556	24.1235	4.32503
21	65	61.7778	56.4444	36.2222	40.7778	49.5556	28.2222	41.4444	13.7778	31.8889	42.5111	5.06296	39.2222	57.5556	50.7778	8.22222	53.1111	62.7778	38.3333	51.2222	69.8889	24.4444	45.5556	5.85084	0	46.5556	33.5556		21.3333	20.7778	40	21.2222	44.6667	26	28.2346	4.89756	2.88889	53.4444	43.7778		28.2222	20.4444	29.1111	42.4444	14	42	30.7037	5.42646
22	53.1111	51.1111	36	29.8889	54.4444	64.7778	46.5556	32	57.5556	48.1111	47.3556	3.61493	49.5556	56	34.5556	51.2222	54.3333	65.4444	74.1111	33.1111	30.2222	47.3333	49.5889	4.46803	0	63.3333	23.1111		26.3333	25.7778	0	51	17.4444	41	27.5556	7.12556	15.2222	69	41		13.2222	33.2222	37.1111	32	40.3333	23.2222	33.8148	5.56348
23	24.6667	35.7778	25.1111	26.8889	12.2222	26.7778	11.8889	62.1111	25.7778	29.4444	28.0667	4.42434	37	35	13.5556	13.4444	33	0	13.5556	53.4444	46.5556	24.1111	26.9667	5.33783	24.2222	29.6667	13.6667			25.2222	19.3333	29.3333	7.22222	30.4444	22.3889	2.96682	0.444444	63.8889	13.4444			37.5556	18.4444	0	6.66667	40.1111	22.5694	8.00855
24	20.3333	25.5556	0	19.8889	18.4444	0	24	55.5556	26.6667	0	19.0444	5.32178	22.2222	0	0	8.88889	11.6667	52.3333	20.7778	10.5556	0	33.7778	16.0222	5.33821	5	59.3333	12			4.66667	23.8889	0	24.8889	42.7778	21.5694	7.33067	14.4444	15.7778	12.7778			15.5556	24.2222	0	0	26.5556	13.6667	3.43438
REMS	REMS												REMS												REMS												REMS
Hr
1	13.2222	12.7778	8.22222	2.77778	5.77778	2.44444	0	1.55556	3.33333	1	5.11111	1.51318	0	0	0	0	0	0	0	0	0	0	0	0	19.1111	9	7.77778	4.66667	1.44444	2.22222	10.5556	0	2.77778	5.44444	6.3	1.78702	0.444444	0	0	0	0	0	0	0	0	0	0.0444444	0.0444444
2	9.66667	2.33333	10	6.11111	12.8889	10.5556	16.1111	11.3333	9.55556	10.8889	9.94444	1.16784	0	0	0	0	0	0	0	0	0	0	0	0	0.222222	13.7778	3	13.8889	3.88889	12.5556	1.66667	5.55556	9.22222	7.66667	7.14444	1.6041	0	0	0	0	0	0	0	0	0	0	0	0
3	7.33333	6.33333	2.44444	7	4.44444	9.55556	4.44444	7.66667	10.2222	8.88889	6.83333	0.781868	0	0	0	0	0	0	0	0	0	0	0	0	5.33333	10.3333	8.66667	14.5556	9.77778	5.55556	7.77778	6.55556	15	9.11111	9.26667	1.06164	0	0	0	0	0	0	0	0	0	0	0	0
4	9.77778	5.66667	7.22222	12.6667	14.6667	7.77778	14.2222	11.1111	10.8889	6.77778	10.0778	1.00302	0	0	0	0	0	0	0	0	0	0	0	0	6.55556	15.6667	11.4444	9.44444	9.44444	12.6667	9.88889	6.33333	6.11111	8.88889	9.64444	0.956503	0	0	0	0	0	0	0	0	0	0	0	0
5	14.7778	10.6667	18.6667	14.1111	7.55556	6.77778	14.2222	10.4444	7.33333	7.11111	11.1667	1.29749	0	0	0	0	0	0	0	0	0	0	0	0	4.66667	8.22222	9.66667	15	13.2222	4.44444	12.7778	5	8.88889	12.2222	9.41111	1.21739	0	0	0	0	0	0	0	0	0	0	0	0
6	8.22222	12.1111	5	9	7		9.55556	9.66667	4.55556	0	7.23457	1.20034	10.6667	15.4444	13.1111	9.55556	6.77778	4.11111	2.88889	7	8.22222	4.33333	8.21111	1.28177	15.3333	16.4444	10.1111	11.3333	25.8889	13.6667	10.2222	15	10.4444	12.8889	14.1333	1.49226	2.66667	3.44444	14.7778	5.11111	16.2222	14.4444	12.5556	2.88889	2.11111	9.33333	8.35556	1.8095
7	12.4444	9.22222	11.8889	16	4.22222	14	10	7.44444	12.1111	10.8889	10.8222	1.05698	15.2222	17.6667	13.2222	9.66667	9	9.33333	5	12.3333	9.77778	10	11.1222	1.13474	13.4444	13.1111	15.6667	10.3333	6.44444	11.5556	13.5556	8.77778	16.7778	15.4444	12.5111	1.03003	9.33333	3.66667	6.55556	11.6667	7.88889	11	2.66667	6.22222	4.33333	17.5556	8.08889	1.41962
8	8.44444	9	9.77778	8.77778	12.7778	13.2222	10	8.11111	10.6667	7.44444	9.82222	0.608175	5.77778	10.6667	11.8889	9.11111	11	10.5556	13.8889	9.11111	14.1111	9.66667	10.5778	0.771189	13.6667	11.1111	9.77778	11.2222	14.5556	4.88889	8	13.6667	1.88889	7.66667	9.64444	1.2932	8.77778	14.3333	13.4444	10.8889	12.4444	12.4444	10.8889	11.4444	9.55556	5.11111	10.9333	0.837594
9	14.8889	9.55556	15.1111	9.77778	11.1111	8.44444	7.22222	11.5556	4.44444	5.55556	9.76667	1.12613	14.5556	15.6667	9.55556	15.1111	11	10.1111	10.3333	5.88889	12.1111	11.2222	11.5556	0.936678	2.44444	8.77778	12.5556	17.2222	20.6667	10.8889	14.3333	11.6667	9.55556	10.5556	11.8667	1.56012	7	7.55556	8.44444	9.11111	12.1111	8.66667	8.33333	15	10.1111	12.1111	9.84444	0.791796
10	16	7.77778	6.11111	7.66667	8.33333	14.6667	6.22222	4.22222	8.33333	5.88889	8.52222	1.20903	4.77778	6.55556	6.77778	3.66667	10	9.33333	9.44444	9.11111	5.33333	4.44444	6.94444	0.748707	18.5556	9.88889	13.4444	13.6667	7.44444	6.77778	8.66667	5	13.2222	12.4444	10.9111	1.29214	2.11111	9.77778	12.4444	6.77778	9.88889	10.8889	10.4444	3.11111	7.44444	10	8.28889	1.07678
11	12.7778	7.77778	8.11111	12.2222	13.3333	7.11111	7	9.88889	6.33333	4	8.85556	0.977392	8.66667	14.6667	7.11111	14.3333	6.77778	2.66667	8.55556	9.66667	14	7.22222	9.36667	1.23262	5.66667	9.22222	10.5556	10.3333	6.33333	10.6667	5.11111	14.3333	6.44444	9	8.76667	0.91166	12.8889	18	7.88889	19.6667	8.22222	6.33333	9.66667	13.5556	9.44444	6.77778	11.2444	1.47124
12	7.55556	10.2222	9.33333	4.33333	3.11111	9.33333	3.66667	3.66667	1.77778	3.55556	5.65556	0.983743	8.33333	8.66667	3.55556	11	7.77778	9.88889	7.11111	5.77778	5.22222	5.66667	7.3	0.721994	7.77778	4.22222	9.44444	6.44444	8.33333	6.44444	2	8.44444	5.88889	5.33333	6.43333	0.703791	6.88889	8.66667	10	9.88889	7.55556	5.55556	5.11111	9.22222	8.77778	8.55556	8.02222	0.539217
13	0	0	0	0	0	0	0	0	0	0	0	0	0	0	0	0.666667	0	2.44444	1.88889	0.777778	1.55556	0	0.733333	0.291253	0	0	0		0	0	0	0	0	0	0	0	0	0	1.11111		0	0	1.55556	0	3	4.77778	1.16049	0.56961
14	0	0	0	2.11111	1.33333	0.222222	0	0.222222	0	0	0.388889	0.231444	0	1.44444	6.77778	2.44444	2.11111	3.44444	0	1.44444	1.33333	0.888889	1.98889	0.627327	0	0	2.22222		0	0	0.777778	3	0.888889	0.444444	0.814815	0.364302	2.88889	1	3.77778		2.88889	1.88889	4.66667	5.66667	10.4444	3	4.02469	0.925885
15	0	0	1.66667	0	0	1.44444	0	1.55556	0.666667	0	0.533333	0.232951	0.333333	1.66667	1	0.777778	0	3.33333	6.33333	2.88889	2.88889	5.11111	2.43333	0.660974	2.22222	1.77778	1.33333		2.33333	0	3.22222	1.88889	0	2	1.64198	0.353688	4.77778	1.55556	2.44444		5.88889	4.88889	4.88889	6.11111	4.33333	2.33333	4.1358	0.544261
16	0	4.66667	0.666667	10.8889	0	0	0	1.66667	2.22222	1.66667	2.17778	1.07423	7.77778	5.55556	3.22222	6.66667	3.44444	6.66667	3.11111	5.66667	5.88889	4.88889	5.28889	0.507069	0	2.77778	0		1.22222	4.77778	2.11111	4.77778	1.66667	0	1.92593	0.631533	5.11111	8.55556	1.66667		0	3.44444	1.22222	5.33333	9.33333	2.22222	4.09877	1.08495
17	0	0	0	0	0	1.11111	0	0.333333	1.66667	1.77778	0.488889	0.233186	0	2.22222	0	0.666667	4.44444	7.55556	2.66667	1.33333	0.777778	0	1.96667	0.767668	0	0	0		0	0	2.44444	1.88889	0	0	0.481481	0.321818	0.555556	0	3.11111		1	4.11111	3.77778	1.66667	0	0	1.58025	0.558565
18	1.55556	0	0	0	1.33333	0	0.333333	2	1.11111	0	0.633333	0.247927	5.22222	2.77778	1.66667	3.44444	4	2.77778	9.33333	8.55556	3.55556	3.88889	4.52222	0.795228	0	1	0		0.333333	0	0	0	0	0	0.148148	0.112644	0	2.22222	0		1	1.33333	0	0	0.666667	1.55556	0.753086	0.275782
19	0.555556	0.777778	2.66667	2.22222	7.88889	4.22222	0	1.66667	1.11111	1.88889	2.3	0.728049	5.55556	0	3	2.55556	0	8.11111	0	5.66667	10.3333	1.66667	3.68889	1.14393	1.44444	0	0		0	0	0	0	0	0	0.160494	0.160494	3.55556	0	1.88889		1	0	0	0	0	0	0.716049	0.418253
20	0.555556	0.444444	2	0	2.77778	9.22222	4.88889	3.11111	1.22222	2	2.62222	0.866572	1.88889	1.88889	5.11111	1	13.1111	6.55556	7.55556	9.22222	1.44444	5.22222	5.3	1.24601	0	0.333333	3.44444		0	0	0	1.33333	0	1.77778	0.765432	0.402088	1.22222	5.55556	1.88889		0	4.88889	5.55556	2.33333	0.666667	0.555556	2.51852	0.743513
21	2	1.44444	7.33333	3.66667	0.111111	6.33333	0.666667	2.55556	1.44444	2.44444	2.8	0.745871	2.77778	6.55556	7	0	6.55556	12.3333	6.44444	6	8.77778	2.66667	5.91111	1.09065	0	3.88889	0		0	0	4.11111	1.55556	0	0	1.06173	0.580936	0	11.4444	1.44444		0.888889	1.55556	4.88889	2.55556	0	0	2.53086	1.23072
22	0.444444	1.44444	2.22222	0	4.88889	9.77778	8.33333	3.22222	5.44444	3.22222	3.9	1.02459	1.55556	8.22222	2	2.88889	7.55556	7.44444	12	0.777778	1.55556	6.33333	5.03333	1.19568	0	3.88889	2.44444		0.555556	0.444444	0	9.55556	0	0	1.87654	1.06211	0	8.22222	10.2222		0.555556	1.55556	1.44444	1.77778	2	2.11111	3.09877	1.19088
23	0	1.55556	0.888889	4.33333	0	6.22222	2.44444	7.66667	1.33333	1.33333	2.57778	0.833753	1	3.22222	1.33333	3.55556	1.55556	0	7.88889	7.77778	2.88889	1.11111	3.03333	0.872543	3.44444	3.66667	0			1.11111	2.55556	0.888889	0	0	1.45833	0.548542	0	7.55556	0			6.44444	1.22222	0	0	1.66667	2.11111	1.09573
24	1	1.33333	0	3.33333	2.33333	0	0.888889	3.44444	1.11111	0	1.34444	0.410243	0	0	0	0.666667	0	0.555556	0.666667	0	0	2.77778	0.466667	0.273573	0	1.88889	0			0	3.77778	0	0.333333	0	0.75	0.490091	0.333333	4.22222	0.888889			0.888889	2.22222	0	0	0.666667	1.15278	0.504799

## Sheet: Figure 2B
WAKE	WT Baseline																											Shank3 Baseline
Animal / Hz	0	0.78125	1.5625	2.34375	3.125	3.90625	4.6875	5.46875	6.25	7.03125	7.8125	8.59375	9.375	10.1562	10.9375	11.7188	12.5	13.2812	14.0625	14.8438	15.625	16.4062	17.1875	17.9688	18.75	19.5312	Animal / Hz	0	0.78125	1.5625	2.34375	3.125	3.90625	4.6875	5.46875	6.25	7.03125	7.8125	8.59375	9.375	10.1562	10.9375	11.7188	12.5	13.2812	14.0625	14.8438	15.625	16.4062
1	1.85387	9.08784	9.3485	8.1052	7.80924	8.16066	7.51984	6.35267	6.02445	5.3554	4.48418	3.64522	2.91315	2.35603	2.04798	1.809	1.62901	1.49338	1.33759	1.27255	1.17423	1.09911	1.02197	0.990713	0.960463	0.912061	11	1.70947	8.42301	9.10577	7.41115	6.44451	5.9649	5.30314	5.09773	5.08255	4.92074	4.4673	3.89274	3.36791	2.91253	2.66126	2.44648	2.18876	1.99401	1.89615	1.91036	1.96946	2.08637
2	1.82071	8.82568	8.36989	6.88392	6.77707	6.96184	6.8403	6.88686	7.16327	6.49723	5.36657	4.2168	3.23465	2.68476	2.31571	1.98833	1.72662	1.559	1.44481	1.37178	1.31101	1.25955	1.19976	1.15222	1.12772	1.05322	12	2.15579	10.4095	9.79339	7.5723	6.627	6.6679	6.76751	6.31564	5.75294	5.02995	4.30432	3.5965	2.99158	2.61228	2.29564	2.09312	1.89918	1.78571	1.66038	1.58122	1.53042	1.44401
3	1.76435	8.36011	9.938	9.47962	9.28238	9.39391	8.10398	6.19502	5.41184	4.84695	4.02968	3.24024	2.63023	2.24428	1.98088	1.75407	1.57513	1.49067	1.37664	1.2571	1.12352	1.00372	0.912249	0.844833	0.792453	0.737568	13	1.99465	9.59656	9.85373	8.42061	8.13544	8.09448	7.31752	6.85009	6.2069	5.28294	4.15159	3.29166	2.69177	2.23445	1.97521	1.7704	1.59982	1.45386	1.37064	1.28353	1.22313	1.1788
4	2.04472	9.65279	9.23988	7.46367	7.57134	8.3313	8.47696	6.91524	5.78374	4.85616	4.0012	3.46121	2.94781	2.49817	2.14183	1.89906	1.74834	1.60901	1.50515	1.42197	1.31389	1.20707	1.11081	1.03904	0.984996	0.900555	14	1.98694	9.83799	10.2585	8.03616	7.33388	7.16314	6.48573	5.81936	5.40109	5.0121	4.32253	3.60809	3.0329	2.59363	2.32841	2.1085	1.86151	1.67586	1.58303	1.50623	1.43937	1.38301
5	1.91029	8.80486	9.18211	8.44089	8.39746	7.79013	7.21259	6.99148	6.62357	5.63827	4.47242	3.42359	2.72258	2.31087	1.94044	1.7301	1.54597	1.40813	1.34065	1.28824	1.21861	1.20102	1.1278	1.04919	1.03268	1.01186	15	1.32467	5.99884	7.25667	8.68059	8.52463	7.38495	7.2587	6.55517	5.54445	4.89089	4.2056	3.62834	3.2678	2.99165	2.61829	2.39819	2.27125	2.08828	1.98093	1.87088	1.74328	1.68319
6	1.82282	8.56418	8.69892	8.2426	8.26377	8.05088	7.4183	6.78613	6.48328	5.57634	4.67267	3.85447	2.99842	2.39556	2.04223	1.77886	1.55661	1.41169	1.31766	1.2395	1.20043	1.18252	1.16298	1.14507	1.12716	1.10965	16	1.58742	7.66593	7.6961	6.17515	5.6471	5.48114	5.17083	4.94412	4.9221	4.80018	4.60486	4.18649	3.59687	2.92365	2.35646	1.9279	1.59313	1.33664	1.19393	1.09321	1.01533	0.965173
7	1.91906	9.15533	8.691	7.94929	8.12225	8.3851	8.27747	7.20889	6.0695	5.04492	4.18386	3.35038	2.73914	2.27104	1.92265	1.653	1.49476	1.42697	1.33011	1.21907	1.1679	1.12598	1.08916	1.03591	1.00683	0.949805	17	1.72629	8.27984	8.20153	6.89703	6.75414	6.82558	6.60592	6.62626	6.47448	6.03617	5.47684	4.53234	3.49021	2.77859	2.39698	2.09621	1.91392	1.72934	1.66502	1.52137	1.42552	1.409
8	1.99683	9.56757	9.03608	7.69163	8.21676	9.45079	8.68986	6.78398	5.68619	4.90917	4.13252	3.34839	2.71808	2.23974	1.93807	1.68505	1.48518	1.36204	1.27969	1.19136	1.14083	1.1049	1.04876	1.02892	1.00197	0.968659	18	1.84124	8.90539	9.37892	8.09088	7.12278	6.78054	6.67219	6.2012	5.68497	5.14706	4.44791	3.8654	3.25993	2.82783	2.58309	2.29566	1.9362	1.74309	1.62519	1.52831	1.46777	1.38555
9	1.7887	8.44948	8.71545	7.9479	8.03576	8.39837	8.17193	6.86885	5.77023	4.96754	4.21276	3.5722	2.98995	2.51991	2.25714	1.97959	1.78311	1.63694	1.51754	1.42608	1.37257	1.2935	1.2312	1.14694	1.1118	1.0455	19	1.78288	8.6815	8.90875	7.69842	7.49421	7.23718	6.79333	6.23425	5.65425	5.01576	4.34004	3.91143	3.42467	2.89466	2.48554	2.2583	2.09025	1.89101	1.7017	1.60704	1.50388	1.44042
10	2.01135	9.6502	8.79451	6.90029	6.36058	6.73007	6.8038	6.41156	6.3926	6.12549	5.34058	4.41495	3.53693	2.76172	2.17988	1.83693	1.58835	1.44721	1.3975	1.32124	1.29681	1.28501	1.21507	1.18811	1.15819	1.13966	20	1.90967	9.44514	9.20067	7.79814	7.59687	7.84238	7.35946	6.47416	5.82498	5.35834	4.7696	4.02226	3.23565	2.56451	2.11216	1.81091	1.62671	1.45496	1.34566	1.28034	1.27825	1.22756
1	1.9394	9.56025	10.0456	7.82395	6.85882	6.63983	6.53149	6.10711	6.07948	5.97212	5.49997	4.73748	3.77931	2.93274	2.29057	1.86211	1.62883	1.47503	1.3712	1.30342	1.23972	1.19336	1.14659	1.13059	1.10589	1.08574	11	1.56698	7.89284	10.9075	9.23487	6.91777	5.6747	4.92736	4.51847	4.33639	4.29353	4.11406	3.76667	3.3356	2.94181	2.58417	2.37171	2.24983	2.14248	2.08843	2.06588	2.06793	2.05749
2	1.6118	7.88596	8.11284	6.94493	6.44614	6.32689	6.36287	6.3123	6.56368	6.47206	6.01788	5.11574	3.98447	3.08422	2.52888	2.17053	1.89075	1.69689	1.55865	1.45153	1.39155	1.33459	1.31024	1.25604	1.20497	1.15948	12	2.21923	10.801	10.214	7.67451	6.30135	5.8606	5.95403	5.79616	5.26004	4.68203	4.14527	3.76573	3.29663	2.83654	2.46731	2.18637	2.00981	1.88609	1.83647	1.78363	1.70308	1.60965
3	1.69072	8.029	8.19624	7.24333	6.97163	7.09801	6.92727	6.32945	5.8725	5.6771	5.35347	4.63892	3.86668	3.19188	2.61991	2.25764	2.08066	1.95976	1.89175	1.85108	1.77011	1.63134	1.45484	1.33695	1.23782	1.26154	13	1.89867	9.19497	9.39153	7.58248	6.71953	6.41638	6.40756	6.43404	6.54097	6.28229	5.68075	4.65622	3.52543	2.63974	2.09761	1.75542	1.56905	1.46313	1.43088	1.35755	1.25673	1.20174
4	2.15257	10.3794	10.2032	7.79965	6.71233	6.64857	6.77414	6.28494	5.43535	4.71034	4.06698	3.56401	3.17988	2.71252	2.29252	2.03212	1.89599	1.81027	1.69212	1.53201	1.40712	1.33518	1.26797	1.22491	1.16296	1.10043	14	2.00245	10.038	11.326	8.60465	6.92104	6.53141	6.12149	5.56668	5.13535	4.8478	4.57397	4.11026	3.3804	2.74273	2.30098	1.97062	1.75386	1.5991	1.48551	1.401	1.33844	1.2907
5	2.02631	9.38363	8.71047	7.221	6.74411	6.59098	6.58385	6.38794	6.09447	5.91109	5.51837	4.74264	3.81658	2.96304	2.34303	1.94321	1.69468	1.54112	1.42955	1.37303	1.34108	1.29914	1.24852	1.20478	1.19029	1.13892	15
6	1.75563	8.56071	8.18969	6.94888	6.87531	6.61031	6.27473	6.16327	6.19479	6.35488	6.18768	5.49388	4.36543	3.22605	2.44271	1.95464	1.63685	1.46506	1.35444	1.30546	1.2719	1.2371	1.22176	1.20766	1.18705	1.16866	16	1.6496	8.10789	8.0851	6.21979	5.05398	4.8179	4.82081	4.83584	4.69284	4.60462	4.7578	4.61334	4.0394	3.19158	2.42034	1.90942	1.56816	1.34614	1.19345	1.06984	0.967556	0.907447
7	1.79333	8.47477	7.86281	6.36252	5.8852	6.20268	6.71954	6.815	6.71185	6.45053	6.09438	5.27416	4.14085	3.19576	2.46562	2.04557	1.80713	1.62072	1.51661	1.47722	1.42719	1.41856	1.40421	1.32997	1.27693	1.23556	17	1.80635	8.76365	9.08637	7.45934	6.25666	5.89422	5.75433	5.66671	5.81186	5.70556	5.49557	4.87379	3.84313	3.00844	2.4366	2.1171	1.88871	1.74035	1.59315	1.53387	1.51342	1.51079
8	1.84495	8.86921	9.03625	7.97769	7.79045	7.90996	7.5768	6.4199	5.394	4.91614	4.40788	3.97238	3.32921	2.6692	2.14813	1.8004	1.59105	1.44718	1.36364	1.30346	1.27961	1.25523	1.21469	1.1765	1.14451	1.10702	18	2.0547	10.3021	10.8489	8.21427	6.64914	6.08877	6.01044	5.75134	5.29566	4.80835	4.48599	4.13199	3.63488	3.03761	2.52845	2.10591	1.76246	1.57793	1.46646	1.38737	1.34293	1.3226
9	1.86315	8.91894	8.75309	7.51497	7.11062	7.16336	7.27792	6.38087	5.58202	5.0445	4.57846	4.05439	3.38127	2.7102	2.34918	2.151	1.94045	1.76217	1.65413	1.59959	1.52681	1.48167	1.4347	1.40927	1.3465	1.27322	19	1.96185	9.47924	9.40924	7.79991	6.90108	6.40145	6.00391	5.66513	5.28384	4.8538	4.61378	4.41584	3.90746	3.19947	2.63317	2.27647	2.01311	1.81517	1.67058	1.5589	1.47639	1.40805
10	1.92275	9.18711	8.8242	6.90204	5.89754	5.48793	5.75993	5.75267	5.78068	5.91755	5.8972	5.35487	4.39975	3.46495	2.73144	2.22635	1.953	1.7855	1.65315	1.58272	1.54773	1.52844	1.52458	1.5063	1.47732	1.61424	20	1.90247	9.24985	9.47223	7.99751	7.26214	7.40213	7.21882	6.38528	5.65515	5.20498	4.89967	4.49043	3.74452	2.88007	2.22816	1.83239	1.58024	1.41757	1.31046	1.22239	1.18013	1.14389
NREM	WT Baseline																											Shank3 Baseline
Animal / Hz	0	0.78125	1.5625	2.34375	3.125	3.90625	4.6875	5.46875	6.25	7.03125	7.8125	8.59375	9.375	10.1562	10.9375	11.7188	12.5	13.2812	14.0625	14.8438	15.625	16.4062	17.1875	17.9688	18.75	19.5312	Animal / Hz	0	0.78125	1.5625	2.34375	3.125	3.90625	4.6875	5.46875	6.25	7.03125	7.8125	8.59375	9.375	10.1562	10.9375	11.7188	12.5	13.2812	14.0625	14.8438	15.625	16.4062
1	1.7196	8.39525	11.1713	10.3583	9.17752	7.7615	6.0236	5.05808	4.76584	4.50716	3.90756	3.369	2.99567	2.67102	2.43327	2.27676	2.12984	1.97522	1.81246	1.58982	1.38361	1.17464	1.00563	0.890679	0.773258	0.673422	11	1.46526	6.85545	7.54674	7.02464	7.44228	7.94704	7.4808	6.78083	6.08773	5.43898	4.86647	4.24092	3.72427	3.37479	3.20479	2.91097	2.49273	2.05714	1.70625	1.47615	1.3237	1.15592
2	1.19052	5.68221	7.92229	8.09846	8.26482	8.08974	7.14081	6.31976	5.85262	5.39638	4.83406	4.13669	3.65989	3.26689	2.92623	2.60302	2.27653	2.05612	1.85393	1.67932	1.48633	1.32822	1.16217	1.02245	0.930394	0.820111	12	1.4171	6.78824	7.95127	7.42787	7.66269	7.8085	6.9937	6.30076	5.66888	5.14947	4.68383	4.0806	3.59171	3.28505	3.09579	2.90841	2.6703	2.33499	1.9405	1.64041	1.44293	1.27175
3	1.69854	8.45898	12.3194	11.7011	9.72353	8.15551	6.84122	5.8857	5.11183	4.42375	3.72973	3.14882	2.68185	2.30437	2.0135	1.78858	1.61054	1.46306	1.30707	1.14579	1.00017	0.876783	0.771365	0.6854	0.613887	0.539502	13	1.51673	7.38591	9.5935	9.34438	8.92618	7.63504	6.33684	5.7252	5.63069	5.31776	4.57648	3.81429	3.25009	2.78936	2.46675	2.2475	2.07186	1.89394	1.73873	1.57456	1.38829	1.21814
4	1.19553	5.68132	6.78863	6.85309	8.051	8.87875	8.7853	8.06241	6.6673	5.37515	4.55373	3.83448	3.31021	3.06613	2.84422	2.57749	2.29144	2.01394	1.75592	1.50598	1.32811	1.17542	1.01671	0.892373	0.790211	0.705156	14	1.08211	5.05166	5.90427	6.25583	6.96992	7.50846	7.91625	7.86505	7.18159	6.1452	5.22035	4.48386	3.91698	3.57091	3.27466	2.87739	2.46914	2.11667	1.8602	1.62065	1.43184	1.28783
5	1.23534	5.85798	7.83247	8.53243	8.77856	8.36404	7.4699	6.76957	6.44262	5.86523	4.86141	4.067	3.41015	2.95079	2.67334	2.36383	2.03786	1.79504	1.5828	1.40459	1.23166	1.10736	0.988101	0.880264	0.794288	0.7034	15	1.7293	8.19841	9.07997	8.00308	8.09079	8.15596	7.76723	7.14354	6.48144	5.90213	5.4669	5.00807	4.76518	4.73241	4.59397	4.17583	3.52853	2.91452	2.47435	2.1168	1.85489	1.63841
6	1.9485	9.53689	12.5437	12.0216	10.3159	8.41003	6.95593	5.81982	5.07588	4.3429	3.65512	3.06069	2.53692	2.093	1.72475	1.48138	1.32018	1.18003	1.05207	0.940578	0.842701	0.754027	0.685745	0.62121	0.565107	0.515342	16	1.32032	6.26459	6.9371	6.26965	6.74912	7.1691	7.14917	6.80325	6.16287	5.43534	4.72209	4.08171	3.68939	3.51361	3.45799	3.33842	2.95919	2.55081	2.1927	1.90151	1.62251	1.4262
7	1.46902	7.13133	9.39594	9.07519	8.70312	8.3082	7.31928	6.43014	5.71231	5.02261	4.20764	3.51039	3.01474	2.70308	2.42325	2.17943	1.96707	1.79898	1.66032	1.5554	1.41028	1.26791	1.0936	0.977555	0.875265	0.78793	17	1.07164	5.06394	6.32661	6.4877	6.98986	7.29877	7.25101	6.91845	6.552	6.07897	5.45789	4.75934	4.18881	3.84729	3.51007	3.06732	2.6198	2.23413	1.93535	1.65218	1.47163	1.29516
8	1.33834	6.37138	8.60042	8.6581	8.42166	7.79467	7.20363	6.61824	5.93505	5.31673	4.65788	3.92724	3.37488	2.98442	2.63459	2.34925	2.0871	1.91691	1.73649	1.60273	1.42738	1.26907	1.11233	0.988314	0.886121	0.787046	18	1.05802	5.03338	6.25876	6.41058	6.90346	7.34055	7.32248	7.03056	6.42897	5.76588	5.15097	4.58297	4.1332	3.70593	3.36203	3.07581	2.72683	2.37374	2.04093	1.76739	1.59908	1.42919
9	1.42287	6.86522	9.4277	9.27085	8.57507	7.7092	6.4251	5.47615	5.15032	5.00178	4.60713	4.08943	3.51469	3.03493	2.70259	2.38575	2.11314	1.96921	1.82325	1.63519	1.46093	1.33519	1.18833	1.0381	0.933574	0.844315	19	1.16241	5.55129	6.51476	6.33514	6.70239	6.82629	6.74665	6.34952	5.73091	5.17731	4.77673	4.47309	4.15546	4.06565	4.13434	3.86199	3.221	2.69309	2.21199	1.87592	1.62239	1.43654
10	1.48414	7.21555	9.59089	9.86229	9.78807	8.46578	6.86994	5.864	5.3188	4.84439	4.19369	3.58441	3.07302	2.67207	2.43955	2.20804	1.91309	1.72515	1.57495	1.41829	1.26214	1.14068	1.02252	0.916397	0.816095	0.736056	20	1.5737	7.51187	8.52382	7.95834	8.65759	8.91608	7.48599	6.40645	5.51651	4.92258	4.347	3.77145	3.31136	2.981	2.74311	2.47482	2.1718	1.89089	1.64857	1.43488	1.24836	1.10898
1	1.38732	7.01883	10.7736	11.4752	11.381	9.40938	6.31212	5.14917	4.54095	4.18486	3.62576	3.15196	2.72208	2.50019	2.19608	1.76678	1.60648	1.66901	1.63911	1.50337	1.26131	1.11228	1.05224	0.970483	0.886357	0.70422	11	1.01026	4.69345	6.38289	7.18128	7.7386	7.93189	7.3038	6.64718	6.4468	5.97927	5.20986	4.55036	4.03086	3.66041	3.13715	2.75941	2.58536	2.26976	2.02029	1.73876	1.4685	1.28074
2	0.982673	4.71052	7.78552	8.89051	9.07668	8.69752	7.60096	6.63981	5.76098	5.19602	4.68666	4.1287	3.56087	3.0576	2.59057	2.28083	2.06937	1.88213	1.74313	1.63928	1.49454	1.3586	1.21762	1.10661	0.982135	0.860175	12	1.36468	6.47348	8.04877	7.83241	8.65571	9.41775	8.08323	6.52446	5.64491	5.0717	4.41186	3.78696	3.25636	2.82317	2.53908	2.28707	2.13581	1.93931	1.72487	1.52	1.37832	1.23639
3	1.48719	7.17329	12.3532	13.0983	10.9519	8.8026	6.88248	5.58751	4.88729	4.2672	3.60974	3.01819	2.53454	2.01038	1.77856	1.58376	1.43653	1.35837	1.22508	1.1374	1.02971	0.925525	0.854223	0.757171	0.657251	0.592526	13	1.40561	6.66686	9.65785	10.7351	10.6577	8.52789	6.52963	5.22577	5.54583	5.85708	4.42738	3.46086	2.84165	2.23067	1.98498	1.90379	1.81602	1.67103	1.53051	1.41113	1.2833	1.17778
4	1.1668	5.36301	6.96001	7.11043	8.04974	9.09428	8.87185	7.9032	6.62965	5.23198	4.39233	3.75218	3.36533	3.02687	2.78049	2.43142	2.23343	2.06294	1.80796	1.57743	1.36428	1.24353	1.09159	0.950272	0.817049	0.721937	14
5	1.10569	5.13036	7.65754	9.11182	10.2625	10.2068	8.39479	6.74053	6.04637	5.37506	4.50328	3.67558	3.09083	2.59501	2.21728	1.97798	1.76744	1.6005	1.47777	1.32853	1.19664	1.09589	0.996778	0.894525	0.815511	0.73499	15	1.29247	6.26835	8.48077	8.49069	8.91401	10.1407	9.43724	7.92634	6.91181	6.02355	5.21125	4.7468	4.50587	4.25236	3.86822	3.38442	2.87401	2.62026	2.37957	2.01914	1.86892	1.65726
6	1.55181	7.90787	12.476	13.2017	12.421	9.62338	7.35419	5.59491	4.18447	3.49315	3.18743	2.85149	2.42308	2.03625	1.70801	1.36462	1.35102	1.26855	0.978561	0.956742	0.881725	0.772119	0.700631	0.619004	0.546105	0.546233	16	1.11345	5.313	6.60451	6.45089	7.22029	8.09494	8.15387	7.52008	6.85386	5.8593	4.89819	4.08658	3.41548	2.97957	2.80279	2.66177	2.45669	2.21686	1.99015	1.80591	1.57998	1.41323
7	1.3987	6.90806	10.201	10.364	9.90748	8.92201	7.23574	6.10111	5.24895	4.59215	3.9676	3.30537	2.81347	2.39271	2.06658	1.84395	1.69801	1.61512	1.56437	1.51727	1.37942	1.22361	1.1128	0.990792	0.866791	0.762847	17	1.03641	4.86881	6.3527	6.77923	7.84597	8.0863	7.30274	6.95523	6.42247	5.71303	5.15647	4.7075	4.09368	3.53712	3.19151	2.79667	2.44943	2.17428	1.98482	1.79331	1.53122	1.29456
8	1.07977	5.14516	8.20203	9.46175	9.67077	8.91624	7.47295	6.45802	5.70804	5.08115	4.40345	3.77303	3.25372	2.78755	2.35696	2.12025	1.95062	1.80402	1.73174	1.612	1.53182	1.36869	1.21206	1.07671	0.95696	0.864525	18	0.969756	4.60229	6.01117	6.56457	7.0698	7.37058	7.42049	7.3071	6.76684	5.94069	5.12854	4.541	4.05809	3.48236	3.22055	2.96443	2.54982	2.28889	2.05247	1.84538	1.66982	1.47674
9	1.24133	5.95905	9.09217	9.93341	9.54171	8.42218	6.76323	5.51114	4.87945	4.71033	4.48237	3.95359	3.43219	2.90379	2.47891	2.23104	2.05065	1.90156	1.76511	1.65444	1.50547	1.33297	1.21592	1.10638	0.989336	0.942266	19	1.02805	4.87719	6.39457	7.0022	7.62879	8.18223	7.50073	6.66343	5.83024	5.39156	4.86926	4.29149	3.78885	3.5432	3.30419	3.05953	2.75246	2.31265	2.15105	1.91403	1.58573	1.39172
10	1.33769	6.10762	9.17216	10.3386	10.8093	9.90164	7.45966	5.70673	4.95094	4.62342	4.04614	3.45239	3.00219	2.45834	2.26892	2.01181	1.80568	1.66094	1.53387	1.38724	1.20955	1.1555	1.05771	0.967974	0.829285	0.744768	20	1.3309	6.4157	8.27995	8.0431	9.31553	11.3677	9.18341	6.51918	5.46172	4.55462	3.87224	3.4174	3.02291	2.65163	2.37353	2.10134	1.8898	1.70042	1.52823	1.36037	1.20387	1.08231
REM	WT Baseline																											Shank3 Baseline
Animal / Hz	0	0.78125	1.5625	2.34375	3.125	3.90625	4.6875	5.46875	6.25	7.03125	7.8125	8.59375	9.375	10.1562	10.9375	11.7188	12.5	13.2812	14.0625	14.8438	15.625	16.4062	17.1875	17.9688	18.75	19.5312	Animal / Hz	0	0.78125	1.5625	2.34375	3.125	3.90625	4.6875	5.46875	6.25	7.03125	7.8125	8.59375	9.375	10.1562	10.9375	11.7188	12.5	13.2812	14.0625	14.8438	15.625	16.4062
1	0.950598	4.41443	5.39302	5.93131	6.22901	6.22522	5.63777	5.71229	8.42374	11.3296	9.69625	6.41852	4.09517	2.99478	2.3067	1.84521	1.58572	1.45748	1.38031	1.32395	1.30769	1.26456	1.14957	1.05197	0.977455	0.89764	11	1.48175	7.90053	6.87997	5.35429	5.11142	4.36732	3.64173	3.67531	4.94391	7.57843	10.2396	8.88492	5.29917	3.62709	2.89848	2.71116	2.34342	2.17289	1.78534	1.57218	1.49941	1.5218
2	0.821942	3.95761	5.46301	6.40351	6.32082	5.71408	5.1153	5.09903	6.42012	9.56442	10.8354	8.45588	5.10534	3.36282	2.50568	2.05369	1.74517	1.50075	1.39647	1.32175	1.28588	1.2716	1.20087	1.09127	1.0036	0.984006	12	1.39003	6.67818	7.05452	6.01829	5.28493	4.86735	4.6012	4.55544	5.47697	7.98959	9.66058	7.87295	5.16636	3.39677	2.5313	2.11436	1.84563	1.75928	1.64071	1.58593	1.58013	1.51247
3	1.25938	5.87117	7.15324	7.94677	7.42762	6.66798	6.07942	6.01165	6.68345	7.68259	6.7805	5.00691	3.69424	2.88426	2.29076	1.97888	1.81011	1.68838	1.70582	1.66667	1.54922	1.46236	1.32452	1.25016	1.12877	0.995197	13	0.904644	4.33194	6.45701	7.18762	6.22836	5.28877	4.41221	5.08622	8.29526	12.4182	11.4282	6.76747	3.85098	2.57462	2.01206	1.65383	1.45703	1.37034	1.23877	1.15143	1.1114	1.09017
4	1.56331	7.11103	7.31061	6.79116	7.0867	6.63168	5.52384	4.84671	5.07603	5.76307	6.26045	5.68333	4.46827	3.61949	3.03742	2.34046	2.16836	2.12826	1.95842	1.81921	1.67729	1.61152	1.56556	1.41779	1.31732	1.22272	14	1.55448	7.38226	8.31616	8.33079	7.7468	6.46907	5.24622	4.53177	4.52933	5.59735	6.24108	5.10845	3.60639	2.89682	2.51887	2.24089	2.08727	2.09824	2.08483	1.95804	1.82514	1.69469
5	1.04805	4.9721	5.24359	5.09256	5.06199	4.74892	4.24079	4.95162	7.28343	10.9788	12.0819	8.45988	5.08675	3.35234	2.35963	1.79831	1.65186	1.53722	1.4831	1.44702	1.40575	1.30731	1.23424	1.11928	1.05233	1.00127	15	1.23956	5.94249	6.75652	6.0543	5.63554	5.09	4.37924	3.86148	4.32369	6.39046	9.17226	9.39517	7.00472	4.42553	3.09018	2.38476	1.90403	1.78474	1.6715	1.53476	1.4899	1.43256
6	0.93623	4.40567	5.31953	5.59442	5.93171	5.42136	4.79328	5.17855	7.93838	11.4178	11.2768	7.53664	4.82213	3.18483	2.33513	1.84862	1.61258	1.42421	1.31649	1.24733	1.23644	1.16109	1.09958	1.09045	0.988913	0.881781	16	1.78	8.57871	8.87367	7.6221	8.00708	7.42961	6.22708	5.01431	4.42805	4.66812	5.29902	4.98357	3.63612	2.7432	2.38749	2.21842	2.00836	1.84075	1.75878	1.69364	1.578	1.55897
7	0.985333	4.83715	6.9298	7.34492	7.36276	6.69644	5.83904	5.8167	7.18228	10.0192	9.42873	5.98304	3.65076	2.63554	2.01551	1.60729	1.44594	1.37426	1.34581	1.3471	1.26337	1.15939	1.05717	0.975851	0.886655	0.809995	17	1.16367	5.84633	7.06667	6.97571	6.37819	5.28164	4.47959	4.09486	4.82663	7.60266	10.3641	8.95359	5.54745	3.5168	2.53819	1.96742	1.6948	1.57686	1.47569	1.38157	1.34899	1.33269
8	1.10652	5.12512	7.15399	8.28851	8.26733	7.34032	5.9394	5.20985	5.34592	6.96478	7.74207	6.31853	4.19919	2.90202	2.22059	1.79945	1.60378	1.4932	1.46555	1.43073	1.43467	1.4415	1.43611	1.34994	1.23613	1.18479	18	1.32515	6.16574	7.1162	7.0242	6.97745	6.64134	5.44752	4.61355	4.89104	6.81051	8.38645	7.03013	4.5208	3.13926	2.42475	2.04041	1.7503	1.68352	1.61897	1.63158	1.60858	1.53216
9	1.1779	5.69871	7.62347	9.00841	8.7729	7.23174	5.83561	4.94134	5.10061	6.90338	8.02909	6.05926	3.95965	2.63875	1.94407	1.73703	1.5232	1.39037	1.37003	1.41409	1.40257	1.37444	1.30463	1.25482	1.2067	1.09725	19	1.49929	7.04614	7.70829	7.13051	6.6671	5.92152	5.11438	4.60473	4.84909	6.00027	7.49424	7.09333	5.13563	3.59541	2.75484	2.31986	1.97145	1.66334	1.67459	1.59334	1.5246	1.47866
10	0.967467	4.45449	5.54127	6.37012	6.687	5.89814	5.06683	4.87348	5.50091	7.75728	10.1014	9.09215	5.82024	3.7874	2.71817	2.12829	1.69245	1.53419	1.47243	1.36119	1.2317	1.27978	1.24434	1.15801	1.15836	1.10292	20	1.39907	6.61711	7.27805	6.64493	6.06079	5.26777	4.28022	3.81529	4.16356	5.54827	8.4414	9.42968	7.06137	4.68806	3.24772	2.29497	1.7877	1.61205	1.50252	1.40735	1.3162	1.30406
1	0.726329	3.88121	4.3143	5.05883	6.12103	5.28759	4.43388	4.82954	6.09659	11.8604	13.8762	9.14073	4.29818	2.51642	2.08228	1.61071	1.67311	1.85664	1.40015	1.32528	1.4147	1.44278	1.31592	1.28628	1.25405	0.896863	11	1.03081	4.95449	5.58905	4.39601	4.53097	4.68315	4.34577	3.85764	4.39601	6.12312	9.91616	10.9771	7.48557	4.47928	3.34367	2.40761	2.26261	1.95682	2.09033	1.763	1.71849	1.8032
2	0.664	3.42001	4.83156	5.98043	5.02209	4.91448	4.70117	4.57141	5.88295	8.3788	12.2122	10.8354	6.54125	4.47519	3.08706	2.25595	1.69893	1.24191	1.03999	1.16722	1.25267	1.33496	1.32737	1.21026	0.98872	0.964034	12	1.36482	6.99294	7.3306	5.5446	4.86574	4.25086	3.59333	3.51869	3.72839	6.52023	12.0346	11.8676	6.73526	3.36585	2.14853	1.65094	1.67404	1.53187	1.36305	1.35772	1.38259	1.45723
3	1.04794	5.66832	7.04212	7.22958	6.75467	6.72274	5.61231	5.17443	5.58083	7.98822	7.63181	5.74839	3.95199	2.83971	2.29028	2.02275	2.0607	1.75104	1.80658	1.74225	1.73623	1.7353	1.53905	1.5932	1.39185	1.3377	13	0.923885	4.19491	6.16986	6.7725	6.13417	5.55995	4.84607	4.02753	5.88431	10.9428	14.6373	8.65146	4.23546	2.87735	2.03421	1.54766	1.34147	1.24964	1.19142	1.16854	1.10201	0.963045
4	1.57108	7.84731	8.40074	7.29692	6.7435	5.71976	4.91192	4.46999	4.4264	4.73251	6.01776	6.56916	5.12579	3.67735	2.93032	2.43771	2.1235	1.78293	1.90152	1.89949	1.86908	1.75759	1.60656	1.55993	1.34302	1.27815	14
5	1.00515	4.38728	4.58303	4.29022	3.96937	4.69573	4.65529	3.19879	4.60029	10.3594	17.5486	11.7329	5.20262	2.68058	2.03187	1.6269	1.26291	1.17609	1.37184	1.6517	1.61557	1.63391	1.4139	1.22408	1.15128	0.930734	15	1.14146	4.87795	4.84994	4.18768	4.80192	5.84634	7.07083	5.88735	4.71188	5.51721	7.511	9.34574	7.28591	4.84994	3.56443	2.48299	2.11685	2.03882	1.71068	1.33954	1.56062	1.45158
6	0.858743	3.72475	4.77288	5.29519	5.91356	7.06679	5.0854	4.85915	6.29666	9.54655	11.4268	9.51636	5.71123	3.56437	2.35821	1.69082	1.65514	1.4528	1.31046	1.28498	1.32693	1.13597	1.12029	1.13911	0.984221	0.90266	16	1.90622	8.10548	8.87511	7.37481	8.3263	9.60901	7.58589	4.14366	3.413	4.19887	4.09171	4.13392	4.19238	2.92589	2.00039	1.89323	2.01663	1.96792	1.75359	1.56849	1.29246	1.52302
7	0.925725	4.39003	5.81523	6.12095	7.10587	6.38061	5.0387	4.41871	5.26724	10.1991	12.2144	7.71031	4.01961	2.73232	2.26244	1.72605	1.49294	1.57074	1.57318	1.74649	1.67814	1.32421	1.14266	1.12863	1.03557	0.980036	17	1.21704	5.6351	6.53849	7.03409	6.06069	4.85591	4.2282	4.12616	4.62334	6.76908	10.7117	10.6658	6.66308	3.48975	2.44358	1.83565	1.67981	1.48284	1.46781	1.38356	1.22258	1.24829
8	0.834044	3.76556	5.7996	8.23732	10.069	8.92986	6.15579	4.4311	4.6601	6.46124	8.34271	6.22735	4.08337	2.82807	2.38373	2.07763	1.52821	1.50186	1.56074	1.57213	1.67199	1.63458	1.55749	1.35841	1.19902	1.12908	18	1.09363	5.39124	6.72502	6.45993	6.30399	5.71455	5.16254	4.25187	4.07202	5.72391	9.25639	9.6691	6.47448	3.66659	2.73513	2.1592	1.83589	1.68515	1.68411	1.55625	1.4159	1.36496
9	1.11476	5.28862	7.09243	8.64533	10.5829	9.62259	6.96132	5.30971	4.63197	5.14998	5.81868	5.03432	4.06611	2.93176	2.08938	1.8509	1.6486	1.50092	1.3246	1.39807	1.45872	1.36077	1.35851	1.3182	1.24398	1.19689	19	1.36209	5.61041	5.39268	5.53066	5.42433	4.4977	5.91676	4.93696	4.67365	4.03691	6.41298	8.69664	7.79027	5.40534	4.761	3.08243	2.0634	2.5419	1.82921	1.6849	1.43425	1.51653
10	0.946538	4.09602	5.0561	5.87339	5.63407	5.70688	6.08166	5.58779	4.64238	6.14713	9.55512	9.98295	6.50893	3.54966	2.74761	2.26334	1.97774	1.81293	1.59054	1.54539	1.6532	1.54821	1.44379	1.43138	1.25697	1.36026	20	1.20781	5.5191	5.31387	4.06593	4.02685	4.34368	6.71424	9.0686	4.61298	4.52744	6.83498	10.313	8.84331	4.98296	3.2193	2.8289	1.71156	1.51795	1.4141	1.42783	1.23914	1.26308
[truncated: 4 more columns]

## Sheet: Fig 2 - fig sup 1 (#)
NUMBER / HOUR	WT Baseline										WT 5 h Sleep Deprivation										Shank3 Baseline										Shank3 5 h Sleep Deprivation														WT DIFFERENCE SCORES
Hr / Animal	1	2	3	4	5	6	7	8	9	10	1	2	3	4	5	6	7	8	9	10	11	12	13	14	15	16	17	18	19	20	11	12	13	14	15	16	17	18	19	20				Hr	1	2	3	4	5
WAKE	WAKE										WAKE										WAKE										WAKE													WAKE	WAKE
1	3	1	3	1	2	5	1	1	2	2	1	1	1	1	1	1	1	1	1	1	8	3	3	4	2	2	3	1	1	4	1	1	1	1	1	3	1	1	1	2				1	-2	0	-2	0	-1
2	2	1	2	3	3	3	2	4	2	2	1	1	2	7	1	1	1	1	1	1	1	1	4	5	7	0	1	2	3	4	1	8	1	6	2	3	7	1	1	3				2	-1	0	0	4	-2
3	6	3	3	6	3	4	4	4	1	2	2	2	3	2	2	1	1	1	3	2	5	2	5	4	3	3	2	4	1	5	1	2	1	14	4	5	4	1	1	3				3	-4	-1	0	-4	-1
4	3	3	3	2	4	3	4	3	3	2	1	1	5	2	8	1	1	1	1	1	7	2	6	7	2	3	2	2	1	2	1	1	2	8	6	4	3	2	1	5				4	-2	-2	2	0	4
5	2	2	4	1	4	6	2	4	2	6	4	3	6	2	6	1	1	2	1	1	2	3	5	0	1	1	2	4	1	2	1	3	2	10	6	8	1	1	2	2				5	2	1	2	1	2
6	3	2	6	3	4		3	4	3	2	6	1	5	3	5	5	3	5	3	2	6	3	7	1	1	2	3	2	1	2	2	2	1	3	2	3	1	3	2	1				6	3	-1	-1	0	1
7	4	3	2	5	2	4	1	4	3	2	5	4	2	1	2	2	2	4	3	1	5	3	4	2	2	3	2	4	0	1	3	1	2	2	1	3	1	4	2	1				7	1	1	0	-4	0
8	2	3	2	2	3	3	1	3	1	3	2	2	4	2	1	2	2	2	4	3	2	3	3	3	2	3	1	3	1	3	2	0	2	3	2	2	1	3	1	2				8	0	-1	2	0	-2
9	4	4	2	3	3	3	0	4	4	4	2	6	3	2	3	1	4	3	3	3	4	2	3	4	1	1	1	4	2	2	2	2	2	6	2	2	2	3	2	2				9	-2	2	1	-1	0
10	4	2	1	6	4	4	1	5	4	6	2	3	3	1	5	3	3	4	1	4	5	1	2	3	1	3	3	2	0	2	2	2	5	2	3	1	1	3	3	1				10	-2	1	2	-5	1
11	3	5	2	4	3	3	1	4	3	3	2	3	2	1	3	4	3	3	3	6	7	4	4	1	4	3	3	3	2	3	3	2	3	3	2	2	3	4	3	2				11	-1	-2	0	-3	0
12	9	5	9	8	4	4	4	6	7	4	2	4	3	4	6	3	4	3	7	7	4	4	3	3	6	2	2	4	3	2	3	4	3	1	3	2	1	3	3	2				12	-7	-1	-6	-4	2
13	2	1	2	1	3	1	1	2	2	1	1	1	4	2	4	1	4	3	3	2	1	2	3		1	1	1	1	1	1	1	1	3		3	3	2	3	3	6				13	-1	0	2	1	1
14	5	4	3	2	7	5	1	4	4	3	4	3	3	2	7	3	2	4	7	5	1	1	4		5	2	2	4	2	5	2	3	2		3	3	4	5	3	5				14	-1	-1	0	0	0
15	1	5	2	2	6	4	1	4	3	2	2	5	4	3	6	4	4	6	4	8	3	2	3		3	4	2	2	3	5	4	2	5		7	7	6	7	6	5				15	1	0	2	1	0
16	3	5	1	3	3	2	2	5	5	3	4	3	4	5	5	6	5	4	3	4	2	3	9		10	4	4	4	5	7	6	3	7		6	2	4	5	5	6				16	1	-2	3	2	2
17	1	6	4	1	1	3	1	3	3	4	2	5	1	2	6	5	2	4	2	2	1	2	4		1	1	4	2	3	1	3	3	4		5	5	4	1	2	4				17	1	-1	-3	1	5
18	3	1	2	1	2	3	2	3	2	3	4	4	2	3	6	3	4	3	3	5	1	4	4		6	5	1	1	1	7	3	2	5		7	3	3	1	3	3				18	1	3	0	2	4
19	4	5	5	2	5	4	1	8	6	4	3	2	1	1	4	7	1	5	4	2	3	1	9		3	2	1	1	1	1	6	1	6		8	1	1	1	1	2				19	-1	-3	-4	-1	-1
20	3	3	3	2	4	5	1	3	6	2	6	3	3	5	6	5	4	3	3	3	2	3	6		1	5	1	6	1	4	5	2	9		1	5	4	1	2	5				20	3	0	0	3	2
21	2	7	4	5	3	4	2	11	3	3	5	5	1	2	4	4	2	4	3	2	1	3	10		3	3	3	3	5	4	3	3	11		6	4	3	5	1	7				21	3	-2	-3	-3	1
22	4	5	2	3	5	3	2	5	5	3	3	3	1	9	4	3	4	4	3	3	1	3	10		4	7	1	7	3	3	2	3	6		3	8	2	5	3	4				22	-1	-2	-1	6	-1
23	2	6	2	6	1	3	2	5	5	5	3	2	2	2	2	1	1	7	6	3	3	2	7			6	2	3	2	4	1	2	4		6	8	2	1	2	6				23	1	-4	0	-4	1
24	3	3	1	2	2	1	2	8	3	1	2	1	1	2	1	3	2	2	1	3	1	1	4			2	3	1	7	5	3	2	3		3	2	4	1	1	4				24	-1	-2	0	0	-1
NREMS	NREMS										NREMS										NREMS										NREMS													NREMS	NREMS
Hr																																												Hr
1	7	15	9	3	6	6	1	2	3	2	0	0	0	0	0	0	0	0	0	0	12	14	9	5	5	4	10	0	3	3	1	0	0	0	0	0	0	0	0	1				1	-7	-15	-9	-3	-6
2	11	3	10	5	7	9	9	6	8	10	0	0	0	2	0	0	0	0	0	0	3	9	4	8	9	10	5	5	7	5	0	2	0	0	0	0	0	0	0	1				2	-11	-3	-10	-3	-7
3	12	6	5	9	8	11	8	8	6	5	0	1	2	1	1	0	0	0	2	0	8	12	12	10	9	10	6	9	9	8	0	1	0	2	1	3	0	0	0	3				3	-12	-5	-3	-8	-7
4	10	5	9	7	8	10	9	7	7	8	0	0	1	0	4	0	0	0	0	0	7	15	7	9	6	7	5	5	4	5	0	0	0	2	7	2	1	0	0	2				4	-10	-5	-8	-7	-4
5	13	11	11	10	7	12	7	8	7	9	0	0	5	1	2	0	0	0	0	0	2	8	11	8	5	3	8	8	5	5	0	0	0	5	3	5	0	0	0	0				5	-13	-11	-6	-9	-5
6	9	8	9	9	10		7	7	5	2	7	7	9	6	7	5	4	5	7	5	12	6	8	8	9	7	8	6	8	8	4	3	6	5	8	6	5	2	2	5				6	-2	-1	0	-3	-3
7	8	8	14	13	5	9	9	4	9	12	10	10	10	2	7	7	6	8	8	5	13	8	12	7	5	9	10	4	6	5	7	7	6	4	6	9	3	7	5	6				7	2	2	-4	-11	2
8	9	7	7	7	11	10	3	8	5	5	5	6	7	8	6	14	7	8	11	8	11	12	5	9	7	4	4	8	4	7	3	8	11	5	4	7	9	7	4	2				8	-4	-1	0	1	-5
9	13	7	11	10	8	15	9	6	7	8	8	9	10	5	7	6	7	7	6	6	4	15	8	8	11	8	8	10	10	6	4	6	4	9	5	4	6	7	5	7				9	-5	2	-1	-5	-1
10	8	10	8	10	8	12	6	8	4	7	8	6	6	3	11	8	5	9	5	4	10	13	5	7	4	7	8	4	9	7	2	8	12	5	6	9	5	3	6	5				10	0	-4	-2	-7	3
11	15	10	10	11	9	11	6	7	4	6	9	6	6	10	4	6	6	8	4	9	8	14	12	9	11	6	4	9	6	6	8	5	6	9	5	7	7	8	7	7				11	-6	-4	-4	-1	-5
12	12	11	12	11	5	11	7	7	7	5	14	9	7	8	7	6	6	7	7	8	9	8	7	10	11	7	7	5	5	3	5	7	4	4	6	5	6	11	8	4				12	2	-2	-5	-3	2
13	2	0	1	0	2	1	1	4	1	0	0	0	4	3	4	2	3	2	2	2	0	2	1		1	1	1	0	1	0	0	0	5		3	7	2	3	2	6				13	-2	0	3	3	2
14	3	4	3	2	6	8	0	2	3	2	2	5	4	2	6	5	2	6	7	7	0	0	5		7	2	4	7	1	6	3	4	4		4	5	4	8	5	7				14	-1	1	1	0	0
15	0	10	2	1	10	3	0	7	3	2	4	8	4	4	7	6	4	11	4	13	3	4	4		3	7	4	1	3	6	4	3	8		10	8	9	9	7	5				15	4	-2	2	3	-3
16	2	6	2	6	3	4	1	4	4	3	6	8	6	8	6	10	4	8	4	4	2	3	10		11	13	6	4	5	11	6	6	10		6	2	5	8	6	7				16	4	2	4	2	3
17	0	7	4	1	1	4	0	3	4	4	2	8	0	1	6	8	1	7	2	2	1	3	3		0	1	5	2	4	0	4	2	4		6	8	3	1	0	4				17	2	1	-4	0	5
18	4	2	1	0	4	2	1	5	5	4	10	7	7	4	7	3	7	9	6	9	0	3	5		9	6	1	0	2	7	4	3	8		8	9	2	0	2	2				18	6	5	6	4	3
19	5	12	8	4	9	6	1	15	10	8	5	1	4	1	7	15	2	9	7	1	4	0	10		1	1	0	0	0	0	6	1	10		7	0	0	0	0	2				19	0	-11	-4	-3	-2
20	5	5	5	2	5	12	4	9	9	2	9	6	9	6	10	11	10	7	4	8	1	5	7		0	7	0	9	0	4	5	7	10		0	9	4	2	4	5				20	4	1	4	4	5
21	6	12	5	8	4	8	5	11	3	6	8	6	7	2	8	11	5	8	12	4	0	6	11		4	4	4	6	10	6	1	8	16		9	7	3	4	2	9				21	2	-6	2	-6	4
22	8	11	3	6	8	12	7	8	10	8	12	6	6	11	7	10	11	6	5	5	0	8	8		8	6	0	9	5	7	3	6	12		3	9	4	4	7	6				22	4	-5	3	5	-1
23	5	8	1	7	1	6	2	10	6	3	7	4	1	3	2	0	2	11	8	3	3	3	4			10	3	6	5	4	0	7	5		11	10	3	0	2	7				23	2	-4	0	-4	1
24	2	3	0	2	3	0	2	14	3	0	3	0	0	2	1	4	3	2	0	4	1	8	5			2	3	0	8	5	2	3	3		4	3	6	0	0	6				24	1	-3	0	0	-2
REMS	REMS										REMS										REMS										REMS													REMS	REMS
Hr																																												Hr
1	6	9	5	1	4	1	0	1	1	1	0	0	0	0	0	0	0	0	0	0	8	5	5	2	1	1	5	0	2	2	1	0	0	0	0	0	0	0	0	0				1	-6	-9	-5	-1	-4
2	6	1	6	2	4	5	7	6	3	9	0	0	0	0	0	0	0	0	0	0	0	8	1	4	4	6	2	3	4	3	0	0	0	0	0	0	0	0	0	0				2	-6	-1	-6	-2	-4
3	6	3	1	4	3	6	4	3	5	2	0	0	0	0	0	0	0	0	0	0	3	6	5	6	5	4	4	7	7	3	0	0	0	0	0	3	0	0	0	0				3	-6	-3	-1	-4	-3
4	6	2	4	7	6	6	7	5	4	5	0	0	0	0	0	0	0	0	0	0	4	8	7	4	5	4	3	3	3	4	0	0	0	0	0	2	0	0	0	0				4	-6	-2	-4	-7	-6
5	10	7	6	6	3	5	6	5	4	2	0	0	0	0	0	0	0	0	0	0	1	4	8	6	5	2	6	1	3	4	0	0	0	0	0	5	0	0	0	0				5	-10	-7	-6	-6	-3
6	7	5	3	3	4		2	5	3	0	4	6	6	4	3	2	1	2	5	3	6	6	4	6	12	7	6	5	4	4	1	1	6	2	8	6	4	1	1	5				6	-3	1	3	1	-1
7	10	5	4	9	1	7	6	2	8	6	9	7	7	2	6	6	4	6	5	4	5	7	11	4	3	7	6	2	5	4	4	3	4	3	4	9	2	5	2	6				7	-1	2	3	-7	5
8	6	5	4	4	6	8	4	5	3	3	3	6	7	5	5	9	7	6	7	6	5	6	4	5	7	1	2	8	2	4	2	4	9	4	3	7	7	6	6	3				8	-3	1	3	1	-1
9	10	3	7	5	6	8	4	7	2	5	6	5	7	5	5	4	4	3	4	5	1	9	7	5	8	6	4	7	6	4	3	2	3	6	5	4	5	8	4	6				9	-4	2	0	0	-1
10	8	5	5	3	4	8	2	2	4	4	5	4	4	3	6	5	3	5	3	1	8	8	6	4	2	4	3	2	6	4	1	6	8	4	3	9	4	1	2	4				10	-3	-1	-1	0	2
11	8	5	5	3	7	4	4	5	2	2	5	4	3	7	4	2	4	6	4	3	3	3	5	3	5	4	4	7	3	3	6	5	5	7	4	7	5	6	4	3				11	-3	-1	-2	4	-3
12	3	5	4	4	2	5	2	2	1	3	6	4	3	4	3	4	4	4	2	3	2	3	6	2	3	3	2	7	3	1	4	3	4	4	6	5	2	5	4	3				12	3	-1	-1	0	1
13	0	0	0	0	0	0	0	0	0	0	0	0	0	1	0	1	1	1	1	0	0	0	0		0	0	0	0	0	0	0	0	1		0	7	2	0	2	1				13	0	0	0	1	0
14	0	0	0	2	1	0	0	0	0	0	0	2	2	1	1	2	0	2	2	1	0	0	1		0	0	1	1	1	1	1	1	1		1	5	2	4	4	2				14	0	2	2	-1	0
15	0	0	1	0	0	1	0	1	1	0	0	2	1	1	0	2	3	3	2	5	1	1	1		1	0	2	1	0	1	3	1	2		2	8	2	4	2	3				15	0	2	0	1	0
16	0	1	1	3	0	0	0	2	1	1	3	5	3	3	2	3	3	5	4	2	0	1	0		2	3	1	2	2	0	4	4	2		0	2	1	2	4	2				16	3	4	2	0	2
17	0	0	0	0	0	1	0	0	1	1	0	2	0	1	2	3	1	1	1	0	0	0	0		0	0	1	1	0	0	1	0	1		1	8	2	1	0	0				17	0	2	0	1	2
18	1	0	0	0	1	0	0	1	1	0	6	1	3	2	3	1	3	5	2	4	0	1	0		0	0	0	0	0	0	0	2	0		1	9	0	0	1	1				18	5	1	3	2	2
19	1	1	2	1	3	1	0	2	1	2	3	0	3	1	0	5	0	3	4	1	1	0	0		0	0	0	0	0	0	2	0	1		1	0	0	0	0	0				19	2	-1	1	0	-3
20	1	1	2	0	1	5	3	3	1	3	3	2	4	1	4	5	4	3	1	3	0	0	1		0	0	0	2	0	1	2	4	1		0	9	2	1	1	1				20	2	1	2	1	3
21	2	1	3	1	0	2	1	2	1	3	2	4	4	0	3	6	3	4	4	2	0	3	0		0	0	2	1	0	0	0	7	2		1	7	2	2	0	0				21	0	3	1	-1	3
22	1	2	2	0	2	7	7	4	5	2	1	4	1	3	4	5	6	2	2	2	0	4	1		1	1	0	4	0	0	0	3	4		1	9	2	2	2	2				22	0	2	-1	3	2
23	0	1	1	2	0	4	2	4	1	2	2	1	1	2	1	0	2	5	3	1	2	3	0			1	1	1	0	0	0	3	0		0	10	1	0	0	1				23	2	0	0	0	1
24	1	1	0	2	2	0	1	3	1	0	0	0	0	1	0	1	1	0	0	4	0	3	0			0	1	0	0	0	0	3	1		1	3	1	0	0	1				24	-1	-1	0	-1	-2
[truncated: 15 more columns]

## Sheet: Fig 2 - fig sup 1 (min)
MINUTES	WT Baseline										WT 5 h Sleep Deprivation										Shank3 Baseline										Shank3 5 h Sleep Deprivation														WT DIFFERENCE SCORES
Hr / Animal	1	2	3	4	5	6	7	8	9	10	1	2	3	4	5	6	7	8	9	10	11	12	13	14	15	16	17	18	19	20	11	12	13	14	15	16	17	18	19	20				Hr	1	2	3	4	5
WAKE	WAKE										WAKE																																	WAKE	WAKE
1	6.23333	6.26667	3.75	48.4	12.7667	8.4	52.3333	39.8	17.2333	20.4667	60	60	60	60	60	60	60	60	60	60	1.08333	3.23333	8.2	8.28333	25.2	17.9	2.28333	60	41.2	8.26667	51.4667	59.3333	59.7333	60	54.4	19.9	60	60	60	29.6333				1	53.7667	53.7333	56.25	11.6	47.2333
2	10.9667	53.7333	6.16667	13.4167	2.33333	2.95	1.16667	4.95	7.86667	5.36667	60	60	29.4333	7.9	60	60	60	60	60	60	56.3333	23.9333	9.45	1.73333	5.2	0	39.3333	12.7333	8.46667	4.86667	60	6.95	60	9.31667	29.9667	19.6667	8.4	60	60	19.2833				2	49.0333	6.26667	23.2667	-5.51667	57.6667
3	4.1	7.3	14.9667	3.26667	6.56667	3.45	4.71667	3.41667	17.0667	9.43333	29.8333	29.6333	19.2167	29.7667	29.7667	60	60	60	19.5333	29.9333	6.86667	7.06667	5.45	0.7	8.86667	5.8	15.5333	4.43333	2.26667	4.61667	60	29.7333	60	3.75	14.6833	11.1833	14.8333	60	60	18.5333				3	25.7333	22.3333	4.25	26.5	23.2
4	6.55	9.08333	4.66667	9.9	2.63333	4.03333	4.03333	3.86667	3.01667	10	60	60	11.4667	29.9667	7.2	60	60	60	60	60	5.18333	1.03333	4.51667	2.76667	15.3	1.35	5.2	14.4	22.5333	5.23333	60	60	29.5667	6.95	8.71667	14.3	19.7667	29.8333	60	11.6667				4	53.45	50.9167	6.8	20.0667	4.56667
5	5.56667	5.06667	2.31667	11.8	3.46667	3.06667	1.66667	4.2	4.23333	2.1	14.9	19.9333	8.98333	29.7333	9.16667	60	60	29.9667	60	60	22.9667	7.93333	4.11667	0	6.8	29.2	0.466667	6.68333	25.4	5.3	60	19.8	29.8667	5.11667	9.36667	6.98333	60	60	29.6	29.9667				5	9.33333	14.8667	6.66667	17.9333	5.7
6	7.43333	6.2	3.05	6.43333	4.21667		6.03333	4.53333	7.26667	26.4667	3.63333	5.13333	2.4	4.86667	4.5	3.53333	11.1333	5.88333	4.5	6.93333	0.8	1.68333	3.8	14.0667	0.533333	0.766667	7.16667	0.733333	0.466667	0.9	20.6667	20.0333	19	10.75	3.1	6.36667	1.2	12.7333	22.5667	8.86667				6	-3.8	-1.06667	-0.65	-1.56667	0.283333
7	2.8	6.66667	1	0.866667	14.6667	2.38333	0.6	4.68333	3.66667	3.36667	1.33333	3.06667	2.5	31.5333	3.06667	5.33333	7.26667	2.38333	5	20	0.8	4.83333	3.1	4.53333	14.5	2.9	0.566667	7.83333	0	5.13333	8.56667	26.3333	14.2	8.76667	26.9333	1.43333	41.3333	6.11667	13.5333	4.06667				7	-1.46667	-3.6	1.5	30.6667	-11.6
8	14.5667	3.61667	12.0667	8.96667	0.7	4.41667	32.2667	5.36667	15.6667	10.7333	13.5	8.3	4.38333	1.96667	13.4	2.26667	2.63333	7.13333	1.01667	5.75	2.06667	3.88333	10.4167	6.4	6.83333	12.8333	27	0.816667	42.2	7.95	10.6	0	1.03333	0.95	0.633333	2.23333	0.533333	6.43333	19.2	18.1333				8	-1.06667	4.68333	-7.68333	-7	12.7
9	4.61667	5.13333	3.56667	4.13333	4.13333	5.26667	0	3.5	4.85	3.16667	3.53333	3.2	5.21667	10.3667	4.48333	14.2667	1.46667	7.41667	5.48333	5.33333	10.1333	8.16667	5.75	0.95	0.466667	0.533333	2.2	1.43333	2.43333	3.46667	8.83333	14.8	10.4333	0.75	8.56667	13.3	9.13333	0.9	4.13333	2.03333				9	-1.08333	-1.93333	1.65	6.23333	0.35
10	3.18333	6.03333	23.3333	3.86667	3.88333	1.38333	23.2667	5.61667	6.36667	2.56667	21.8667	4.76667	4.35	18.7333	2.1	5.76667	7.53333	2.73333	33.1333	6.66667	0.916667	16.3333	12.9333	1.01667	31.6667	5.68333	2.26667	14.9667	0	9.13333	23.8	2.7	0.733333	17.7667	3.86667	0.533333	11.7333	13.6	5.96667	6				10	18.6833	-1.26667	-18.9833	14.8667	-1.78333
11	5.13333	4.9	11.8667	3.08333	2.16667	6.28333	27	5.3	5.21667	11.9	7.6	4.75	8.3	10.1333	7.06667	7.31667	5.48333	6.68333	2.73333	3.83333	4.55	3.23333	2.63333	12.8667	2.25	3.23333	9.76667	2.66667	11.9667	3.5	0.533333	6.5	8.66667	1	4.3	13.8667	5.88333	2.31667	4.68333	9.16667				11	2.46667	-0.15	-3.56667	7.05	4.9
12	2.8	5.13333	3.05	2.46667	8.36667	5.85	5.63333	5.23333	5.06667	8.66667	3.1	3.93333	9.15	3.16667	3.96667	6.35	6.73333	8.73333	3.65	4.38333	8.11667	8.31667	9.55	8.28333	4.53333	14.3	16.0667	7	11.35	12.6333	6.13333	3.16667	6.26667	20.4667	5.96667	7.03333	20.4	6.2	5.81667	8.06667				12	0.3	-1.2	6.1	0.7	-4.4
13	28.9333	60	29.6333	60	17.6833	59.8667	59.9333	24.2333	27.5	60	60	59.4	12.8167	23.9	12.7333	53.8	11.7167	16.7	17.8	26.0667	60	23	18		57.3333	53.4667	58.4667	60	59.9333	60	60	60	15.2167		16.1333	14.4167	26.7667	15.4833	16.1333	6.3				13	31.0667	-0.6	-16.8167	-36.1	-4.95
14	8.06667	10.45	15.6667	22.7333	4.93333	7.05	60	13.3833	11.4	17.1333	12.4667	9	12.5667	24.4	5.33333	10.1	25.1333	9.41667	4.75	7.6	60	60	9.58333		8.08333	22.3667	20.3333	10.3333	24.3	5.8	24.0333	10.7	19.6333		16.2167	15	7.38333	5.4	10.4833	5.98333				14	4.4	-1.45	-3.1	1.66667	0.4
15	60	6.61667	22	27.8667	6.66667	11.45	60	9.9	13.9333	25.6	21.5667	6.53333	9.73333	14.5	7.68333	8.2	8.56667	3.85	8.81667	2.86667	18.2	15.6667	16.15		15.6	9.48333	16.7333	27.5333	15.6667	6.53333	10.4	22.6	7		4.21667	3.63333	5.11667	3.95	6.33333	8.83333				15	-38.4333	-0.0833333	-12.2667	-13.3667	1.01667
16	17.3667	8.05	55.4667	7.96667	16.9	25.9	26.5333	7.43333	8.5	16.4833	5.2	6.4	6.51667	6.28333	7	3.73333	8.13333	8.86667	9.46667	9.05	26.0667	10.8833	4.75		3.58333	5.56667	9.58333	8.53333	7.5	5.48333	5.21667	3.06667	4.68333		7.13333	21.9333	12.3833	6	4.85	4.66667				16	-12.1667	-1.65	-48.95	-1.68333	-9.9
17	60	3.56667	10.9333	57.1333	56	16.5	60	16.0833	13.6167	8.31667	26.4667	5.45	60	25.1333	5.26667	4.4	26.2	8.26667	22.6	24	57.4	24.8667	12.8167		60	55.4	9.46667	25.2667	17.2	60	15.1667	18.0333	11.8167		8.6	6.46667	11.2	58	29.7333	10.85				17	-33.5333	1.88333	49.0667	-32	-50.7333
18	11.4	51.5333	28	60	24.4	14.7	23.9333	12.7333	20.0667	15.7667	4.9	11.0333	17.4667	14.8	6.16667	11.8	3.01667	9.4	12.2833	4.3	60	8.43333	12.6833		6.5	7.66667	57.2667	60	57.2667	5.03333	16.6667	17.1	8.53333		6.41667	10.2167	16.6	60	14.4167	14.5				18	-6.5	-40.5	-10.5333	-45.2	-18.2333
19	9.41667	3.75	6.2	21.1	3.13333	4.85	54.4	2.63333	5.16667	6.96667	10.0167	29.7333	44.5333	50.8667	8.28333	2.13333	54.6667	5.95	2.6	25.0333	16.7667	60	4.21667		19.3	28.1333	60	60	60	60	5.98333	53.2667	6.56667		6.25	60	60	60	60	26.5				19	0.6	25.9833	38.3333	29.7667	5.15
20	13.3	16.2833	11.2167	27.6667	8.05	2.95	33.9333	10.3333	5.43333	21.0667	7.46667	6.8	6	7.6	2.66667	3.73333	6.1	6.96667	12.3333	6.5	28.0333	7.73333	8		60	9.05	60	4.36667	60	8.51667	9.33333	14	4.76667		60	7.66667	9.75	49.8	22.6667	7.26667				20	-5.83333	-9.48333	-5.21667	-20.0667	-5.38333
21	8.96667	2.75	5.16667	6.93333	11.2667	5.93333	20.5667	2.93333	16.8333	12.8167	6.6	4.06667	23.0667	27.5	5.4	3.11667	15.4	5.61667	2.61667	21.3333	60	9.7	3.8		15.1667	15.3333	10.6667	14.9	5.71667	10.3833	19.5667	6.16667	2.73333		6.76667	11.3333	13.1	6.51667	50.6667	4.75				21	-2.36667	1.31667	17.9	20.5667	-5.86667
22	6.18333	4.61667	17.9667	13.5	4.4	3.83333	11.9667	7.53333	3.63333	8.4	8.23333	6.6	36.9333	2.76667	5.41667	4.13333	0.95	9.51667	13.6	8.7	60	5.41667	4.28333		10.4833	6.08333	60	3.08333	16.3	10.8	25.0667	3.61667	4.2		16.8	4.85	17.2667	7.6	10.15	10.7333				22	2.05	1.98333	18.9667	-10.7333	1.01667
23	21.8	6.01667	21.4667	6.83333	52.6	12.9333	25.7333	2.68333	8.6	8.2	11.0833	17.4	25.5	24.8333	19.0667	60	46.6667	3.03333	4.73333	14.8333	14.1667	18.9667	7.51667			6.86667	22.9667	13.2333	26.9667	10.1667	59.7333	7.3	12.5833		6.2	3.88333	23.9667	60	27.7667	5.48333				23	-10.7167	11.3833	4.03333	18	-33.5333
24	15.8	14	60	22.7	23.5667	60	22	2.55	14.0833	60	22.7333	60	60	26.7333	52.6667	9.1	23.0667	26.8	60	12.2333	56.8	19.8667	13.0833			28.8333	14.2333	60	6.15	6.41667	16.7333	23.7667	17.0667		16.8333	24.7333	10.8333	60	60	10.65				24	6.93333	46	0	4.03333	29.1
NREM	NREMS										NREMS										NREMS										NREMS													NREMS	NREMS
Hr																																												Hr
1	4.1	2.61667	4.53333	3.26667	5.03333	2.75	7.66667	9.4	7.8	9.13333	0	0	0	0	0	0	0	0	0	0	2.95	2.95	2.9	4.56667	1.43333	5.58333	4.26667	0	5.6	7.6	8.26667	0	0	0	0	0	0	0	0	0.2				1	-4.1	-2.61667	-4.53333	-3.26667	-5.03333
2	2.56667	1.4	3.83333	3.01667	6.41667	4.8	5.06667	5.48333	4.53333	4	0	0	0	1.63333	0	0	0	0	0	0	1.08333	2.36667	4.73333	5.08333	2.08333	4.86667	3.81667	5.9	4	6.7	0	0.633333	0	0	0	0	0	0	0	0.933333				2	-2.56667	-1.4	-3.83333	-1.38333	-6.41667
3	2.21667	5.46667	2.26667	3.73333	4.68333	3.48333	4.58333	5.03333	5.71667	7.08333	0	0.733333	0.9	0.466667	0.466667	0	0	0	0.7	0	2.73333	2.53333	2.01667	4.6	2.8	3.63333	3.73333	3.8	5.2	3.58333	0	0.533333	0	0.533333	0.866667	0.733333	0	0	0	0.816667				3	-2.21667	-4.73333	-1.36667	-3.26667	-4.21667
4	3.28333	5.86667	4.28333	3.35	4.91667	4.05	3.73333	5.78333	6	4.3	0	0	0.466667	0	0.5	0	0	0	0	0	2.71667	2.8	3.46667	3.68333	3.76667	6.68333	8.36667	5.25	7.98333	8.38333	0	0	0	0.5	0.966667	0.5	0.466667	0	0	0.7				4	-3.28333	-5.86667	-3.81667	-3.35	-4.41667
5	2.33333	3.7	3.01667	3.61667	5.8	2.95	6.53333	4.4	6.43333	4.75	0	0	1	0.533333	1.36667	0	0	0	0	0	5.26667	3.66667	2.8	5.95	8.76667	9.26667	5.83333	3.66667	5.53333	8.33333	0	0	0	0.783333	0.733333	0.65	0	0	0	0				5	-2.33333	-3.7	-2.01667	-3.08333	-4.43333
6	3.31667	4.8	3.6	3.7	3.75		4.95	4.81667	6.5	3.53333	4.03333	6.25	4.2	6.33333	4.61667	7.76667	6.11667	5.15	5.76667	8.36667	3.7	7.23333	3.05	4.6	4.5	6.96667	3.88333	8.03333	6.31667	6.05	4.11667	5.56667	4.7	4.65	5.18333	4.96667	10.0333	10.1	6.8	8.66667				6	0.716667	1.45	0.6	2.63333	0.866667
7	4.66667	4.15	3.2	3.16667	5.58333	4.36667	5.71667	9.21667	4.31667	3.6	4.23333	3.61667	4.26667	11.4	6.76667	5.96667	6.7	5.28333	4.68333	6.68333	3.43333	4.28333	2.71667	6.21667	5.23333	4.6	4.83333	5.81667	8	8.63333	3.91667	4.25	4.41667	8.66667	4.6	5.15	5.61667	4.33333	6.05	7.13333				7	-0.433333	-0.533333	1.06667	8.23333	1.18333
8	2.53333	5.93333	3.71667	4.85	4.4	3.43333	6.88333	4.63333	6.98333	4.43333	5.68333	5.93333	4.66667	6.1	6.36667	3.26667	6.23333	4.78333	4.18333	4.4	3.9	2.65	4.46667	3.43333	5	4.6	6.95	6.03333	4.05	4.3	11.0667	5.76667	4.15	10.0333	12.65	6.48333	5.51667	4.66667	8.41667	10.1333				8	3.15	0	0.95	1.25	1.96667
9	2.35	4.61667	3.41667	3.96667	4.91667	2.15	5.8	6.13333	5.13333	5.38333	4.4	3.28333	3.5	5.7	5.55	6.46667	6.5	4.7	5.75	6.06667	4.5	1.88333	4.16667	5.26667	3.95	6.41667	5.76667	4.6	4.63333	7.55	9.43333	3.7	8.38333	5.26667	6.78333	6.96667	5.73333	6.7	9	6.55				9	2.05	-1.33333	0.0833333	1.73333	0.633333
10	4.2	4.03333	3.56667	2.93333	4.78333	3.55	5.23333	3.56667	6.93333	5.68333	4.01667	6.56667	7.01667	12.8	3.78333	4.41667	6.15	4.6	4.6	7.66667	4.11667	2.36667	4.45	6.63333	5.8	5.4	5.65	6.53333	5.58333	4.56667	5.5	5.93333	3.76667	3.7	6.9	5.68333	8.16667	5.76667	6.16667	9.2				10	-0.183333	2.53333	3.45	9.86667	-1
11	2.1	2.73333	2.35	3.33333	4.86667	3.13333	4.55	4.48333	10	3.28333	3.36667	6	6.06667	3.78333	8.3	4.7	6.25	3.85	10.55	3.55	2.75	2.65	3.15	4.26667	4.03333	6.98333	6.38333	4.6	5.18333	7.15	6.11667	7.08333	4.66667	4.85	9.06667	3.81667	4.93333	5.11667	5.55	5.2				11	1.26667	3.26667	3.71667	0.45	3.43333
12	2.4	1.7	2.1	2.48333	4.91667	2.56667	5	3.56667	3.3	4.08333	2.38333	4.1	4.1	4.9	4.38333	5.6	4.5	4.08333	4.43333	3.23333	2.2	2.65	3.38333	2.91667	2.3	3.7	3.56667	4.8	4.41667	10.35	7.4	5.81667	8.68333	8.28333	6.06667	8.31667	5.85	3	4.35	9.53333				12	-0.0166667	2.4	2	2.41667	-0.533333
13	1.06667	0	0.6	0	3.06667	0.133333	0.0666667	2.65	5	0	0	0	2.13333	3.81667	2.1	2.33333	4	4.63333	2.33333	3.63333	0	6.36667	5.6		2.66667	6.53333	1.53333	0	0.0666667	0	0	0	2.56667		3.56667	2.18333	2.76667	4.5	4.7	3.2				13	-1.06667	0	1.53333	3.81667	-0.966667
14	6.43333	4.1	4.23333	6.2	3.81667	2.88333	0	3.2	4.8	4.3	4.6	6.01667	4.36667	4.66667	3.25	5.36667	4.16667	3.38333	3.61667	2.91667	0	0	3.8		2.66667	7.13333	4.61667	2.21667	10.8667	4.9	3.28333	6.43333	4.55		2.28333	2.46667	6.81667	3.48333	4.25	3.88333				14	-1.83333	1.91667	0.133333	-1.53333	-0.566667
15	0	2.36667	7.5	4.26667	1.58333	4.4	0	2.53333	5.33333	3.86667	3.91667	2.86667	4.98333	3.61667	1.83333	4.13333	5.43333	2.95	5.28333	2.48333	1.23333	6.61667	2.48333		3.81667	3	5.8	3.8	4.13333	4.18333	3.88333	4.28333	2.65		2.51667	3.86667	2.8	3.1	2.5	2.86667				15	3.91667	0.5	-2.51667	-0.65	0.25
16	3.93333	2.76667	1.9	4.61667	2.61667	1.88333	6.66667	5.28333	3.96667	3.23333	5.56667	4.45	5.16667	2.83333	3.73333	3.2	4.01667	2.28333	6.66667	5.13333	3.93333	8.41667	1.43333		2.06667	2.41667	3.28333	5.65	2.9	1.78333	4.2	7.38333	1.98333		2.8	7.03333	1.88333	3.13333	4.85	4.23333				16	1.63333	1.68333	3.26667	-1.78333	1.11667
17	0	5.38333	4	2.86667	4	2.38333	0	3.76667	4.26667	6.33333	3.4	3.71667	0	8.66667	4.28333	3.98333	6	3.48333	7.13333	6	2.6	3.36667	2.9		0	4.6	4.13333	4.13333	1.81667	0	2.83333	2.93333	2.53333		2.66667	2.93333	4.3	1	0	4				17	3.4	-1.66667	-4	5.8	0.283333
18	5.95	3.6	4	0	2.53333	7.93333	12.1333	4.01667	3.7	3.1	3.45	1.96667	3.21667	2.88333	2.88333	7.35	5.73333	2.65	3.26667	3.93333	0	8.61667	1.8		2.05	3.3	2.73333	0	0.9	3.33333	2.41667	8.03333	1.61667		1.71667	2.73333	5.1	0	8.16667	7.8				18	-2.5	-1.63333	-0.783333	2.88333	0.35
19	4.38333	3.06667	3.13333	3.95	4.23333	6.23333	5.13333	2.23333	2.53333	3.76667	5.15	0.533333	3.21667	7.6	3.5	2.13333	2.53333	2.73333	6.05	9.13333	1.81667	0	1.6		0.866667	3.73333	0	0	0	0	3.56667	6.73333	1.8		1.25	0	0	0	0	3.3				19	0.766667	-2.53333	0.0833333	3.65	-0.733333
20	3.93333	1.91667	4.73333	2.33333	5.1	3.13333	5.33333	2.56667	2.83333	8.23333	1.46667	6.1	4.1	3.43333	3.4	3.16667	2.91667	4.6	5.5	4.46667	3.93333	7.15	1.15		0	1.85	0	3.45	0	6.15	2.23333	3.88333	1.4		0	1.73333	4.41667	4.46667	3.41667	4.4				20	-2.46667	4.18333	-0.633333	1.1	-1.7
21	6.65	3.1	6.83333	2.78333	6.53333	3.96667	3.38333	2.08333	2.76667	3.16667	3.03333	5.76667	4.4	2.5	4.15	3.43333	4.78333	3.98333	3.61667	3.78333	0	4.7	1.43333		3.23333	3.16667	6.26667	2.06667	2.76667	2.85	1.2	4.11667	1.63333		1.83333	1.7	5.9	6.43333	4.4	2.85				21	-3.61667	2.66667	-2.43333	-0.283333	-2.38333
22	4.11667	2.66667	7.53333	3.08333	4.11667	3.3	3.96667	2.3	3.53333	3.68333	2.38333	5.73333	3.38333	2.9	4.7	3.96667	4.1	3.48333	3.56667	5.85	0	4.76667	1.43333		1.98333	2.65	0	3.58333	2.06667	3.76667	2.96667	7.26667	1.81667		2.1	2.2	5.83333	5.03333	3.78333	2.3				22	-1.73333	3.06667	-4.15	-0.183333	0.583333
23	2.93333	2.81667	16.5333	2.18333	7.4	2.73333	3.4	4.03333	2.38333	5.6	3.35	5.65	8	2.61667	10.2667	0	3.93333	2.88333	3.41667	4.6	5.01667	5.93333	0.916667			1.63333	3.93333	2.88333	0.833333	4.43333	0	5.5	1.51667		1.83333	2.26667	3.28333	0	1.96667	3.6				23	0.416667	2.83333	-8.53333	0.433333	2.86667
24	6	5.21667	0	6.13333	3.76667	0	7.56667	2.35	5.46667	0	4.75	0	0	3.06667	7.33333	7.75	4.21667	2.93333	0	5.11667	3.2	4.7	1.51667			0.9	4.81667	0	1.7	5.4	4.33333	3.26667	2.61667		2.28333	3.15	2.5	0	0	2.7				24	-1.25	-5.21667	0	-3.06667	3.56667
REM	REMS										REMS										REMS										REMS													REMS	REMS
Hr																																												Hr
1	1.31667	0.933333	0.983333	1.66667	0.866667	1.46667	0	1.13333	1.8	0.8	0	0	0	0	0	0	0	0	0	0	1.41667	1.05	0.983333	1.4	0.866667	1.33333	1.33333	0	1	1.66667	0.266667	0	0	0	0	0	0	0	0	0				1	-1.31667	-0.933333	-0.983333	-1.66667	-0.866667
2	0.966667	1.53333	1.06667	1.96667	1.81667	1.23333	1.5	1.1	1.86667	0.8	0	0	0	0	0	0	0	0	0	0	0	1.08333	1.6	2.08333	0.583333	1.3	0.633333	1.01667	1.4	1.6	0	0	0	0	0	0	0	0	0	0				2	-0.966667	-1.53333	-1.06667	-1.96667	-1.81667
3	0.8	1.35	1.46667	0.933333	0.7	1.01667	0.683333	1.48333	1.28333	2.63333	0	0	0	0	0	0	0	0	0	0	0.966667	1.11667	1	1.45	1.2	0.9	1.23333	0.6	1.36667	1.81667	0	0	0	0	0	0	0	0	0	0				3	-0.8	-1.35	-1.46667	-0.933333	-0.7
4	1.06667	1.56667	1.08333	1.13333	1.51667	0.916667	1.33333	1.33333	1.68333	0.85	0	0	0	0	0	0	0	0	0	0	0.95	1.23333	1.01667	1.4	1.15	1.95	2.03333	1.26667	1.33333	1.5	0	0	0	0	0	0	0	0	0	0				4	-1.06667	-1.56667	-1.08333	-1.13333	-1.51667
5	1.01667	1	1.83333	1.3	1.36667	0.95	1.5	1.28333	1.21667	2.06667	0	0	0	0	0	0	0	0	0	0	2.8	1.35	0.683333	1.53333	1.6	1.33333	1.4	3	1.76667	1.93333	0	0	0	0	0	0	0	0	0	0				5	-1.01667	-1	-1.83333	-1.3	-1.36667
6	0.7	1.56667	1.06667	1.86667	1.16667		2.96667	1.13333	1	0	1.51667	1.6	1.36667	1.53333	1.36667	1.36667	1.8	2.1	1.15	0.933333	1.55	1.7	1.6	1.06667	1.35	1.2	1.03333	1.8	1.6	2.01667	1.6	2.13333	1.55	1.53333	1.33333	1.55	2.03333	1.6	1.26667	1.16667				6	0.816667	0.0333333	0.3	-0.333333	0.2
7	0.816667	1.26667	1.76667	1.06667	2.2	1.25	1.06667	2.2	1.01667	1.16667	1.11667	1.56667	1.3	2.7	0.983333	1.06667	0.75	1.33333	1.23333	1.56667	1.63333	1.2	0.95	1.51667	1.28333	0.983333	1.46667	2.63333	2.1	2.33333	1.45	0.75	0.983333	2.33333	1.2	1.13333	0.866667	0.783333	1.2	1.83333				7	0.3	0.3	-0.466667	1.63333	-1.21667
8	0.833333	1.06667	1.41667	1.33333	1.33333	1	1.53333	0.95	2.26667	1.66667	1.13333	1.08333	1.05	1.08333	1.36667	0.816667	1.28333	0.966667	1.31667	0.966667	1.63333	1.16667	1.48333	1.35	1.33333	2.73333	2.3	1.06667	0.6	1.18333	2.63333	2.21667	0.883333	1.63333	2.55	1.08333	1.03333	1.13333	1.05	1.01667				8	0.3	0.0166667	-0.366667	-0.25	0.0333333
9	0.883333	1.96667	1.33333	1.1	1.16667	0.683333	1.23333	1.01667	1.43333	0.7	1.45	1.85	0.816667	1.86667	1.41667	1.6	1.63333	1.2	1.85	1.35	1.46667	0.683333	1.1	2.06667	1.63333	1.08333	2.21667	1.01667	1	1.61667	1.4	2.4	1.56667	0.9	1.45	2.76667	1	1.16667	1.6	1.23333				9	0.566667	-0.116667	-0.516667	0.766667	0.25
10	1.13333	1.01667	0.816667	1.61667	1.18333	1.15	1.93333	1.26667	1.3	0.95	0.533333	1.05	0.933333	0.733333	1.11667	1.21667	1.88333	1.15	1.15	2.66667	1.41667	0.766667	1.36667	2.11667	2.23333	1.06667	1.76667	1.63333	1.36667	2.03333	1.4	1.03333	1.05	1.05	1.96667	1.46667	1.73333	1.86667	2.2	1.68333				10	-0.6	0.0333333	0.116667	-0.883333	-0.0666667
11	0.95	0.95	1.11667	2.3	1.2	1.1	1.08333	1.25	2	1.3	1.13333	2.23333	1.48333	1.25	1.05	0.8	1.36667	0.966667	2.13333	1.43333	1.21667	1.55	1.2	2.1	0.766667	1.65	0.833333	1.21667	1.41667	1.83333	1.28333	2.26667	0.983333	1.7	1.23333	1.35	1.28333	1.33333	1.46667	1.35				11	0.183333	1.28333	0.366667	-1.05	-0.15
12	1.4	1.26667	1.4	0.616667	0.966667	1.18333	0.966667	1.2	1.06667	0.75	0.833333	1.28333	0.633333	1.6	1.66667	1.51667	1.1	0.883333	1.63333	1.13333	2.36667	0.7	1	1.83333	1.66667	1.5	0.8	0.883333	1.16667	3.2	0.983333	1.8	1.53333	1.51667	0.833333	1.21667	1.63333	1.23333	1.36667	1.8				12	-0.566667	0.0166667	-0.766667	0.983333	0.7
13	0	0	0	0	0	0	0	0	0	0	0	0	0	0.4	0	1.53333	1.13333	0.466667	0.933333	0	0	0	0		0	0	0	0	0	0	0	0	0.666667		0	0	0.466667	0	0.9	2.86667				13	0	0	0	0.4	0
14	0	0	0	0.633333	0.8	0	0	0	0	0	0	0.466667	2.06667	1.46667	1.26667	1.03333	0	0.333333	0.5	0.4	0	0	1.33333		0	0	0.6	1.8	0.533333	0.4	1.73333	0.866667	2.26667		1.73333	0.666667	1.53333	0.85	1.56667	0.966667				14	0	0.466667	2.06667	0.833333	0.466667
15	0	0	1	0	0	0.866667	0	0.933333	0.4	0	0	0.5	0.6	0.533333	0	1.1	1.33333	0.566667	1	0.716667	1.33333	1.26667	0.933333		1.4	0	1.1	1.13333	0	1.2	0.95	0.933333	0.733333		1.66667	1.46667	1.46667	0.916667	1.36667	0.466667				15	0	0.5	-0.4	0.533333	0
16	0	2.8	0.4	2.26667	0	0	0	0.5	1.33333	0.8	1.5	0.7	0.566667	1.33333	1.03333	1.33333	0.616667	0.666667	0.9	1.56667	0	1.66667	0		0.466667	1.06667	1.26667	1.43333	0.633333	0	0.766667	1.28333	0.5		0	2.06667	0.733333	1.6	1.45	0.666667				16	1.5	-2.1	0.166667	-0.933333	1.03333
17	0	0	0	0	0	0.666667	0	0	1	1.13333	0	0.8	0	0.6	1.33333	1.43333	1.6	0.8	0.533333	0	0	0	0		0	0	1.46667	1.13333	0	0	0.333333	0	1.86667		0.466667	0.95	1.13333	1	0	0				17	0	0.8	0	0.6	1.33333
18	0.933333	0	0	0	0.8	0	0	1.2	0.666667	0	0.633333	1.33333	0.533333	1.06667	0.8	1.66667	1.81667	0.983333	1.13333	0.733333	0	0.4	0		0	0	0	0	0	0	0	0.7	0		0.6	0.8	0	0	0.4	0.866667				18	-0.3	1.33333	0.533333	1.06667	0
19	0.4	0.266667	0.7	1.33333	1.61667	2.53333	0	0.433333	0.333333	0.566667	1.1	0	0.633333	1.53333	0	1.06667	0	1.13333	1.63333	0.8	0.866667	0	0		0	0	0	0	0	0	0.966667	0	1.13333		0.6	0	0	0	0	0				19	0.7	-0.266667	-0.0666667	0.2	-1.61667
20	0.0666667	0.266667	0.6	0	1.53333	1.21667	1.08333	0.633333	0.4	0.333333	0.366667	0.566667	0.8	0.4	2.13333	0.833333	1.16667	1.83333	0.8	1.1	0	0	2.06667		0	0	0	0.4	0	0	0.366667	0.833333	0.933333		0	1.53333	1.66667	1.26667	0.4	0.6				20	0.3	0.3	0.2	0.4	0.6
21	0.4	0.666667	1.46667	2.2	0	1.93333	0.6	0.766667	0.866667	0.55	0.766667	1.01667	1.08333	0	1.4	1.33333	1.35	0.933333	1.36667	0.8	0	0.7	0		0	0	1.33333	0.933333	0	1.06667	0	1.01667	0.433333		0.4	1.13333	1.46667	0.666667	0	0				21	0.366667	0.35	-0.383333	-2.2	1.4
22	0.266667	0.433333	0.733333	0	1.36667	0.933333	0.766667	0.483333	0.6	1.06667	0.733333	1.25	1.2	0.566667	1.2	0.933333	1.23333	0.233333	0.5	1.9	0	0.716667	1.46667		0.333333	0.266667	0	1.43333	0	0	0	1.68333	1.53333		0.466667	0.466667	0.433333	0.533333	0.6	0.633333				22	0.466667	0.816667	0.466667	0.566667	-0.166667
23	0	0.933333	0.533333	1.43333	0	0.933333	0.733333	1.15	0.666667	0.466667	0.5	1.86667	1	1.13333	0.933333	0	2.53333	0.933333	0.566667	0.666667	1.03333	0.6	0			0.666667	1.53333	0.533333	0	0	0	1.5	0		0	2.1	1	0	0	1				23	0.5	0.933333	0.466667	-0.3	0.933333
24	0.6	0.8	0	1.03333	0.766667	0	0.533333	0.683333	0.666667	0	0	0	0	0.4	0	0.333333	0.266667	0	0	0.483333	0	0.433333	0			0	2.4	0	0	0	0	0.883333	0.533333		0.333333	0.733333	1.33333	0	0	0.4				24	-0.6	-0.8	0	-0.633333	-0.766667
[truncated: 15 more columns]
