# Supplementary material for: Shank3 modulates sleep and expression of circadian transcription factors
Source: eLife journal article supplement (doi:10.7554/elife.42819), 2019-04-11
Supplement: supp [file elife-42819-supp-v1.zip › elife_poa_e42819_Figure_2_source_data_2.xls]

## Sheet: Fig. 2A rmANOVA
Repeated Measures ANOVA
		numDF	denDF	F-value	p-value
Wakefulness
Hours 1 - 24	(Intercept)	1	15	1852.48	<0.0001
	Time	23	345	30.299	<0.0001
	Genotype	1	15	1.107	0.309
	Time x Genotype	23	345	2.419	<0.0001
NREM
Hours 1 - 24	(Intercept)	1	15	902.336	<0.0001
	Time	23	345	25.002	<0.0001
	Genotype	1	15	1.232	0.285
	Time x Genotype	23	345	2.357	0.001
REM
Hours 1 - 24	(Intercept)	1	15	1124.44	<0.0001
	Time	23	345	37.134	<0.0001
	Genotype	1	15	0.149	0.705
	Time x Genotype	23	345	2.175	0.002
Posthoc Pairwise Comparisons (Sidak Correction)
Hour	p-value
	Wakefulness	NREM	REM
1	0.710827	0.770781	0.533561
2	0.308607	0.363991	0.163027
3	0.872748	0.902453	0.157085
4	0.868483	0.929002	0.699008
5	0.0268292	0.0431079	0.0775212
6	0.0125098	0.0263168	0.00179666
7	0.584848	0.886168	0.0521117
8	0.718922	0.734301	0.68544
9	0.727748	0.724808	0.918953
10	0.247151	0.435692	0.110229
11	0.463853	0.360795	0.910832
12	0.497039	0.3141	0.487522
13	0.787043	0.787043	-
14	0.893657	0.949861	0.28837
15	0.320813	0.389041	0.0226523
16	0.172301	0.0956708	0.777781
17	0.342208	0.323705	0.779861
18	0.644678	0.690583	0.0783597
19	0.000130492	0.000122496	0.0395914
20	0.40958	0.461184	0.15656
21	0.115553	0.128913	0.228245
22	0.0596785	0.0524493	0.421902
23	0.343002	0.343818	0.489647
24	0.971986	0.964389	0.268245

## Sheet:  Fig. 2 - fig sup 1 rmANOVA
Repeated Measures ANOVA
		numDF	denDF	F-value	p-value
Average Number Bouts / Hour
Wakefulness
Hours 1 - 24	(Intercept)	1	17	294.021	<0.0001
	Time	3	51	1.836	0.152
	Genotype	1	17	0.409	0.531
	Time x Genotype	3	51	0.998	0.402
NREM
Hours 1 - 24	(Intercept)	1	17	570.712	<0.0001
	Time	1.557	26.468	35.798	<0.0001
	Genotype	1	17	1.574	0.227
	Time x Genotype	1.557	26.468	1.83	0.185
REM
Hours 1 - 24	(Intercept)	1	17	422.074	<0.0001
	Time	3	51	139.028	<0.0001
	Genotype	1	17	1.207	0.287
	Time x Genotype	3	51	2.832	0.047
Average Bout Duration (min)
Wakefulness
Hours 1 - 24	(Intercept)	1	17	177.554	<0.0001
	Time	2.052	34.891	52.077	<0.0001
	Genotype	1	17	1.701	0.209
	Time x Genotype	2.052	34.891	2.617	0.086
NREM
Hours 1 - 24	(Intercept)	1	17	543.208	<0.0001
	Time	1.749	29.734	10.345	0.001
	Genotype	1	17	0.895	0.357
	Time x Genotype	1.749	29.734	4.077	0.032
REM
Hours 1 - 24	(Intercept)	1	17	765.455	<0.0001
	Time	1.897	32.243	113.393	<0.0001
	Genotype	1	17	0	0.996
	Time x Genotype	1.897	32.243	6.536	0.005
Posthoc Pairwise Comparisons (Sidak Correction)
Time Period	p-value
	Wakefulness	NREM	REM
	Average Number Bouts / Hour
Hours 1 - 6	-	-	0.963
Hours 7 - 12	-	-	0.883
Hours 13 - 18	-	-	0.31
Hours 19 - 24	-	-	0.003
	Average Bout Duration (min)
Hours 1 - 6	-	0.871	0.479
Hours 7 - 12	-	0.396	0.074
Hours 13 - 18	-	0.711	0.34
Hours 19 - 24	-	0.005	0.013
