# Supplementary material for: Shank3 modulates sleep and expression of circadian transcription factors
Source: eLife journal article supplement (doi:10.7554/elife.42819), 2019-04-11
Supplement: supp [file elife-42819-supp-v1.zip › elife_poa_e42819_Figure_3_figure_supplement_1.pdf]

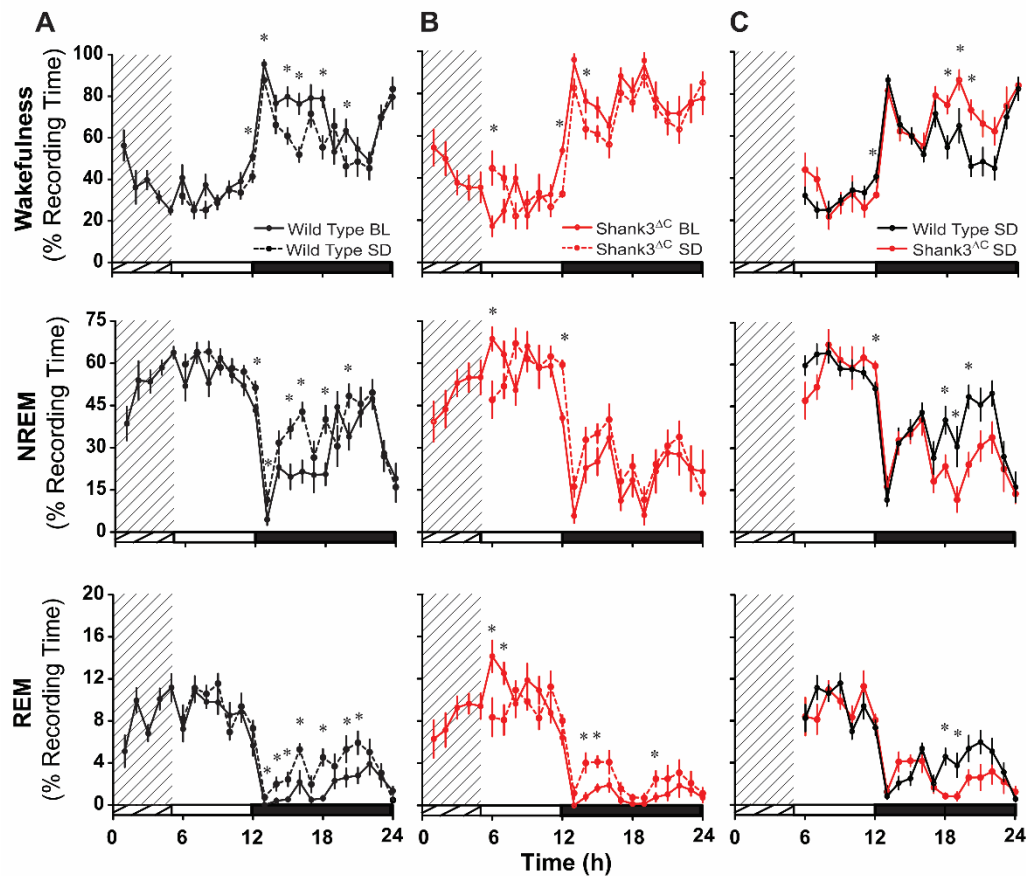

**Figure 3 – figure supplement 1.** Shank3<sup>ΔC</sup> mice sleep less than wild type type after sleep deprivation. The rows represent the vigilance states of wakefulness (top), NREM sleep (middle), and REM sleep (bottom). (A – B) Time in state shown as percentage of recording time per hour comparing baseline and sleep deprived conditions for wild type mice (A) and Shank3<sup>ΔC</sup> mice (B). **Repeated measures ANOVA with posthoc pairwise comparisons using Sidak correction; \*p < 0.05, difference from baseline.** (C) Time in state shown as percentage of recording time per hour after sleep deprivation. **Repeated measures ANOVA with posthoc pairwise comparisons using Sidak correction; \*p < 0.05, difference from wild type.** The cross-hatching for hours 1 – 5 denotes the 5 h sleep deprivation period, the open bars on the x-axis denote the light period, and the filled bars on the x-axis denote the dark period of the light:dark cycle. Values are means ± SEM for wild type (n = 10) and Shank3<sup>ΔC</sup> (n = 10) mice.
