# Supplementary material for: Shank3 modulates sleep and expression of circadian transcription factors
Source: eLife journal article supplement (doi:10.7554/elife.42819), 2019-04-11
Supplement: supp [file elife-42819-supp-v1.zip › elife_poa_e42819_Figure_3_figure_supplement_2.pdf]

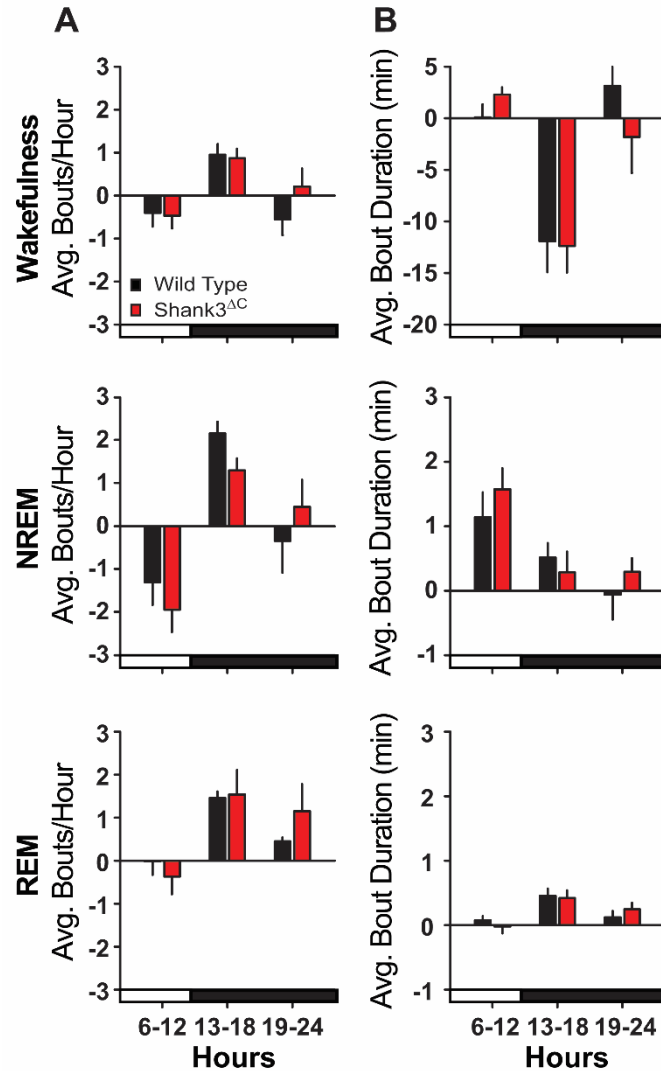

**Figure 3 – figure supplement 2.** Sleep bout analysis after sleep deprivation. **(A)** Average number of state-specific bouts per hour (difference scores) shown in 7 h (remaining light period) and 6 h blocks. **(B)** Average bout duration (min) per hour (difference scores) shown in 7 h (remaining light period) and 6 h blocks. Difference scores were calculated by subtracting baseline (BL) values from sleep deprivation (SD) values. Repeated measures ANOVA. Values are means  $\pm$  SEM for wild type (n = 10) and Shank3<sup>ΔC</sup> (n = 10) mice. Significance as  $p < 0.05$ .
