# Supplementary material for: Shank3 modulates sleep and expression of circadian transcription factors
Source: eLife journal article supplement (doi:10.7554/elife.42819), 2019-04-11
Supplement: supp [file elife-42819-supp-v1.zip › elife_poa_e42819_Figure_3_source_data_1.xlsx]

## Sheet: Figure 3A
%	WT 5 h Sleep Deprivation												Shank3 5 h Sleep Deprivation
Hr / Animal	1	2	3	4	5	6	7	8	9	10	Average	SEM	11	12	13	14	15	16	17	18	19	20	Average	SEM
1
2
3
4
5
6	177.569	191.216	176.66	216.993	246.237	225.206	237.055	193.853	164.87	202.004	203.166	8.65108	181.796	196.511	217.695	222.714	189.143	195.835	184.644	163.665	224.407	187.273	196.368	6.22688
7	148.659	152.014	136.962	165.63	193.928	163.051	166.054	140.924	119.741	149.595	153.656	6.36168	151.3	170.08	175.75	151.989	161.147	151.596	156.292	139.379	192.119	152.604	160.226	4.81461
8	133.627	131.968	120.309	151.124	174.977	136.343	137.895	124.861	110.115	130.996	135.222	5.61033	143.105	136.738	141.26	126.377	153.4	125.744	131.926	129.441	159.915	133.204	138.111	3.6118
9	117.205	131.807	113.879	140.666	155.103	130.752	118.201	115.264	101.553	112.874	123.73	4.98575	122.312	125.799	131.534	100.975	127.722	139.257	117.844	113.602	140.678	129.254	124.898	3.77611
10	88.9411	114.051	99.73	125.554	125.94	122.863	116.678	104.197	94.1821	114.96	110.71	4.18312	116.848	99.1319	108.355	93.0698	131.29	111.121	131.03	102.671	128.955	109.099	113.157	4.30151
11	99.589	113.458	98.7606	113.311	126.445	128.237	104.438	90.7967	95.5165	109.011	107.956	3.98518	105.596	96.6877	100.9	101.397	118.634	113.898	116.028	116.025	119.04	108.732	109.694	2.57811
12	87.7471	95.1637	81.8873	110.25	111.073	116.529	115.029	95.4308	93.0066	101.085	100.72	3.792	88.3498	96.9743	96.2725	89.9078	108.112	108.592	111.452	99.3789	117.768	104.895	102.17	3.02648
13	78.6847	90.2869	118.935	158.074	89.2671	115.607	105.132	103.35	99.6466	123.82	108.28	7.11653		78.6852	108.398		126.502	126.361	129.378	100.87	125.48	105.386	112.633	6.25008
14	119.867	125.933	106.602	154.376	90.5627	132.417	101.588	112.324	105.778	117.029	116.648	5.68992	108.124	117.303	112.211		117.597	120.253	123.151	97.6398	118.362	107.982	113.625	2.65114
15	129.066	105.133	117.352	151.475	86.6539	106.559	118.622	106.29	97.4862	108.096	112.673	5.67172	101.029	108.487	94.6872		122.11	123.153	113.929	92.1118	108.446	104.187	107.571	3.64279
16	108.338	103.759	93.1648	151.506	110.239	117.796	105.455	87.8745	99.6466	100.535	107.831	5.54647	104.78	91.2769	84.9614		115.127	111.615	124.236	89.8137	107.994	108.003	104.201	4.32871
17	126.463	96.0798		165.12	100.423	121.017	133.214	116.215	94.2139	120.47	119.246	7.34381	101.559	106.296	96.7866		108.417	129.508	126.878	75.3416	94.1525	126.565	107.278	5.99487
18	108.495	94.059	121.72	176.821	108.811	126.789	104.676	104.699	101.219	109.377	115.667	7.4199	109.714	121.601	92.6735		126.014	111.8	133.624		118.249	91.7206	113.175	5.302
19	93.6191	78.5936	98.282	157.213	118.671	113.218	76.8613	98.8026	96.7396	117.816	104.982	7.39018	105.759	119.41	104.027		114.974	117.538				158.969	120.113	8.1815
20	88.4322	133.908	103.78	177.714	109.426	107.428	105.041	108.503	88.5588	108.498	113.129	8.20467	99.7656	108.42	89.1602			136.418	139.946	111.242	120.424	130.484	116.982	6.37514
21	110.354	111.06	97.9384	203.826	115.553	106.143	96.1696	106.532	90.0044	100.719	113.83	10.2947	114.769	99.7556	96.6581		145.807	132.655	137.964	105.652	142.627	108.587	120.497	6.42992
22	89.6457	113.216	106.884	163.176	120.758	110.359	102.346	97.7651	94.1821	118.603	111.693	6.56731	113.994	97.2103	90.7027		114.273	143.637	119.542	92.2981	117.881	99.1404	109.853	5.6346
23	71.423	95.5678	102.43	176.375	125.786		89.4808	98.9236	93.8803	123.253	108.569	10.117	123.82	90.1138	89.2459			146.352	148.933		101.751	119.931	117.164	9.33737
24	109.16			193.91	151.765	153.479	123.83	118.67		116.095	138.13	11.3818	132.341	89.9452	127.721			143.884	132.233			115.691	123.636	7.69098

## Sheet: Figures 3B-C
Hr. 6-7	WT Baseline																											Shank3 Baseline
Animal / Hz	0	0.78125	1.5625	2.34375	3.125	3.90625	4.6875	5.46875	6.25	7.03125	7.8125	8.59375	9.375	10.1562	10.9375	11.7188	12.5	13.2812	14.0625	14.8438	15.625	16.4062	17.1875	17.9688	18.75	19.5312	Animal / Hz	0	0.78125	1.5625	2.34375	3.125	3.90625	4.6875	5.46875	6.25	7.03125	7.8125	8.59375	9.375	10.1562	10.9375	11.7188	12.5	13.2812	14.0625	14.8438	15.625	16.4062
1	150.877	152.722	174.433	182.288	164.841	133.133	124.587	119.774	110.81	105.467	105.13	111.533	114.967	112.197	107.083	106.262	104.736	100.567	98.9224	101.566	101.879	107.192	104.682	101.318	107.158	107.401	11	170.099	176.874	201.895	198.977	186.64	175.653	181.584	176.971	161.492	151.001	148.427	145.188	139.92	139.074	141.538	131.49	130.06	134.473	134.956	134.323	121.891	114.572
2	218.117	224.394	201.19	176.069	153.084	126.494	116.996	110.605	108.797	108.605	105.972	112.045	117.312	122.057	117.462	114.949	118.328	118.928	115.562	111.628	110.274	110.749	105.634	103.159	101.311	103.401	12	208.411	205.473	202.953	212.453	205.309	159.901	142.343	129.339	113.449	110.357	108.073	109.207	112.123	112.996	112.517	107.181	103.898	102.366	111.306	109.099	103.655	107.078
3	204.914	213.359	188.615	156.229	126.424	102.04	93.9515	86.2318	78.9909	77.8311	77.7846	75.603	76.5345	78.0829	77.1646	77.6182	78.7663	75.847	72.9548	73.0402	74.0337	74.9798	77.6921	77.9986	76.5512	76.8802	13	188.284	195.023	207.482	193.941	166.273	152.528	142.099	133.958	120.381	105.222	111.933	123.701	117.693	116.234	114.013	111.942	110.205	106.676	103.031	98.1879	98.8912	100.134
4	230.724	235.711	224.427	203.375	172.974	148.959	129.645	112.234	108.447	107.588	104.315	105.407	108.394	111.166	109.361	109.097	107.259	107.302	106.003	108.046	106.865	105.307	102.705	101.046	99.4568	95.5631	14	216.933	220.867	210.573	181.625	178.233	162.904	145.104	124.981	117.554	116.899	124.298	124.099	121.502	121.623	116.981	114.599	116.052	121.307	116.654	119.784	120.567	122.248
5	267.325	276.528	264.525	226.518	195.353	165.112	139.949	123.125	112.768	111.387	110.123	108.358	114.738	118.006	115.351	110.485	111.381	114.434	113.822	117.034	114.815	108.724	110.673	108.581	105.824	106.62	15	213.028	217.31	226.257	214.836	196.845	185.402	174.986	168.981	155.444	141.526	135.779	130.673	125.448	125.772	120.092	119.053	126.325	139.311	150.638	159.932	161.694	162.095
6	167.683	168.168	208.173	238.224	211.782	167.946	132.961	109.062	97.7959	95.8863	99.7334	98.319	97.4356	103.653	106.474	103.941	105.055	101.831	101.653	103.805	102.516	102.062	102.252	101.867	104	102.278	16	176.084	182.95	181.281	178.351	166.126	161.808	156.845	143.001	134.734	133.124	128.93	131.017	129.57	131.342	130.518	129.779	127.817	123.213	121.331	125.853	132.902	134.983
7	180.256	182.445	189.351	186.283	154.318	128.576	119.752	114.042	107.933	103.818	107.707	112.417	111.508	112.243	108.806	105.221	108.412	108.584	108.81	103.48	99.5609	100.078	98.1041	96.8637	96.6825	94.3411	17	202.595	198.533	182.686	173.085	162.237	147.478	145.827	138.663	131.257	127.933	125.396	124.695	133.66	129.497	124.091	124.172	122.929	122.039	123.859	123.806	121.145	123.737
8	159.458	160.181	154.928	151.981	135.848	115.411	94.7432	88.534	89.1012	86.4354	84.3368	87.7609	89.7171	91.0261	85.9429	85.8444	86.1772	85.7304	87.0883	83.9069	82.2167	81.0334	80.8542	80.194	77.9213	79.6639	18	165.418	155.224	159.44	155.432	146.604	143.872	142.471	133.252	125.461	123.378	117.805	112.299	119.326	120.649	122.776	125.467	124.479	122.618	120.822	131.034	127.592	128.831
9	177.244	176.78	185.326	191.354	177.47	145.807	124.932	121.396	112.976	110.787	107.988	108.687	114.827	119.903	117.602	112.688	114.169	115.209	110.639	108.344	107.376	101.886	97.0045	100.885	102.293	104.248	19	194.188	203.137	222.706	222.342	201.628	192.471	186.728	167.558	154.158	150.442	140.097	140.226	141.974	130.582	117.589	116.161	130.071	136.964	147.519	161.109	160.049	152.747
10	201.152	211.022	193.415	167.471	136.191	117.486	115.074	106.469	99.1183	97.3738	98.4331	99.9523	111.713	109.224	105.724	100.136	95.6908	94.8974	91.4095	87.5399	91.7309	90.3226	85.9599	82.9899	82.6121	86.7428	20	202.838	203.508	186.345	182.777	154.688	130.298	132.312	121.326	113.323	106.54	108.677	113.26	111.879	110.478	106.041	104.654	109.71	113.681	115.653	112.044	112.497	108.757
Hr. 11-12	WT Baseline																											Shank3 Baseline
Animal / Hz	0	0.78125	1.5625	2.34375	3.125	3.90625	4.6875	5.46875	6.25	7.03125	7.8125	8.59375	9.375	10.1562	10.9375	11.7188	12.5	13.2812	14.0625	14.8438	15.625	16.4062	17.1875	17.9688	18.75	19.5312	Animal / Hz	0	0.78125	1.5625	2.34375	3.125	3.90625	4.6875	5.46875	6.25	7.03125	7.8125	8.59375	9.375	10.1562	10.9375	11.7188	12.5	13.2812	14.0625	14.8438	15.625	16.4062
1	93.0634	92.6959	92.4828	93.9108	96.7141	92.4642	89.9402	97.721	97.3063	98.4699	106.045	109.422	108.027	104.78	107.834	107.902	98.2919	96.2753	97.6028	98.086	98.6412	100.685	105.562	104.952	109.402	108.746	11	117.976	115.778	107.686	96.7102	89.7707	80.7792	79.1451	80.236	83.8639	87.7974	88	91.303	91.0845	95.224	97.4237	95.6803	93.9577	94.4122	90.1163	91.0917	89.8507	91.4349
2	104.507	115.403	109.112	103.986	102.738	95.0283	90.3642	93.2292	96.2506	99.853	101.741	105.612	106.884	103.314	106.17	109.256	110.892	112.198	110.658	106.663	107.036	107.82	104.077	103.99	100.936	101.913	12	109.121	107.355	100.326	100.201	98.6096	87.5475	83.7161	82.1145	82.9144	83.5663	84.4921	87.0042	95.8106	95.9912	90.6351	85.4925	83.5853	83.6252	90.1451	91.8919	90.9645	89.2694
3	91.8618	95.6576	91.8073	88.4045	89.9352	86.6716	84.9505	83.8108	84.2955	83.4095	86.6135	85.3144	84.9847	87.3619	87.4299	84.7691	81.4631	82.4878	83.4143	85.4472	85.8904	86.0759	85.776	84.9539	82.9976	85.7939	13	98.6323	101.709	100.752	96.7326	93.7443	91.9184	93.3505	94.8828	92.2864	92.6328	94.708	96.6141	100.137	97.6808	96.5822	92.3808	94.6562	92.5158	92.469	90.4395	90.9649	91.2637
4	123.189	125.342	122.528	115.074	108.575	96.727	88.6352	89.3422	92.3031	92.0368	90.6037	92.1627	92.507	93.2576	91.8937	92.5926	93.0669	96.0019	92.7248	91.6347	92.987	94.7767	90.3918	88.2845	92.8183	91.8771	14	104.473	108.977	106.623	98.8549	90.3721	81.7306	76.4845	71.0037	71.6839	74.1411	76.1385	78.5579	79.4899	80.9797	81.761	86.1641	86.2167	83.1858	80.3753	80.3957	78.8247	77.9817
5	131.688	136.819	134.445	119.744	107.642	104.187	102.608	98.072	96.6745	98.4724	100.202	99.6657	101.456	107.121	103.633	106.418	105.074	102.999	106.401	107.652	105.291	101.606	101.504	103.713	99.684	105.407	15	111.256	117.899	117.324	111.171	109.645	110.634	103.671	99.1715	92.1036	94.363	98.6075	96.9177	96.3901	98.0511	96.9846	94.7444	96.834	99.3457	103.025	101.96	96.6443	95.2066
6	106.354	108.709	115.087	116.829	106.685	98.0203	101.474	97.3845	94.6323	96.2443	102.958	104.527	103.636	105.902	108.714	104.576	101.471	101.522	101.739	105.676	104.253	103.735	101.192	101.382	101.568	98.6565	16	115.396	119.777	116.176	111.005	107.308	103.218	99.7999	98.8456	96.0618	94.9643	93.9632	96.2779	99.2669	101.767	104.424	109.545	106.162	105.662	104.615	104.399	105.993	104.482
7	95.2489	90.8829	92.2075	96.1394	94.8531	90.8305	90.6701	94.5786	98.9456	101.209	101.219	104.633	104.735	105.709	104.424	104.387	107.898	111.2	106.964	102.721	103.952	106.618	105.507	102.212	106.307	99.8383	17	126.242	127.44	121.015	114.57	109.601	101.934	96.308	98.507	97.7694	95.7336	98.6551	97.7096	102.519	102.337	103.196	104.743	111.559	111.004	109.612	107.437	103.356	101.195
8	100.85	101.346	96.5209	91.7083	90.9496	93.5163	89.7601	87.7981	87.6563	90.329	90.4643	87.8737	89.0183	93.8849	94.3877	91.1703	93.4413	92.8016	92.2221	92.3414	93.4902	91.0657	89.5434	86.1223	83.9107	88.605	18	121.037	125.626	117.369	106.252	99.2738	96.8356	99.6785	93.9628	87.9032	90.5304	92.6416	94.0668	101.992	100.263	101.293	106.493	107.33	102.634	102.324	103.866	103.456	102.857
9	101.772	100.059	101.212	105.555	106.936	110.584	118.162	112.838	107.305	104.084	104.21	106.073	105.653	112.358	113.303	107.818	107.477	110.369	111.369	117.225	114.108	106.286	111.183	113.796	113.852	113.751	19	128.787	132.189	125.684	116.682	113.202	107.47	101.197	100.74	97.0254	97.6677	99.3675	100.429	102.585	98.6211	98.7057	106.175	119.787	115.788	110.064	112.138	110.969	103.187
10	122.896	128.233	128.067	121.355	119.206	116.365	113.295	106.708	102.279	101.001	102.785	104.53	104.748	103.049	96.4903	95.8176	99.316	98.5502	101.126	98.3569	98.6133	99.8573	100.223	97.2407	94.7286	97.3661	20	107.129	107.554	105.52	112.604	111.501	97.7165	96.6472	93.4343	96.17	96.3671	95.1743	99.4788	99.5639	97.3262	94.0453	92.8277	93.8993	95.8505	97.4796	98.2542	96.7409	97.5079
[truncated: 4 more columns]

## Sheet: Figure 3D
MINUTES	WT 5 h Sleep Deprivation												Shank3 5 h Sleep Deprivation
State / Animal	1	2	3	4	5	6	7	8	9	10	Average	SEM	11	12	13	14	15	16	17	18	19	20	Average	SEM
NREM	8.26667	5.13333	2.86667	4.66667	0.133333	4.4	14.5333	12.4	1.13333	0.933333	5.44667	1.54393	33.6667	40.8	19	0	5.4	2.66667	1.2	28.7333	44.4667	8.86667	18.48	5.43977
REM	28.1333	15	10.4667	22.4	32.4	22.8667	38.2667	22.5333	22.8667	11.3333	22.6267	2.79722	41.7333	51	22.2667	24.1333	9	7.46667	11.2667	36.4	53	24.0667	28.0333	5.31149

## Sheet: Figures 3E-F, 3-fig sup 1
%	WT Baseline												WT 5 h Sleep Deprivation												Shank3 Baseline												Shank3 5 h Sleep Deprivation
Hr / Animal	1	2	3	4	5	6	7	8	9	10	Average	SEM	1	2	3	4	5	6	7	8	9	10	Average	SEM	11	12	13	14	15	16	17	18	19	20	Average	SEM	11	12	13	14	15	16	17	18	19	20	Average	SEM
WAKE	WAKE												WAKE												WAKE												WAKE
1	35.4444	20.6667	26.4444	81.6667	45.2222	69.5556	87.5556	68.1111	59.5556	68.8889	56.3111	7.32077	100	100	100	99.6667	100	100	100	100	100	100	99.9667	0.0333333	18.7778	25.5556	47.7778	58.7778	85	62.4444	20	100	69.5556	56.3333	54.4222	8.60309	87.1111	99.3333	99.7778	100	89.5556	96.7778	98.3333	99.8889	99.2222	97.6667	96.7667	1.45442
2	42.1111	90.4444	27.5556	68.7778	17.8889	18.6667	9.22222	34.8889	30.5556	21.8889	36.2	7.9738	100	99.3333	95.6667	88.1111	97.4444	100	100	100	100	99.7778	98.0333	1.19476	93.5556	47.8889	64.8889	18.3333	63.4444	8.55556	67.8889	46.6667	44.7778	35.5556	49.1556	7.87704	100	88.8889	100	92.5556	97	94.4444	90.2222	98.4444	99.7778	94.6667	95.6	1.29812
3	46.1111	41.3333	76.4444	39.1111	37.4444	27.1111	35.8889	26.7778	32.3333	34.1111	39.6667	4.50289	98.2222	98.6667	93.4444	97.2222	97	100	100	99.6667	95.4444	94	97.3667	0.761208	60.3333	33.8889	50.2222	9.77778	49	32.7778	55.1111	35.4444	9.33333	41.7778	37.7667	5.52233	100	93.6667	100	85.2222	93.2222	91.7778	91.6667	98.6667	99.7778	92.5556	94.6556	1.53875
4	36.3333	47.8889	29.5556	41.8889	21.4444	26	30.3333	23.6667	20.5556	36.5556	31.4222	2.87331	98.5556	99	89.2222	95.6667	90.5556	100	99.8889	99.3333	99.2222	98.8889	97.0333	1.25392	62.2222	13.3333	46.7778	35.3333	53.2222	9.77778	20.8889	50.5556	39.6667	22.6667	35.4444	5.70628	100	98.5556	97.6667	90.2222	85.8889	91	94.8889	98.3333	99.7778	93.6667	95	1.49934
5	26.4444	23.6667	25.3333	27.2222	27.5556	34	11.4444	31.6667	19.4444	23.6667	25.0444	1.99239	93.8889	94.1111	87	94.7778	85.7778	99.1111	97.6667	98.8889	98.7778	94.5556	94.4556	1.49727	77.6667	45.7778	40.6667	7.66667	14.2222	49.4444	8.22222	48.2222	44.3333	19.5556	35.5778	7.12614	100	91.7778	97.5556	81.2222	89.2222	85.4444	97.3333	97.3333	97.5556	96.2222	93.3667	1.96827
6	41.6667	25.5556	37.4444	36.1111	32.4444		33.5556	33.1111	39.3333	88.2222	40.8272	6.12238	38.8889	14	24	25	37.4444	30.1111	55	49.3333	21.5556	26.2222	32.1556	4.06795	12.1111	13.7778	45.6667	29.4444	5.33333	6.11111	38.4444	6.66667	6.33333	7.88889	17.1778	4.74777	70.2222	67.4444	39.2222	56.6667	13.4444	35	6.66667	63.4444	74.7778	19.4444	44.6333	7.99532
7	26.3333	37.4444	18.5556	16.1111	50.8889	21.4444	8.55556	32.7778	21	17.3333	25.0444	3.89549	13.8889	22.7778	15.8889	54	13.2222	21.5556	28.7778	20	27.2222	35.1111	25.2444	3.87131	12.5556	33.1111	29.8889	21	51	18.5556	7.55556	53.1111	4.11111	12.8889	24.3778	5.4281	45	48.6667	50.4444	31.2222	46.2222	12.1111	68	42.2222	45.5556	11	40.0444	5.5413
8	55.1111	24.8889	48.5556	36.8889	8.44444	26.1111	56.2222	32.6667	29.3333	54.3333	37.2556	5.04322	49.1111	32.4444	35.2222	11.4444	26.1111	14.4444	14.3333	28.1111	9.55556	32.1111	25.2889	4.01302	16.2222	30.5556	53.2222	37.1111	25.8889	65.3333	47.4444	7.66667	71.7778	43.5556	39.8778	6.49943	36.7778	9	12.3333	6.66667	4.77778	13.1111	6.77778	34.8889	34.3333	61.5556	22.0222	5.96857
9	36.2222	39.5556	23.2222	27.7778	24.6667	35.7778	7.33333	28.5556	36.3333	24.8889	28.4333	2.98195	28.6667	35.3333	34.8889	37.3333	24.3333	25.7778	14.4444	40.4444	28.4444	29.8889	29.9556	2.38354	66.7778	41.6667	32.2222	13.7778	8	5.44444	11	14.5556	12.8889	14.5556	22.0889	6.0999	30.8889	53.8889	39.5556	13.2222	32.6667	45.3333	35.3333	8.33333	17	9.33333	28.5556	5.01069
10	27.5556	28.4444	45.7778	43	31.1111	15.5556	43.2222	50.1111	43.4444	28.7778	35.7	3.4526	43.7778	27.7778	25.6667	33.8889	20.6667	31.3333	40.3333	22.5556	58.1111	44.1111	34.8222	3.70671	11.3333	37.6667	48.4444	10.5556	54	32.7778	21.1111	51.8889	6.88889	33.2222	30.7889	5.58335	79.3333	15.5556	11.3333	62.5556	21.1111	5.22222	22.3333	70	30.7778	11.7778	33	8.5927
11	36.3333	45.5556	47.7778	28.3333	15.4444	36.7778	49	39.1111	30.7778	61.6667	39.0778	4.05798	42.3333	27	32.6667	22.7778	38.1111	48.8889	31.5556	37	16.4444	39.4444	33.6222	3.048	57.2222	33.4444	27.5556	28.6667	20.2222	21.3333	52.1111	18.4444	41.6667	21.5556	32.2222	4.36126	7	23.8889	46	9.11111	18	49	32	18.4444	25.5556	34.5556	26.3556	4.48319
12	47.6667	50.6667	50.7778	43.1111	58.5556	43.4444	41.1111	56.5556	60	58.5556	51.0444	2.24697	35.6667	31.5556	51	26.5556	41.6667	34.3333	47.8889	48.3333	44.6667	52.1111	41.3778	2.80452	60.8889	60	52.2222	48	49.2222	48.8889	56.8889	49.2222	58.6667	45.7778	52.9778	1.7691	32.4444	24.6667	33.4444	36.7778	33.3333	27.3333	39.8889	35.7778	33.5556	27.5556	32.4778	1.48639
13	95.6667	100	98.1111	100	88.3333	99.7778	99.8889	82.3333	91.1111	100	95.5222	1.96959	99.7778	99.1111	84.4444	80.7778	85.4444	89.8889	78	83	89.3333	88.2222	87.8	2.26936	100	77.3333	88.3333		95.1111	89.8889	97.4444	100	99.5556	100	94.1852	2.5778	100	99.8889	78.2222		82	73	88.8889	78.7778	79.8889	63.2222	82.6543	3.9971
14	68.2222	69.1111	79.7778	76.8889	61.1111	63	100	87.6667	76.2222	84.2222	76.6222	3.78533	83.3333	48	64.3333	82.4444	63.4444	52	84.8889	64.4444	55.1111	64.5556	66.2556	4.18912	100	99.8889	65.8889		69.7778	76.5556	70.5556	71	82.6667	51	76.3704	5.28466	80.3333	55.3333	67.5556		83.1111	76.5556	50.5556	48.4444	54.6667	51.6667	63.1358	4.61374
15	99.5556	56.7778	73.6667	93.2222	71.5556	75.8889	100	68.2222	73	86.3333	79.8222	4.5367	72.8889	58.5556	65.3333	75.4444	75.3333	56.7778	59	42.4444	62.5556	40.4444	60.8778	3.90316	91.6667	55	82.6667		79	65.6667	58.8889	91.1111	79.6667	56.4444	73.3457	4.8595	69.7778	77.3333	62		54.2222	44.7778	54.1111	48	63.7778	73.4444	60.8272	3.78721
16	86.5556	68	93.1111	42.7778	85.7778	86.8889	87.8889	62.1111	69.4444	80.8889	76.3444	4.92842	38.4444	36.7778	45.2222	54.2222	60.8889	42	68.4444	62.5556	49.2222	61.7778	51.9556	3.54416	88.1111	55.8889	73.3333		63.1111	43.5556	65.6667	58.1111	68.6667	65.7778	64.6914	4.10133	54	20.5556	59.8889		71.3333	73.3333	81.7778	51.8889	42	48.3333	55.9012	6.17688
17	100	39	72.6667	95.2222	93.2222	83.1111	100	80.8889	70.5556	57.2222	79.1889	6.28334	87.8889	47.7778	100	85	55.1111	40.2222	87.2222	57.7778	75.3333	79.1111	71.5444	6.30769	95.7778	83.7778	86.2222		100	92.4444	64	85.1111	87.6667	100	88.3333	3.67554	79.6667	90	79.7778		71.5556	58	75.6667	96.7778	97.8889	73.1111	80.2716	4.28587
18	56.5556	87.3333	93.3333	100	82.4444	73.6667	80.5556	65.8889	68.7778	79.4444	78.8	4.13463	37.2222	76.1111	60.1111	76.5556	63.6667	61.1111	25	52.1111	64.1111	38.4444	55.4444	5.40413	100	57.3333	85.5556		68.6667	66.8889	95.8889	100	96.5556	61.8889	81.4198	5.8706	84	60.3333	75.2222		74.6667	57.4444	83.8889	100	73.3333	73.2222	75.7901	4.26354
19	64.6667	38	54.4444	72.1111	29.5556	34.4444	89.6667	43.8889	56.4444	49.3333	53.2556	5.84475	52.5556	99.1111	75.6667	85.5556	60.6667	33.4444	92.1111	54.8889	20.3333	83.2222	65.7556	8.18398	86.2222	99.7778	68.4444		95.4444	94.3333	100	100	99.7778	100	93.7778	3.51603	61.1111	88.2222	68.5556		82.8889	99.4444	100	100	100	89.4444	87.7407	4.84729
20	67.3333	83.1111	59.2222	92.4444	57.8889	28.6667	59.7778	58.8889	56.5556	70.4444	63.4333	5.40755	75.3333	37.2222	34.5556	65.7778	30.2222	37.7778	44.1111	37.6667	62.3333	38.2222	46.3222	4.91643	93.7778	42.5556	78.8889		100	78.3333	100	47.1111	100	58.1111	77.642	7.73402	78.3333	50.7778	74.5556		100	67.7778	65.2222	84.2222	78.4444	60.8889	73.358	4.77633
21	33	36.7778	36.2222	60.1111	59.1111	44.1111	71.1111	56	84.7778	65.6667	54.6889	5.36485	58	35.8889	42.2222	91.7778	40.3333	24.8889	55.2222	42.7778	21.3333	72.8889	48.5333	6.82854	100	49.5556	66.4444		78.6667	79.2222	55.8889	77.2222	55.3333	74	70.7037	5.22908	97.1111	35.1111	54.7778		70.8889	78	66	55	86	58	66.7654	6.23118
22	46.4444	47.4444	61.7778	70.1111	40.6667	25.4444	45.1111	64.7778	37	48.6667	48.7444	4.28139	48.8889	35.7778	63.4444	45.8889	38.1111	27.1111	13.8889	66.1111	68.2222	46.3333	45.3778	5.53959	100	32.7778	74.4444		73.1111	73.7778	100	39.4444	82.5556	59	70.5679	7.85156	84.7778	22.7778	48.7778		86.2222	65.2222	61.4444	66.2222	57.6667	74.6667	63.0864	6.47202
23	75.3333	62.6667	74	68.7778	87.7778	67	85.6667	30.2222	72.8889	69.2222	69.3556	5.00808	62	61.7778	85.1111	83	65.4444	100	78.5556	38.7778	50.5556	74.7778	70	5.67513	72.3333	66.6667	86.3333			73.6667	78.1111	69.7778	92.7778	69.5556	76.1528	3.21489	99.5556	28.5556	86.5556			56	80.3333	100	93.3333	58.2222	75.3194	8.98891
24	78.6667	73.1111	100	76.7778	79.2222	100	75.1111	41	72.2222	100	79.6111	5.64122	77.7778	100	100	90.4444	88.3333	47.1111	78.5556	89.4444	100	63.4444	83.5111	5.48456	95	38.7778	88			95.3333	72.3333	100	74.7778	57.2222	77.6806	7.54181	85.2222	80	86.3333			83.5556	73.5556	100	100	72.7778	85.1806	3.68154
NREMS	NREMS												NREMS												NREMS												NREMS
Hr
1	51.3333	66.5556	65.3333	15.5556	49	28	12.4444	30.3333	37.1111	30.1111	38.5778	5.99686	0	0	0	0.333333	0	0	0	0	0	0	0.0333333	0.0333333	62.1111	65.4444	44.4444	36.5556	13.5556	35.3333	69.4444	0	27.6667	38.2222	39.2778	7.07582	12.4444	0.666667	0.222222	0	1.11111	3.22222	1.66667	0.111111	0.777778	2.33333	2.25556	1.17823
2	48.2222	7.22222	62.4444	25.1111	69.2222	70.7778	74.6667	53.7778	59.8889	67.2222	53.8556	6.89371	0	0.666667	4.33333	11.8889	2.55556	0	0	0	0	0.222222	1.96667	1.19476	6.22222	38.3333	32.1111	67.7778	32.6667	78.8889	30.4444	47.7778	46	56.7778	43.7	6.56258	0	11.1111	0	7.44444	3	5.55556	9.77778	1.55556	0.222222	5.33333	4.4	1.29812
3	46.5556	52.3333	21.1111	53.8889	58.1111	63.3333	59.6667	65.5556	57.4444	57	53.5	3.98317	1.77778	1.33333	6.55556	2.77778	3	0	0	0.333333	4.55556	6	2.63333	0.761208	34.3333	55.7778	41.1111	75.6667	41.2222	61.6667	37.1111	58	75.6667	49.1111	52.9667	4.75097	0	6.33333	0	14.7778	6.77778	8.22222	8.33333	1.33333	0.222222	7.44444	5.34444	1.53875
4	53.8889	46.4444	63.2222	45.4444	63.8889	66.2222	55.4444	65.2222	68.5556	56.6667	58.5	2.59705	1.44444	1	10.7778	4.33333	9.44444	0	0.111111	0.666667	0.777778	1.11111	2.96667	1.25392	31.2222	71	41.7778	55.2222	37.3333	77.5556	69.2222	43.1111	54.2222	68.4444	54.9111	5.10122	0	1.44444	2.33333	9.77778	14.1111	9	5.11111	1.66667	0.222222	6.33333	5	1.49934
5	58.7778	65.6667	56	58.6667	64.8889	59.2222	74.3333	57.8889	73.2222	69.2222	63.7889	2.11374	6.11111	5.88889	13	5.22222	14.2222	0.888889	2.33333	1.11111	1.22222	5.44444	5.54444	1.49727	17.6667	46	49.6667	77.3333	72.5556	46.1111	79	46.7778	46.7778	68.2222	55.0111	6.03255	0	8.22222	2.44444	18.7778	10.7778	14.5556	2.66667	2.66667	2.44444	3.77778	6.63333	1.96827
6	50.1111	62.3333	57.5556	54.8889	60.5556		56.8889	57.2222	56.1111	11.7778	51.9383	5.14865	50.4444	70.5556	62.8889	65.4444	55.7778	65.7778	42.1111	43.6667	70.2222	69.4444	59.6333	3.44974	72.5556	69.7778	44.2222	59.2222	68.7778	80.2222	51.3333	78.3333	83.2222	79.2222	68.6889	4.15505	27.1111	29.1111	46	38.2222	70.3333	50.5556	80.7778	33.6667	23.1111	71.2222	47.0111	6.52076
7	61.2222	53.3333	69.5556	67.8889	44.8889	64.5556	81.4444	59.7778	66.8889	71.7778	64.1333	3.20386	70.8889	59.5556	70.8889	36.3333	77.7778	69.1111	66.2222	67.6667	63	54.8889	63.6333	3.64709	74	53.7778	54.4444	68.6667	42.5556	69.8889	78.8889	38.1111	79.1111	71.6667	63.1111	4.69427	45.6667	47.6667	43	57.1111	45.8889	76.8889	29.3333	51.5556	50.1111	71.4444	51.8667	4.36942
8	36.4444	66.1111	41.6667	54.3333	78.7778	60.6667	33.7778	59.2222	60	38.2222	52.9222	4.68451	45.1111	56.8889	52.8889	79.4444	62.8889	75	71.7778	62.7778	76.3333	58.2222	64.1333	3.55728	70.1111	58.3333	37	51.6667	59.5556	29.7778	44.5556	78.6667	26.3333	48.7778	50.4778	5.32986	54.4444	76.6667	74.2222	82.4444	82.7778	74.4444	82.3333	53.6667	56.1111	33.3333	67.0444	5.28206
9	48.8889	50.8889	61.6667	62.4444	64.2222	55.7778	85.4444	59.8889	59.2222	69.5556	61.8	3.26228	56.7778	49	55.5556	47.5556	64.6667	64.1111	75.2222	53.6667	59.4444	58.8889	58.4889	2.57167	30.7778	49.5556	55.2222	69	71.3333	83.6667	74.6667	73.7778	77.5556	74.8889	66.0444	5.08251	62.1111	38.5556	52	77.6667	55.2222	46	56.3333	76.6667	72.8889	78.5556	61.6	4.51579
10	56.4444	63.7778	48.1111	49.3333	60.5556	69.7778	50.5556	45.6667	48.2222	65.3333	55.7778	2.71105	51.4444	65.6667	67.5556	62.4444	69.3333	59.3333	50.2222	68.3333	36.5556	51.4444	58.2333	3.35427	70.1111	52.4444	38.1111	75.7778	38.5556	60.4444	70.2222	43.1111	79.8889	54.3333	58.3	4.87163	18.5556	74.6667	76.2222	30.6667	69	83.8889	67.2222	26.8889	61.7778	78.2222	58.7111	7.58298
11	50.8889	46.6667	44.1111	59.4444	71.2222	56.1111	44	51	62.8889	34.3333	52.0667	3.38192	49	58.3333	60.2222	62.8889	55.1111	48.4444	59.8889	53.3333	69.5556	53.3333	57.0111	2.0561	37.1111	57.3333	61.8889	61	73.4444	68	42.7778	67.2222	51.8889	69.4444	59.0111	3.76284	80.1111	58.1111	46.1111	71.2222	73.7778	44.6667	58.3333	68	65	58.6667	62.4	3.63281
12	44.7778	39.1111	39.8889	52.5556	38.3333	47.2222	55.2222	39.7778	38.2222	37.8889	43.3	2.0185	56	59.7778	45.4444	62.4444	50.5556	55.7778	45	45.8889	50.1111	42.2222	51.3222	2.17521	31.3333	35.7778	38.3333	45.5556	42.4444	44.6667	41.1111	42.3333	35.4444	48.8889	40.5889	1.69086	60.6667	66.6667	56.5556	53.3333	59.1111	67.1111	55	55	57.6667	63.8889	59.5	1.56569
13	4.33333	0	1.88889	0	11.6667	0.222222	0.111111	17.6667	8.88889	0	4.47778	1.96959	0.222222	0.888889	15.5556	18.5556	14.5556	7.66667	20.1111	16.2222	9.11111	11.7778	11.4667	2.19157	0	22.6667	11.6667		4.88889	10.1111	2.55556	0	0.444444	0	5.81481	2.5778	0	0.111111	20.6667		18	27	9.55556	21.2222	17.1111	32	16.1852	3.69114
14	31.7778	30.8889	20.2222	21	37.5556	36.7778	0	12.1111	23.7778	15.7778	22.9889	3.73128	16.6667	50.5556	28.8889	15.1111	34.4444	44.5556	15.1111	34.1111	43.5556	34.5556	31.7556	4.03747	0	0.111111	31.8889		30.2222	23.4444	28.6667	26	16.4444	48.5556	22.8148	5.1655	16.7778	43.6667	28.6667		14	21.5556	44.7778	45.8889	34.8889	45.3333	32.8395	4.32688
15	0.444444	43.2222	24.6667	6.77778	28.4444	22.6667	0	30.2222	26.3333	13.6667	19.6444	4.44743	26.7778	39.7778	33.6667	23.7778	24.6667	39.8889	34.6667	54.6667	34.5556	54.4444	36.6889	3.47287	6.11111	43.2222	16		18.6667	34.3333	37.8889	7	20.3333	41.5556	25.0123	4.83484	25.4444	21.1111	35.5556		39.8889	50.3333	41	45.8889	31.8889	24.2222	35.037	3.38281
16	13.4444	27.3333	6.22222	46.3333	14.2222	13.1111	12.1111	36.2222	28.3333	17.4444	21.4778	4.00055	53.7778	57.6667	51.5556	39.1111	35.6667	51.3333	28.4444	31.7778	44.8889	33.3333	42.7556	3.29483	11.8889	41.3333	26.6667		35.6667	51.6667	32.2222	37.1111	29.6667	34.2222	33.3827	3.61245	40.8889	70.8889	38.4444		28.6667	23.2222	17	42.7778	48.6667	49.4444	40	5.3597
17	0	61	27.3333	4.77778	6.77778	15.7778	0	18.7778	27.7778	41	20.3222	6.20134	12.1111	50	0	14.3333	40.4444	52.2222	10.1111	40.8889	23.8889	20.8889	26.4889	5.75382	4.22222	16.2222	13.7778		0	7.55556	33.5556	13	12.3333	0	11.1852	3.43392	19.7778	10	17.1111		27.4444	37.8889	20.5556	1.55556	2.11111	26.8889	18.1481	4.01549
18	41.8889	12.6667	6.66667	0	16.2222	26.3333	19.1111	32.1111	30.1111	20.5556	20.5667	3.96073	57.5556	21.1111	38.2222	20	32.3333	36.1111	65.6667	39.3333	32.3333	57.6667	40.0333	4.91274	0	41.6667	14.4444		31	33.1111	4.11111	0	3.44444	38.1111	18.4321	5.80426	16	37.4444	24.7778		24.3333	41.2222	16.1111	0	26	25.2222	23.4568	4.05371
19	34.7778	61.2222	42.8889	25.6667	62.5556	61.3333	10.3333	54.4444	42.4444	48.7778	44.4444	5.4053	41.8889	0.888889	21.3333	11.8889	39.3333	58.4444	7.88889	39.4444	69.3333	15.1111	30.5556	7.17397	12.3333	0.222222	31.5556		4.55556	5.66667	0	0	0.222222	0	6.06173	3.47636	35.3333	11.7778	29.5556		16.1111	0.555556	0	0	0	10.5556	11.5432	4.4609
20	32.1111	16.4444	38.7778	7.55556	39.3333	62.1111	35.3333	38	42.2222	27.5556	33.9444	4.68978	22.7778	60.8889	60.3333	33.2222	56.6667	55.6667	48.3333	53.1111	36.2222	56.5556	48.3778	4.14111	6.22222	57.1111	17.6667		0	21.6667	0	51.5556	0	40.1111	21.5926	7.59447	20.4444	43.6667	23.5556		0	27.3333	29.2222	13.4444	20.8889	38.5556	24.1235	4.32503
21	65	61.7778	56.4444	36.2222	40.7778	49.5556	28.2222	41.4444	13.7778	31.8889	42.5111	5.06296	39.2222	57.5556	50.7778	8.22222	53.1111	62.7778	38.3333	51.2222	69.8889	24.4444	45.5556	5.85084	0	46.5556	33.5556		21.3333	20.7778	40	21.2222	44.6667	26	28.2346	4.89756	2.88889	53.4444	43.7778		28.2222	20.4444	29.1111	42.4444	14	42	30.7037	5.42646
22	53.1111	51.1111	36	29.8889	54.4444	64.7778	46.5556	32	57.5556	48.1111	47.3556	3.61493	49.5556	56	34.5556	51.2222	54.3333	65.4444	74.1111	33.1111	30.2222	47.3333	49.5889	4.46803	0	63.3333	23.1111		26.3333	25.7778	0	51	17.4444	41	27.5556	7.12556	15.2222	69	41		13.2222	33.2222	37.1111	32	40.3333	23.2222	33.8148	5.56348
23	24.6667	35.7778	25.1111	26.8889	12.2222	26.7778	11.8889	62.1111	25.7778	29.4444	28.0667	4.42434	37	35	13.5556	13.4444	33	0	13.5556	53.4444	46.5556	24.1111	26.9667	5.33783	24.2222	29.6667	13.6667			25.2222	19.3333	29.3333	7.22222	30.4444	22.3889	2.96682	0.444444	63.8889	13.4444			37.5556	18.4444	0	6.66667	40.1111	22.5694	8.00855
24	20.3333	25.5556	0	19.8889	18.4444	0	24	55.5556	26.6667	0	19.0444	5.32178	22.2222	0	0	8.88889	11.6667	52.3333	20.7778	10.5556	0	33.7778	16.0222	5.33821	5	59.3333	12			4.66667	23.8889	0	24.8889	42.7778	21.5694	7.33067	14.4444	15.7778	12.7778			15.5556	24.2222	0	0	26.5556	13.6667	3.43438
REMS	REMS												REMS												REMS												REMS
Hr
1	13.2222	12.7778	8.22222	2.77778	5.77778	2.44444	0	1.55556	3.33333	1	5.11111	1.51318	0	0	0	0	0	0	0	0	0	0	0	0	19.1111	9	7.77778	4.66667	1.44444	2.22222	10.5556	0	2.77778	5.44444	6.3	1.78702	0.444444	0	0	0	0	0	0	0	0	0	0.0444444	0.0444444
2	9.66667	2.33333	10	6.11111	12.8889	10.5556	16.1111	11.3333	9.55556	10.8889	9.94444	1.16784	0	0	0	0	0	0	0	0	0	0	0	0	0.222222	13.7778	3	13.8889	3.88889	12.5556	1.66667	5.55556	9.22222	7.66667	7.14444	1.6041	0	0	0	0	0	0	0	0	0	0	0	0
3	7.33333	6.33333	2.44444	7	4.44444	9.55556	4.44444	7.66667	10.2222	8.88889	6.83333	0.781868	0	0	0	0	0	0	0	0	0	0	0	0	5.33333	10.3333	8.66667	14.5556	9.77778	5.55556	7.77778	6.55556	15	9.11111	9.26667	1.06164	0	0	0	0	0	0	0	0	0	0	0	0
4	9.77778	5.66667	7.22222	12.6667	14.6667	7.77778	14.2222	11.1111	10.8889	6.77778	10.0778	1.00302	0	0	0	0	0	0	0	0	0	0	0	0	6.55556	15.6667	11.4444	9.44444	9.44444	12.6667	9.88889	6.33333	6.11111	8.88889	9.64444	0.956503	0	0	0	0	0	0	0	0	0	0	0	0
5	14.7778	10.6667	18.6667	14.1111	7.55556	6.77778	14.2222	10.4444	7.33333	7.11111	11.1667	1.29749	0	0	0	0	0	0	0	0	0	0	0	0	4.66667	8.22222	9.66667	15	13.2222	4.44444	12.7778	5	8.88889	12.2222	9.41111	1.21739	0	0	0	0	0	0	0	0	0	0	0	0
6	8.22222	12.1111	5	9	7		9.55556	9.66667	4.55556	0	7.23457	1.20034	10.6667	15.4444	13.1111	9.55556	6.77778	4.11111	2.88889	7	8.22222	4.33333	8.21111	1.28177	15.3333	16.4444	10.1111	11.3333	25.8889	13.6667	10.2222	15	10.4444	12.8889	14.1333	1.49226	2.66667	3.44444	14.7778	5.11111	16.2222	14.4444	12.5556	2.88889	2.11111	9.33333	8.35556	1.8095
7	12.4444	9.22222	11.8889	16	4.22222	14	10	7.44444	12.1111	10.8889	10.8222	1.05698	15.2222	17.6667	13.2222	9.66667	9	9.33333	5	12.3333	9.77778	10	11.1222	1.13474	13.4444	13.1111	15.6667	10.3333	6.44444	11.5556	13.5556	8.77778	16.7778	15.4444	12.5111	1.03003	9.33333	3.66667	6.55556	11.6667	7.88889	11	2.66667	6.22222	4.33333	17.5556	8.08889	1.41962
8	8.44444	9	9.77778	8.77778	12.7778	13.2222	10	8.11111	10.6667	7.44444	9.82222	0.608175	5.77778	10.6667	11.8889	9.11111	11	10.5556	13.8889	9.11111	14.1111	9.66667	10.5778	0.771189	13.6667	11.1111	9.77778	11.2222	14.5556	4.88889	8	13.6667	1.88889	7.66667	9.64444	1.2932	8.77778	14.3333	13.4444	10.8889	12.4444	12.4444	10.8889	11.4444	9.55556	5.11111	10.9333	0.837594
9	14.8889	9.55556	15.1111	9.77778	11.1111	8.44444	7.22222	11.5556	4.44444	5.55556	9.76667	1.12613	14.5556	15.6667	9.55556	15.1111	11	10.1111	10.3333	5.88889	12.1111	11.2222	11.5556	0.936678	2.44444	8.77778	12.5556	17.2222	20.6667	10.8889	14.3333	11.6667	9.55556	10.5556	11.8667	1.56012	7	7.55556	8.44444	9.11111	12.1111	8.66667	8.33333	15	10.1111	12.1111	9.84444	0.791796
10	16	7.77778	6.11111	7.66667	8.33333	14.6667	6.22222	4.22222	8.33333	5.88889	8.52222	1.20903	4.77778	6.55556	6.77778	3.66667	10	9.33333	9.44444	9.11111	5.33333	4.44444	6.94444	0.748707	18.5556	9.88889	13.4444	13.6667	7.44444	6.77778	8.66667	5	13.2222	12.4444	10.9111	1.29214	2.11111	9.77778	12.4444	6.77778	9.88889	10.8889	10.4444	3.11111	7.44444	10	8.28889	1.07678
11	12.7778	7.77778	8.11111	12.2222	13.3333	7.11111	7	9.88889	6.33333	4	8.85556	0.977392	8.66667	14.6667	7.11111	14.3333	6.77778	2.66667	8.55556	9.66667	14	7.22222	9.36667	1.23262	5.66667	9.22222	10.5556	10.3333	6.33333	10.6667	5.11111	14.3333	6.44444	9	8.76667	0.91166	12.8889	18	7.88889	19.6667	8.22222	6.33333	9.66667	13.5556	9.44444	6.77778	11.2444	1.47124
12	7.55556	10.2222	9.33333	4.33333	3.11111	9.33333	3.66667	3.66667	1.77778	3.55556	5.65556	0.983743	8.33333	8.66667	3.55556	11	7.77778	9.88889	7.11111	5.77778	5.22222	5.66667	7.3	0.721994	7.77778	4.22222	9.44444	6.44444	8.33333	6.44444	2	8.44444	5.88889	5.33333	6.43333	0.703791	6.88889	8.66667	10	9.88889	7.55556	5.55556	5.11111	9.22222	8.77778	8.55556	8.02222	0.539217
13	0	0	0	0	0	0	0	0	0	0	0	0	0	0	0	0.666667	0	2.44444	1.88889	0.777778	1.55556	0	0.733333	0.291253	0	0	0		0	0	0	0	0	0	0	0	0	0	1.11111		0	0	1.55556	0	3	4.77778	1.16049	0.56961
14	0	0	0	2.11111	1.33333	0.222222	0	0.222222	0	0	0.388889	0.231444	0	1.44444	6.77778	2.44444	2.11111	3.44444	0	1.44444	1.33333	0.888889	1.98889	0.627327	0	0	2.22222		0	0	0.777778	3	0.888889	0.444444	0.814815	0.364302	2.88889	1	3.77778		2.88889	1.88889	4.66667	5.66667	10.4444	3	4.02469	0.925885
15	0	0	1.66667	0	0	1.44444	0	1.55556	0.666667	0	0.533333	0.232951	0.333333	1.66667	1	0.777778	0	3.33333	6.33333	2.88889	2.88889	5.11111	2.43333	0.660974	2.22222	1.77778	1.33333		2.33333	0	3.22222	1.88889	0	2	1.64198	0.353688	4.77778	1.55556	2.44444		5.88889	4.88889	4.88889	6.11111	4.33333	2.33333	4.1358	0.544261
16	0	4.66667	0.666667	10.8889	0	0	0	1.66667	2.22222	1.66667	2.17778	1.07423	7.77778	5.55556	3.22222	6.66667	3.44444	6.66667	3.11111	5.66667	5.88889	4.88889	5.28889	0.507069	0	2.77778	0		1.22222	4.77778	2.11111	4.77778	1.66667	0	1.92593	0.631533	5.11111	8.55556	1.66667		0	3.44444	1.22222	5.33333	9.33333	2.22222	4.09877	1.08495
17	0	0	0	0	0	1.11111	0	0.333333	1.66667	1.77778	0.488889	0.233186	0	2.22222	0	0.666667	4.44444	7.55556	2.66667	1.33333	0.777778	0	1.96667	0.767668	0	0	0		0	0	2.44444	1.88889	0	0	0.481481	0.321818	0.555556	0	3.11111		1	4.11111	3.77778	1.66667	0	0	1.58025	0.558565
18	1.55556	0	0	0	1.33333	0	0.333333	2	1.11111	0	0.633333	0.247927	5.22222	2.77778	1.66667	3.44444	4	2.77778	9.33333	8.55556	3.55556	3.88889	4.52222	0.795228	0	1	0		0.333333	0	0	0	0	0	0.148148	0.112644	0	2.22222	0		1	1.33333	0	0	0.666667	1.55556	0.753086	0.275782
19	0.555556	0.777778	2.66667	2.22222	7.88889	4.22222	0	1.66667	1.11111	1.88889	2.3	0.728049	5.55556	0	3	2.55556	0	8.11111	0	5.66667	10.3333	1.66667	3.68889	1.14393	1.44444	0	0		0	0	0	0	0	0	0.160494	0.160494	3.55556	0	1.88889		1	0	0	0	0	0	0.716049	0.418253
20	0.555556	0.444444	2	0	2.77778	9.22222	4.88889	3.11111	1.22222	2	2.62222	0.866572	1.88889	1.88889	5.11111	1	13.1111	6.55556	7.55556	9.22222	1.44444	5.22222	5.3	1.24601	0	0.333333	3.44444		0	0	0	1.33333	0	1.77778	0.765432	0.402088	1.22222	5.55556	1.88889		0	4.88889	5.55556	2.33333	0.666667	0.555556	2.51852	0.743513
21	2	1.44444	7.33333	3.66667	0.111111	6.33333	0.666667	2.55556	1.44444	2.44444	2.8	0.745871	2.77778	6.55556	7	0	6.55556	12.3333	6.44444	6	8.77778	2.66667	5.91111	1.09065	0	3.88889	0		0	0	4.11111	1.55556	0	0	1.06173	0.580936	0	11.4444	1.44444		0.888889	1.55556	4.88889	2.55556	0	0	2.53086	1.23072
22	0.444444	1.44444	2.22222	0	4.88889	9.77778	8.33333	3.22222	5.44444	3.22222	3.9	1.02459	1.55556	8.22222	2	2.88889	7.55556	7.44444	12	0.777778	1.55556	6.33333	5.03333	1.19568	0	3.88889	2.44444		0.555556	0.444444	0	9.55556	0	0	1.87654	1.06211	0	8.22222	10.2222		0.555556	1.55556	1.44444	1.77778	2	2.11111	3.09877	1.19088
23	0	1.55556	0.888889	4.33333	0	6.22222	2.44444	7.66667	1.33333	1.33333	2.57778	0.833753	1	3.22222	1.33333	3.55556	1.55556	0	7.88889	7.77778	2.88889	1.11111	3.03333	0.872543	3.44444	3.66667	0			1.11111	2.55556	0.888889	0	0	1.45833	0.548542	0	7.55556	0			6.44444	1.22222	0	0	1.66667	2.11111	1.09573
24	1	1.33333	0	3.33333	2.33333	0	0.888889	3.44444	1.11111	0	1.34444	0.410243	0	0	0	0.666667	0	0.555556	0.666667	0	0	2.77778	0.466667	0.273573	0	1.88889	0			0	3.77778	0	0.333333	0	0.75	0.490091	0.333333	4.22222	0.888889			0.888889	2.22222	0	0	0.666667	1.15278	0.504799

## Sheet: Figure 3-fig sup2 (#)
	WT Baseline										WT 5 h Sleep Deprivation										Shank3 Baseline										Shank3 5 h Sleep Deprivation														WT DIFFERENCE SCORES
Hr / Animal	1	2	3	4	5	6	7	8	9	10	1	2	3	4	5	6	7	8	9	10	11	12	13	14	15	16	17	18	19	20	11	12	13	14	15	16	17	18	19	20				Hr	1	2	3	4	5
WAKE	WAKE										WAKE										WAKE										WAKE													WAKE	WAKE
1	3	1	3	1	2	5	1	1	2	2	1	1	1	1	1	1	1	1	1	1	8	3	3	4	2	2	3	1	1	4	1	1	1	1	1	3	1	1	1	2				1	-2	0	-2	0	-1
2	2	1	2	3	3	3	2	4	2	2	1	1	2	7	1	1	1	1	1	1	1	1	4	5	7	0	1	2	3	4	1	8	1	6	2	3	7	1	1	3				2	-1	0	0	4	-2
3	6	3	3	6	3	4	4	4	1	2	2	2	3	2	2	1	1	1	3	2	5	2	5	4	3	3	2	4	1	5	1	2	1	14	4	5	4	1	1	3				3	-4	-1	0	-4	-1
4	3	3	3	2	4	3	4	3	3	2	1	1	5	2	8	1	1	1	1	1	7	2	6	7	2	3	2	2	1	2	1	1	2	8	6	4	3	2	1	5				4	-2	-2	2	0	4
5	2	2	4	1	4	6	2	4	2	6	4	3	6	2	6	1	1	2	1	1	2	3	5	0	1	1	2	4	1	2	1	3	2	10	6	8	1	1	2	2				5	2	1	2	1	2
6	3	2	6	3	4		3	4	3	2	6	1	5	3	5	5	3	5	3	2	6	3	7	1	1	2	3	2	1	2	2	2	1	3	2	3	1	3	2	1				6	3	-1	-1	0	1
7	4	3	2	5	2	4	1	4	3	2	5	4	2	1	2	2	2	4	3	1	5	3	4	2	2	3	2	4	0	1	3	1	2	2	1	3	1	4	2	1				7	1	1	0	-4	0
8	2	3	2	2	3	3	1	3	1	3	2	2	4	2	1	2	2	2	4	3	2	3	3	3	2	3	1	3	1	3	2	0	2	3	2	2	1	3	1	2				8	0	-1	2	0	-2
9	4	4	2	3	3	3	0	4	4	4	2	6	3	2	3	1	4	3	3	3	4	2	3	4	1	1	1	4	2	2	2	2	2	6	2	2	2	3	2	2				9	-2	2	1	-1	0
10	4	2	1	6	4	4	1	5	4	6	2	3	3	1	5	3	3	4	1	4	5	1	2	3	1	3	3	2	0	2	2	2	5	2	3	1	1	3	3	1				10	-2	1	2	-5	1
11	3	5	2	4	3	3	1	4	3	3	2	3	2	1	3	4	3	3	3	6	7	4	4	1	4	3	3	3	2	3	3	2	3	3	2	2	3	4	3	2				11	-1	-2	0	-3	0
12	9	5	9	8	4	4	4	6	7	4	2	4	3	4	6	3	4	3	7	7	4	4	3	3	6	2	2	4	3	2	3	4	3	1	3	2	1	3	3	2				12	-7	-1	-6	-4	2
13	2	1	2	1	3	1	1	2	2	1	1	1	4	2	4	1	4	3	3	2	1	2	3		1	1	1	1	1	1	1	1	3		3	3	2	3	3	6				13	-1	0	2	1	1
14	5	4	3	2	7	5	1	4	4	3	4	3	3	2	7	3	2	4	7	5	1	1	4		5	2	2	4	2	5	2	3	2		3	3	4	5	3	5				14	-1	-1	0	0	0
15	1	5	2	2	6	4	1	4	3	2	2	5	4	3	6	4	4	6	4	8	3	2	3		3	4	2	2	3	5	4	2	5		7	7	6	7	6	5				15	1	0	2	1	0
16	3	5	1	3	3	2	2	5	5	3	4	3	4	5	5	6	5	4	3	4	2	3	9		10	4	4	4	5	7	6	3	7		6	2	4	5	5	6				16	1	-2	3	2	2
17	1	6	4	1	1	3	1	3	3	4	2	5	1	2	6	5	2	4	2	2	1	2	4		1	1	4	2	3	1	3	3	4		5	5	4	1	2	4				17	1	-1	-3	1	5
18	3	1	2	1	2	3	2	3	2	3	4	4	2	3	6	3	4	3	3	5	1	4	4		6	5	1	1	1	7	3	2	5		7	3	3	1	3	3				18	1	3	0	2	4
19	4	5	5	2	5	4	1	8	6	4	3	2	1	1	4	7	1	5	4	2	3	1	9		3	2	1	1	1	1	6	1	6		8	1	1	1	1	2				19	-1	-3	-4	-1	-1
20	3	3	3	2	4	5	1	3	6	2	6	3	3	5	6	5	4	3	3	3	2	3	6		1	5	1	6	1	4	5	2	9		1	5	4	1	2	5				20	3	0	0	3	2
21	2	7	4	5	3	4	2	11	3	3	5	5	1	2	4	4	2	4	3	2	1	3	10		3	3	3	3	5	4	3	3	11		6	4	3	5	1	7				21	3	-2	-3	-3	1
22	4	5	2	3	5	3	2	5	5	3	3	3	1	9	4	3	4	4	3	3	1	3	10		4	7	1	7	3	3	2	3	6		3	8	2	5	3	4				22	-1	-2	-1	6	-1
23	2	6	2	6	1	3	2	5	5	5	3	2	2	2	2	1	1	7	6	3	3	2	7			6	2	3	2	4	1	2	4		6	8	2	1	2	6				23	1	-4	0	-4	1
24	3	3	1	2	2	1	2	8	3	1	2	1	1	2	1	3	2	2	1	3	1	1	4			2	3	1	7	5	3	2	3		3	2	4	1	1	4				24	-1	-2	0	0	-1
NREMS	NREMS										NREMS										NREMS										NREMS													NREMS	NREMS
Hr																																												Hr
1	7	15	9	3	6	6	1	2	3	2	0	0	0	0	0	0	0	0	0	0	12	14	9	5	5	4	10	0	3	3	1	0	0	0	0	0	0	0	0	1				1	-7	-15	-9	-3	-6
2	11	3	10	5	7	9	9	6	8	10	0	0	0	2	0	0	0	0	0	0	3	9	4	8	9	10	5	5	7	5	0	2	0	0	0	0	0	0	0	1				2	-11	-3	-10	-3	-7
3	12	6	5	9	8	11	8	8	6	5	0	1	2	1	1	0	0	0	2	0	8	12	12	10	9	10	6	9	9	8	0	1	0	2	1	3	0	0	0	3				3	-12	-5	-3	-8	-7
4	10	5	9	7	8	10	9	7	7	8	0	0	1	0	4	0	0	0	0	0	7	15	7	9	6	7	5	5	4	5	0	0	0	2	7	2	1	0	0	2				4	-10	-5	-8	-7	-4
5	13	11	11	10	7	12	7	8	7	9	0	0	5	1	2	0	0	0	0	0	2	8	11	8	5	3	8	8	5	5	0	0	0	5	3	5	0	0	0	0				5	-13	-11	-6	-9	-5
6	9	8	9	9	10		7	7	5	2	7	7	9	6	7	5	4	5	7	5	12	6	8	8	9	7	8	6	8	8	4	3	6	5	8	6	5	2	2	5				6	-2	-1	0	-3	-3
7	8	8	14	13	5	9	9	4	9	12	10	10	10	2	7	7	6	8	8	5	13	8	12	7	5	9	10	4	6	5	7	7	6	4	6	9	3	7	5	6				7	2	2	-4	-11	2
8	9	7	7	7	11	10	3	8	5	5	5	6	7	8	6	14	7	8	11	8	11	12	5	9	7	4	4	8	4	7	3	8	11	5	4	7	9	7	4	2				8	-4	-1	0	1	-5
9	13	7	11	10	8	15	9	6	7	8	8	9	10	5	7	6	7	7	6	6	4	15	8	8	11	8	8	10	10	6	4	6	4	9	5	4	6	7	5	7				9	-5	2	-1	-5	-1
10	8	10	8	10	8	12	6	8	4	7	8	6	6	3	11	8	5	9	5	4	10	13	5	7	4	7	8	4	9	7	2	8	12	5	6	9	5	3	6	5				10	0	-4	-2	-7	3
11	15	10	10	11	9	11	6	7	4	6	9	6	6	10	4	6	6	8	4	9	8	14	12	9	11	6	4	9	6	6	8	5	6	9	5	7	7	8	7	7				11	-6	-4	-4	-1	-5
12	12	11	12	11	5	11	7	7	7	5	14	9	7	8	7	6	6	7	7	8	9	8	7	10	11	7	7	5	5	3	5	7	4	4	6	5	6	11	8	4				12	2	-2	-5	-3	2
13	2	0	1	0	2	1	1	4	1	0	0	0	4	3	4	2	3	2	2	2	0	2	1		1	1	1	0	1	0	0	0	5		3	7	2	3	2	6				13	-2	0	3	3	2
14	3	4	3	2	6	8	0	2	3	2	2	5	4	2	6	5	2	6	7	7	0	0	5		7	2	4	7	1	6	3	4	4		4	5	4	8	5	7				14	-1	1	1	0	0
15	0	10	2	1	10	3	0	7	3	2	4	8	4	4	7	6	4	11	4	13	3	4	4		3	7	4	1	3	6	4	3	8		10	8	9	9	7	5				15	4	-2	2	3	-3
16	2	6	2	6	3	4	1	4	4	3	6	8	6	8	6	10	4	8	4	4	2	3	10		11	13	6	4	5	11	6	6	10		6	2	5	8	6	7				16	4	2	4	2	3
17	0	7	4	1	1	4	0	3	4	4	2	8	0	1	6	8	1	7	2	2	1	3	3		0	1	5	2	4	0	4	2	4		6	8	3	1	0	4				17	2	1	-4	0	5
18	4	2	1	0	4	2	1	5	5	4	10	7	7	4	7	3	7	9	6	9	0	3	5		9	6	1	0	2	7	4	3	8		8	9	2	0	2	2				18	6	5	6	4	3
19	5	12	8	4	9	6	1	15	10	8	5	1	4	1	7	15	2	9	7	1	4	0	10		1	1	0	0	0	0	6	1	10		7	0	0	0	0	2				19	0	-11	-4	-3	-2
20	5	5	5	2	5	12	4	9	9	2	9	6	9	6	10	11	10	7	4	8	1	5	7		0	7	0	9	0	4	5	7	10		0	9	4	2	4	5				20	4	1	4	4	5
21	6	12	5	8	4	8	5	11	3	6	8	6	7	2	8	11	5	8	12	4	0	6	11		4	4	4	6	10	6	1	8	16		9	7	3	4	2	9				21	2	-6	2	-6	4
22	8	11	3	6	8	12	7	8	10	8	12	6	6	11	7	10	11	6	5	5	0	8	8		8	6	0	9	5	7	3	6	12		3	9	4	4	7	6				22	4	-5	3	5	-1
23	5	8	1	7	1	6	2	10	6	3	7	4	1	3	2	0	2	11	8	3	3	3	4			10	3	6	5	4	0	7	5		11	10	3	0	2	7				23	2	-4	0	-4	1
24	2	3	0	2	3	0	2	14	3	0	3	0	0	2	1	4	3	2	0	4	1	8	5			2	3	0	8	5	2	3	3		4	3	6	0	0	6				24	1	-3	0	0	-2
REMS	REMS										REMS										REMS										REMS													REMS	REMS
Hr																																												Hr
1	6	9	5	1	4	1	0	1	1	1	0	0	0	0	0	0	0	0	0	0	8	5	5	2	1	1	5	0	2	2	1	0	0	0	0	0	0	0	0	0				1	-6	-9	-5	-1	-4
2	6	1	6	2	4	5	7	6	3	9	0	0	0	0	0	0	0	0	0	0	0	8	1	4	4	6	2	3	4	3	0	0	0	0	0	0	0	0	0	0				2	-6	-1	-6	-2	-4
3	6	3	1	4	3	6	4	3	5	2	0	0	0	0	0	0	0	0	0	0	3	6	5	6	5	4	4	7	7	3	0	0	0	0	0	3	0	0	0	0				3	-6	-3	-1	-4	-3
4	6	2	4	7	6	6	7	5	4	5	0	0	0	0	0	0	0	0	0	0	4	8	7	4	5	4	3	3	3	4	0	0	0	0	0	2	0	0	0	0				4	-6	-2	-4	-7	-6
5	10	7	6	6	3	5	6	5	4	2	0	0	0	0	0	0	0	0	0	0	1	4	8	6	5	2	6	1	3	4	0	0	0	0	0	5	0	0	0	0				5	-10	-7	-6	-6	-3
6	7	5	3	3	4		2	5	3	0	4	6	6	4	3	2	1	2	5	3	6	6	4	6	12	7	6	5	4	4	1	1	6	2	8	6	4	1	1	5				6	-3	1	3	1	-1
7	10	5	4	9	1	7	6	2	8	6	9	7	7	2	6	6	4	6	5	4	5	7	11	4	3	7	6	2	5	4	4	3	4	3	4	9	2	5	2	6				7	-1	2	3	-7	5
8	6	5	4	4	6	8	4	5	3	3	3	6	7	5	5	9	7	6	7	6	5	6	4	5	7	1	2	8	2	4	2	4	9	4	3	7	7	6	6	3				8	-3	1	3	1	-1
9	10	3	7	5	6	8	4	7	2	5	6	5	7	5	5	4	4	3	4	5	1	9	7	5	8	6	4	7	6	4	3	2	3	6	5	4	5	8	4	6				9	-4	2	0	0	-1
10	8	5	5	3	4	8	2	2	4	4	5	4	4	3	6	5	3	5	3	1	8	8	6	4	2	4	3	2	6	4	1	6	8	4	3	9	4	1	2	4				10	-3	-1	-1	0	2
11	8	5	5	3	7	4	4	5	2	2	5	4	3	7	4	2	4	6	4	3	3	3	5	3	5	4	4	7	3	3	6	5	5	7	4	7	5	6	4	3				11	-3	-1	-2	4	-3
12	3	5	4	4	2	5	2	2	1	3	6	4	3	4	3	4	4	4	2	3	2	3	6	2	3	3	2	7	3	1	4	3	4	4	6	5	2	5	4	3				12	3	-1	-1	0	1
13	0	0	0	0	0	0	0	0	0	0	0	0	0	1	0	1	1	1	1	0	0	0	0		0	0	0	0	0	0	0	0	1		0	7	2	0	2	1				13	0	0	0	1	0
14	0	0	0	2	1	0	0	0	0	0	0	2	2	1	1	2	0	2	2	1	0	0	1		0	0	1	1	1	1	1	1	1		1	5	2	4	4	2				14	0	2	2	-1	0
15	0	0	1	0	0	1	0	1	1	0	0	2	1	1	0	2	3	3	2	5	1	1	1		1	0	2	1	0	1	3	1	2		2	8	2	4	2	3				15	0	2	0	1	0
16	0	1	1	3	0	0	0	2	1	1	3	5	3	3	2	3	3	5	4	2	0	1	0		2	3	1	2	2	0	4	4	2		0	2	1	2	4	2				16	3	4	2	0	2
17	0	0	0	0	0	1	0	0	1	1	0	2	0	1	2	3	1	1	1	0	0	0	0		0	0	1	1	0	0	1	0	1		1	8	2	1	0	0				17	0	2	0	1	2
18	1	0	0	0	1	0	0	1	1	0	6	1	3	2	3	1	3	5	2	4	0	1	0		0	0	0	0	0	0	0	2	0		1	9	0	0	1	1				18	5	1	3	2	2
19	1	1	2	1	3	1	0	2	1	2	3	0	3	1	0	5	0	3	4	1	1	0	0		0	0	0	0	0	0	2	0	1		1	0	0	0	0	0				19	2	-1	1	0	-3
20	1	1	2	0	1	5	3	3	1	3	3	2	4	1	4	5	4	3	1	3	0	0	1		0	0	0	2	0	1	2	4	1		0	9	2	1	1	1				20	2	1	2	1	3
21	2	1	3	1	0	2	1	2	1	3	2	4	4	0	3	6	3	4	4	2	0	3	0		0	0	2	1	0	0	0	7	2		1	7	2	2	0	0				21	0	3	1	-1	3
22	1	2	2	0	2	7	7	4	5	2	1	4	1	3	4	5	6	2	2	2	0	4	1		1	1	0	4	0	0	0	3	4		1	9	2	2	2	2				22	0	2	-1	3	2
23	0	1	1	2	0	4	2	4	1	2	2	1	1	2	1	0	2	5	3	1	2	3	0			1	1	1	0	0	0	3	0		0	10	1	0	0	1				23	2	0	0	0	1
24	1	1	0	2	2	0	1	3	1	0	0	0	0	1	0	1	1	0	0	4	0	3	0			0	1	0	0	0	0	3	1		1	3	1	0	0	1				24	-1	-1	0	-1	-2
[truncated: 15 more columns]

## Sheet: Figure 3-fig sup2 (m)
MINUTES	WT Baseline										WT 5 h Sleep Deprivation										Shank3 Baseline										Shank3 5 h Sleep Deprivation														WT DIFFERENCE SCORES
Hr / Animal	1	2	3	4	5	6	7	8	9	10	1	2	3	4	5	6	7	8	9	10	11	12	13	14	15	16	17	18	19	20	11	12	13	14	15	16	17	18	19	20				Hr	1	2	3	4	5
WAKE	WAKE										WAKE																																	WAKE	WAKE
1	6.23333	6.26667	3.75	48.4	12.7667	8.4	52.3333	39.8	17.2333	20.4667	60	60	60	60	60	60	60	60	60	60	1.08333	3.23333	8.2	8.28333	25.2	17.9	2.28333	60	41.2	8.26667	51.4667	59.3333	59.7333	60	54.4	19.9	60	60	60	29.6333				1	53.7667	53.7333	56.25	11.6	47.2333
2	10.9667	53.7333	6.16667	13.4167	2.33333	2.95	1.16667	4.95	7.86667	5.36667	60	60	29.4333	7.9	60	60	60	60	60	60	56.3333	23.9333	9.45	1.73333	5.2	0	39.3333	12.7333	8.46667	4.86667	60	6.95	60	9.31667	29.9667	19.6667	8.4	60	60	19.2833				2	49.0333	6.26667	23.2667	-5.51667	57.6667
3	4.1	7.3	14.9667	3.26667	6.56667	3.45	4.71667	3.41667	17.0667	9.43333	29.8333	29.6333	19.2167	29.7667	29.7667	60	60	60	19.5333	29.9333	6.86667	7.06667	5.45	0.7	8.86667	5.8	15.5333	4.43333	2.26667	4.61667	60	29.7333	60	3.75	14.6833	11.1833	14.8333	60	60	18.5333				3	25.7333	22.3333	4.25	26.5	23.2
4	6.55	9.08333	4.66667	9.9	2.63333	4.03333	4.03333	3.86667	3.01667	10	60	60	11.4667	29.9667	7.2	60	60	60	60	60	5.18333	1.03333	4.51667	2.76667	15.3	1.35	5.2	14.4	22.5333	5.23333	60	60	29.5667	6.95	8.71667	14.3	19.7667	29.8333	60	11.6667				4	53.45	50.9167	6.8	20.0667	4.56667
5	5.56667	5.06667	2.31667	11.8	3.46667	3.06667	1.66667	4.2	4.23333	2.1	14.9	19.9333	8.98333	29.7333	9.16667	60	60	29.9667	60	60	22.9667	7.93333	4.11667	0	6.8	29.2	0.466667	6.68333	25.4	5.3	60	19.8	29.8667	5.11667	9.36667	6.98333	60	60	29.6	29.9667				5	9.33333	14.8667	6.66667	17.9333	5.7
6	7.43333	6.2	3.05	6.43333	4.21667		6.03333	4.53333	7.26667	26.4667	3.63333	5.13333	2.4	4.86667	4.5	3.53333	11.1333	5.88333	4.5	6.93333	0.8	1.68333	3.8	14.0667	0.533333	0.766667	7.16667	0.733333	0.466667	0.9	20.6667	20.0333	19	10.75	3.1	6.36667	1.2	12.7333	22.5667	8.86667				6	-3.8	-1.06667	-0.65	-1.56667	0.283333
7	2.8	6.66667	1	0.866667	14.6667	2.38333	0.6	4.68333	3.66667	3.36667	1.33333	3.06667	2.5	31.5333	3.06667	5.33333	7.26667	2.38333	5	20	0.8	4.83333	3.1	4.53333	14.5	2.9	0.566667	7.83333	0	5.13333	8.56667	26.3333	14.2	8.76667	26.9333	1.43333	41.3333	6.11667	13.5333	4.06667				7	-1.46667	-3.6	1.5	30.6667	-11.6
8	14.5667	3.61667	12.0667	8.96667	0.7	4.41667	32.2667	5.36667	15.6667	10.7333	13.5	8.3	4.38333	1.96667	13.4	2.26667	2.63333	7.13333	1.01667	5.75	2.06667	3.88333	10.4167	6.4	6.83333	12.8333	27	0.816667	42.2	7.95	10.6	0	1.03333	0.95	0.633333	2.23333	0.533333	6.43333	19.2	18.1333				8	-1.06667	4.68333	-7.68333	-7	12.7
9	4.61667	5.13333	3.56667	4.13333	4.13333	5.26667	0	3.5	4.85	3.16667	3.53333	3.2	5.21667	10.3667	4.48333	14.2667	1.46667	7.41667	5.48333	5.33333	10.1333	8.16667	5.75	0.95	0.466667	0.533333	2.2	1.43333	2.43333	3.46667	8.83333	14.8	10.4333	0.75	8.56667	13.3	9.13333	0.9	4.13333	2.03333				9	-1.08333	-1.93333	1.65	6.23333	0.35
10	3.18333	6.03333	23.3333	3.86667	3.88333	1.38333	23.2667	5.61667	6.36667	2.56667	21.8667	4.76667	4.35	18.7333	2.1	5.76667	7.53333	2.73333	33.1333	6.66667	0.916667	16.3333	12.9333	1.01667	31.6667	5.68333	2.26667	14.9667	0	9.13333	23.8	2.7	0.733333	17.7667	3.86667	0.533333	11.7333	13.6	5.96667	6				10	18.6833	-1.26667	-18.9833	14.8667	-1.78333
11	5.13333	4.9	11.8667	3.08333	2.16667	6.28333	27	5.3	5.21667	11.9	7.6	4.75	8.3	10.1333	7.06667	7.31667	5.48333	6.68333	2.73333	3.83333	4.55	3.23333	2.63333	12.8667	2.25	3.23333	9.76667	2.66667	11.9667	3.5	0.533333	6.5	8.66667	1	4.3	13.8667	5.88333	2.31667	4.68333	9.16667				11	2.46667	-0.15	-3.56667	7.05	4.9
12	2.8	5.13333	3.05	2.46667	8.36667	5.85	5.63333	5.23333	5.06667	8.66667	3.1	3.93333	9.15	3.16667	3.96667	6.35	6.73333	8.73333	3.65	4.38333	8.11667	8.31667	9.55	8.28333	4.53333	14.3	16.0667	7	11.35	12.6333	6.13333	3.16667	6.26667	20.4667	5.96667	7.03333	20.4	6.2	5.81667	8.06667				12	0.3	-1.2	6.1	0.7	-4.4
13	28.9333	60	29.6333	60	17.6833	59.8667	59.9333	24.2333	27.5	60	60	59.4	12.8167	23.9	12.7333	53.8	11.7167	16.7	17.8	26.0667	60	23	18		57.3333	53.4667	58.4667	60	59.9333	60	60	60	15.2167		16.1333	14.4167	26.7667	15.4833	16.1333	6.3				13	31.0667	-0.6	-16.8167	-36.1	-4.95
14	8.06667	10.45	15.6667	22.7333	4.93333	7.05	60	13.3833	11.4	17.1333	12.4667	9	12.5667	24.4	5.33333	10.1	25.1333	9.41667	4.75	7.6	60	60	9.58333		8.08333	22.3667	20.3333	10.3333	24.3	5.8	24.0333	10.7	19.6333		16.2167	15	7.38333	5.4	10.4833	5.98333				14	4.4	-1.45	-3.1	1.66667	0.4
15	60	6.61667	22	27.8667	6.66667	11.45	60	9.9	13.9333	25.6	21.5667	6.53333	9.73333	14.5	7.68333	8.2	8.56667	3.85	8.81667	2.86667	18.2	15.6667	16.15		15.6	9.48333	16.7333	27.5333	15.6667	6.53333	10.4	22.6	7		4.21667	3.63333	5.11667	3.95	6.33333	8.83333				15	-38.4333	-0.0833333	-12.2667	-13.3667	1.01667
16	17.3667	8.05	55.4667	7.96667	16.9	25.9	26.5333	7.43333	8.5	16.4833	5.2	6.4	6.51667	6.28333	7	3.73333	8.13333	8.86667	9.46667	9.05	26.0667	10.8833	4.75		3.58333	5.56667	9.58333	8.53333	7.5	5.48333	5.21667	3.06667	4.68333		7.13333	21.9333	12.3833	6	4.85	4.66667				16	-12.1667	-1.65	-48.95	-1.68333	-9.9
17	60	3.56667	10.9333	57.1333	56	16.5	60	16.0833	13.6167	8.31667	26.4667	5.45	60	25.1333	5.26667	4.4	26.2	8.26667	22.6	24	57.4	24.8667	12.8167		60	55.4	9.46667	25.2667	17.2	60	15.1667	18.0333	11.8167		8.6	6.46667	11.2	58	29.7333	10.85				17	-33.5333	1.88333	49.0667	-32	-50.7333
18	11.4	51.5333	28	60	24.4	14.7	23.9333	12.7333	20.0667	15.7667	4.9	11.0333	17.4667	14.8	6.16667	11.8	3.01667	9.4	12.2833	4.3	60	8.43333	12.6833		6.5	7.66667	57.2667	60	57.2667	5.03333	16.6667	17.1	8.53333		6.41667	10.2167	16.6	60	14.4167	14.5				18	-6.5	-40.5	-10.5333	-45.2	-18.2333
19	9.41667	3.75	6.2	21.1	3.13333	4.85	54.4	2.63333	5.16667	6.96667	10.0167	29.7333	44.5333	50.8667	8.28333	2.13333	54.6667	5.95	2.6	25.0333	16.7667	60	4.21667		19.3	28.1333	60	60	60	60	5.98333	53.2667	6.56667		6.25	60	60	60	60	26.5				19	0.6	25.9833	38.3333	29.7667	5.15
20	13.3	16.2833	11.2167	27.6667	8.05	2.95	33.9333	10.3333	5.43333	21.0667	7.46667	6.8	6	7.6	2.66667	3.73333	6.1	6.96667	12.3333	6.5	28.0333	7.73333	8		60	9.05	60	4.36667	60	8.51667	9.33333	14	4.76667		60	7.66667	9.75	49.8	22.6667	7.26667				20	-5.83333	-9.48333	-5.21667	-20.0667	-5.38333
21	8.96667	2.75	5.16667	6.93333	11.2667	5.93333	20.5667	2.93333	16.8333	12.8167	6.6	4.06667	23.0667	27.5	5.4	3.11667	15.4	5.61667	2.61667	21.3333	60	9.7	3.8		15.1667	15.3333	10.6667	14.9	5.71667	10.3833	19.5667	6.16667	2.73333		6.76667	11.3333	13.1	6.51667	50.6667	4.75				21	-2.36667	1.31667	17.9	20.5667	-5.86667
22	6.18333	4.61667	17.9667	13.5	4.4	3.83333	11.9667	7.53333	3.63333	8.4	8.23333	6.6	36.9333	2.76667	5.41667	4.13333	0.95	9.51667	13.6	8.7	60	5.41667	4.28333		10.4833	6.08333	60	3.08333	16.3	10.8	25.0667	3.61667	4.2		16.8	4.85	17.2667	7.6	10.15	10.7333				22	2.05	1.98333	18.9667	-10.7333	1.01667
23	21.8	6.01667	21.4667	6.83333	52.6	12.9333	25.7333	2.68333	8.6	8.2	11.0833	17.4	25.5	24.8333	19.0667	60	46.6667	3.03333	4.73333	14.8333	14.1667	18.9667	7.51667			6.86667	22.9667	13.2333	26.9667	10.1667	59.7333	7.3	12.5833		6.2	3.88333	23.9667	60	27.7667	5.48333				23	-10.7167	11.3833	4.03333	18	-33.5333
24	15.8	14	60	22.7	23.5667	60	22	2.55	14.0833	60	22.7333	60	60	26.7333	52.6667	9.1	23.0667	26.8	60	12.2333	56.8	19.8667	13.0833			28.8333	14.2333	60	6.15	6.41667	16.7333	23.7667	17.0667		16.8333	24.7333	10.8333	60	60	10.65				24	6.93333	46	0	4.03333	29.1
NREM	NREMS										NREMS										NREMS										NREMS													NREMS	NREMS
Hr																																												Hr
1	4.1	2.61667	4.53333	3.26667	5.03333	2.75	7.66667	9.4	7.8	9.13333	0	0	0	0	0	0	0	0	0	0	2.95	2.95	2.9	4.56667	1.43333	5.58333	4.26667	0	5.6	7.6	8.26667	0	0	0	0	0	0	0	0	0.2				1	-4.1	-2.61667	-4.53333	-3.26667	-5.03333
2	2.56667	1.4	3.83333	3.01667	6.41667	4.8	5.06667	5.48333	4.53333	4	0	0	0	1.63333	0	0	0	0	0	0	1.08333	2.36667	4.73333	5.08333	2.08333	4.86667	3.81667	5.9	4	6.7	0	0.633333	0	0	0	0	0	0	0	0.933333				2	-2.56667	-1.4	-3.83333	-1.38333	-6.41667
3	2.21667	5.46667	2.26667	3.73333	4.68333	3.48333	4.58333	5.03333	5.71667	7.08333	0	0.733333	0.9	0.466667	0.466667	0	0	0	0.7	0	2.73333	2.53333	2.01667	4.6	2.8	3.63333	3.73333	3.8	5.2	3.58333	0	0.533333	0	0.533333	0.866667	0.733333	0	0	0	0.816667				3	-2.21667	-4.73333	-1.36667	-3.26667	-4.21667
4	3.28333	5.86667	4.28333	3.35	4.91667	4.05	3.73333	5.78333	6	4.3	0	0	0.466667	0	0.5	0	0	0	0	0	2.71667	2.8	3.46667	3.68333	3.76667	6.68333	8.36667	5.25	7.98333	8.38333	0	0	0	0.5	0.966667	0.5	0.466667	0	0	0.7				4	-3.28333	-5.86667	-3.81667	-3.35	-4.41667
5	2.33333	3.7	3.01667	3.61667	5.8	2.95	6.53333	4.4	6.43333	4.75	0	0	1	0.533333	1.36667	0	0	0	0	0	5.26667	3.66667	2.8	5.95	8.76667	9.26667	5.83333	3.66667	5.53333	8.33333	0	0	0	0.783333	0.733333	0.65	0	0	0	0				5	-2.33333	-3.7	-2.01667	-3.08333	-4.43333
6	3.31667	4.8	3.6	3.7	3.75		4.95	4.81667	6.5	3.53333	4.03333	6.25	4.2	6.33333	4.61667	7.76667	6.11667	5.15	5.76667	8.36667	3.7	7.23333	3.05	4.6	4.5	6.96667	3.88333	8.03333	6.31667	6.05	4.11667	5.56667	4.7	4.65	5.18333	4.96667	10.0333	10.1	6.8	8.66667				6	0.716667	1.45	0.6	2.63333	0.866667
7	4.66667	4.15	3.2	3.16667	5.58333	4.36667	5.71667	9.21667	4.31667	3.6	4.23333	3.61667	4.26667	11.4	6.76667	5.96667	6.7	5.28333	4.68333	6.68333	3.43333	4.28333	2.71667	6.21667	5.23333	4.6	4.83333	5.81667	8	8.63333	3.91667	4.25	4.41667	8.66667	4.6	5.15	5.61667	4.33333	6.05	7.13333				7	-0.433333	-0.533333	1.06667	8.23333	1.18333
8	2.53333	5.93333	3.71667	4.85	4.4	3.43333	6.88333	4.63333	6.98333	4.43333	5.68333	5.93333	4.66667	6.1	6.36667	3.26667	6.23333	4.78333	4.18333	4.4	3.9	2.65	4.46667	3.43333	5	4.6	6.95	6.03333	4.05	4.3	11.0667	5.76667	4.15	10.0333	12.65	6.48333	5.51667	4.66667	8.41667	10.1333				8	3.15	0	0.95	1.25	1.96667
9	2.35	4.61667	3.41667	3.96667	4.91667	2.15	5.8	6.13333	5.13333	5.38333	4.4	3.28333	3.5	5.7	5.55	6.46667	6.5	4.7	5.75	6.06667	4.5	1.88333	4.16667	5.26667	3.95	6.41667	5.76667	4.6	4.63333	7.55	9.43333	3.7	8.38333	5.26667	6.78333	6.96667	5.73333	6.7	9	6.55				9	2.05	-1.33333	0.0833333	1.73333	0.633333
10	4.2	4.03333	3.56667	2.93333	4.78333	3.55	5.23333	3.56667	6.93333	5.68333	4.01667	6.56667	7.01667	12.8	3.78333	4.41667	6.15	4.6	4.6	7.66667	4.11667	2.36667	4.45	6.63333	5.8	5.4	5.65	6.53333	5.58333	4.56667	5.5	5.93333	3.76667	3.7	6.9	5.68333	8.16667	5.76667	6.16667	9.2				10	-0.183333	2.53333	3.45	9.86667	-1
11	2.1	2.73333	2.35	3.33333	4.86667	3.13333	4.55	4.48333	10	3.28333	3.36667	6	6.06667	3.78333	8.3	4.7	6.25	3.85	10.55	3.55	2.75	2.65	3.15	4.26667	4.03333	6.98333	6.38333	4.6	5.18333	7.15	6.11667	7.08333	4.66667	4.85	9.06667	3.81667	4.93333	5.11667	5.55	5.2				11	1.26667	3.26667	3.71667	0.45	3.43333
12	2.4	1.7	2.1	2.48333	4.91667	2.56667	5	3.56667	3.3	4.08333	2.38333	4.1	4.1	4.9	4.38333	5.6	4.5	4.08333	4.43333	3.23333	2.2	2.65	3.38333	2.91667	2.3	3.7	3.56667	4.8	4.41667	10.35	7.4	5.81667	8.68333	8.28333	6.06667	8.31667	5.85	3	4.35	9.53333				12	-0.0166667	2.4	2	2.41667	-0.533333
13	1.06667	0	0.6	0	3.06667	0.133333	0.0666667	2.65	5	0	0	0	2.13333	3.81667	2.1	2.33333	4	4.63333	2.33333	3.63333	0	6.36667	5.6		2.66667	6.53333	1.53333	0	0.0666667	0	0	0	2.56667		3.56667	2.18333	2.76667	4.5	4.7	3.2				13	-1.06667	0	1.53333	3.81667	-0.966667
14	6.43333	4.1	4.23333	6.2	3.81667	2.88333	0	3.2	4.8	4.3	4.6	6.01667	4.36667	4.66667	3.25	5.36667	4.16667	3.38333	3.61667	2.91667	0	0	3.8		2.66667	7.13333	4.61667	2.21667	10.8667	4.9	3.28333	6.43333	4.55		2.28333	2.46667	6.81667	3.48333	4.25	3.88333				14	-1.83333	1.91667	0.133333	-1.53333	-0.566667
15	0	2.36667	7.5	4.26667	1.58333	4.4	0	2.53333	5.33333	3.86667	3.91667	2.86667	4.98333	3.61667	1.83333	4.13333	5.43333	2.95	5.28333	2.48333	1.23333	6.61667	2.48333		3.81667	3	5.8	3.8	4.13333	4.18333	3.88333	4.28333	2.65		2.51667	3.86667	2.8	3.1	2.5	2.86667				15	3.91667	0.5	-2.51667	-0.65	0.25
16	3.93333	2.76667	1.9	4.61667	2.61667	1.88333	6.66667	5.28333	3.96667	3.23333	5.56667	4.45	5.16667	2.83333	3.73333	3.2	4.01667	2.28333	6.66667	5.13333	3.93333	8.41667	1.43333		2.06667	2.41667	3.28333	5.65	2.9	1.78333	4.2	7.38333	1.98333		2.8	7.03333	1.88333	3.13333	4.85	4.23333				16	1.63333	1.68333	3.26667	-1.78333	1.11667
17	0	5.38333	4	2.86667	4	2.38333	0	3.76667	4.26667	6.33333	3.4	3.71667	0	8.66667	4.28333	3.98333	6	3.48333	7.13333	6	2.6	3.36667	2.9		0	4.6	4.13333	4.13333	1.81667	0	2.83333	2.93333	2.53333		2.66667	2.93333	4.3	1	0	4				17	3.4	-1.66667	-4	5.8	0.283333
18	5.95	3.6	4	0	2.53333	7.93333	12.1333	4.01667	3.7	3.1	3.45	1.96667	3.21667	2.88333	2.88333	7.35	5.73333	2.65	3.26667	3.93333	0	8.61667	1.8		2.05	3.3	2.73333	0	0.9	3.33333	2.41667	8.03333	1.61667		1.71667	2.73333	5.1	0	8.16667	7.8				18	-2.5	-1.63333	-0.783333	2.88333	0.35
19	4.38333	3.06667	3.13333	3.95	4.23333	6.23333	5.13333	2.23333	2.53333	3.76667	5.15	0.533333	3.21667	7.6	3.5	2.13333	2.53333	2.73333	6.05	9.13333	1.81667	0	1.6		0.866667	3.73333	0	0	0	0	3.56667	6.73333	1.8		1.25	0	0	0	0	3.3				19	0.766667	-2.53333	0.0833333	3.65	-0.733333
20	3.93333	1.91667	4.73333	2.33333	5.1	3.13333	5.33333	2.56667	2.83333	8.23333	1.46667	6.1	4.1	3.43333	3.4	3.16667	2.91667	4.6	5.5	4.46667	3.93333	7.15	1.15		0	1.85	0	3.45	0	6.15	2.23333	3.88333	1.4		0	1.73333	4.41667	4.46667	3.41667	4.4				20	-2.46667	4.18333	-0.633333	1.1	-1.7
21	6.65	3.1	6.83333	2.78333	6.53333	3.96667	3.38333	2.08333	2.76667	3.16667	3.03333	5.76667	4.4	2.5	4.15	3.43333	4.78333	3.98333	3.61667	3.78333	0	4.7	1.43333		3.23333	3.16667	6.26667	2.06667	2.76667	2.85	1.2	4.11667	1.63333		1.83333	1.7	5.9	6.43333	4.4	2.85				21	-3.61667	2.66667	-2.43333	-0.283333	-2.38333
22	4.11667	2.66667	7.53333	3.08333	4.11667	3.3	3.96667	2.3	3.53333	3.68333	2.38333	5.73333	3.38333	2.9	4.7	3.96667	4.1	3.48333	3.56667	5.85	0	4.76667	1.43333		1.98333	2.65	0	3.58333	2.06667	3.76667	2.96667	7.26667	1.81667		2.1	2.2	5.83333	5.03333	3.78333	2.3				22	-1.73333	3.06667	-4.15	-0.183333	0.583333
23	2.93333	2.81667	16.5333	2.18333	7.4	2.73333	3.4	4.03333	2.38333	5.6	3.35	5.65	8	2.61667	10.2667	0	3.93333	2.88333	3.41667	4.6	5.01667	5.93333	0.916667			1.63333	3.93333	2.88333	0.833333	4.43333	0	5.5	1.51667		1.83333	2.26667	3.28333	0	1.96667	3.6				23	0.416667	2.83333	-8.53333	0.433333	2.86667
24	6	5.21667	0	6.13333	3.76667	0	7.56667	2.35	5.46667	0	4.75	0	0	3.06667	7.33333	7.75	4.21667	2.93333	0	5.11667	3.2	4.7	1.51667			0.9	4.81667	0	1.7	5.4	4.33333	3.26667	2.61667		2.28333	3.15	2.5	0	0	2.7				24	-1.25	-5.21667	0	-3.06667	3.56667
REM	REMS										REMS										REMS										REMS													REMS	REMS
Hr																																												Hr
1	1.31667	0.933333	0.983333	1.66667	0.866667	1.46667	0	1.13333	1.8	0.8	0	0	0	0	0	0	0	0	0	0	1.41667	1.05	0.983333	1.4	0.866667	1.33333	1.33333	0	1	1.66667	0.266667	0	0	0	0	0	0	0	0	0				1	-1.31667	-0.933333	-0.983333	-1.66667	-0.866667
2	0.966667	1.53333	1.06667	1.96667	1.81667	1.23333	1.5	1.1	1.86667	0.8	0	0	0	0	0	0	0	0	0	0	0	1.08333	1.6	2.08333	0.583333	1.3	0.633333	1.01667	1.4	1.6	0	0	0	0	0	0	0	0	0	0				2	-0.966667	-1.53333	-1.06667	-1.96667	-1.81667
3	0.8	1.35	1.46667	0.933333	0.7	1.01667	0.683333	1.48333	1.28333	2.63333	0	0	0	0	0	0	0	0	0	0	0.966667	1.11667	1	1.45	1.2	0.9	1.23333	0.6	1.36667	1.81667	0	0	0	0	0	0	0	0	0	0				3	-0.8	-1.35	-1.46667	-0.933333	-0.7
4	1.06667	1.56667	1.08333	1.13333	1.51667	0.916667	1.33333	1.33333	1.68333	0.85	0	0	0	0	0	0	0	0	0	0	0.95	1.23333	1.01667	1.4	1.15	1.95	2.03333	1.26667	1.33333	1.5	0	0	0	0	0	0	0	0	0	0				4	-1.06667	-1.56667	-1.08333	-1.13333	-1.51667
5	1.01667	1	1.83333	1.3	1.36667	0.95	1.5	1.28333	1.21667	2.06667	0	0	0	0	0	0	0	0	0	0	2.8	1.35	0.683333	1.53333	1.6	1.33333	1.4	3	1.76667	1.93333	0	0	0	0	0	0	0	0	0	0				5	-1.01667	-1	-1.83333	-1.3	-1.36667
6	0.7	1.56667	1.06667	1.86667	1.16667		2.96667	1.13333	1	0	1.51667	1.6	1.36667	1.53333	1.36667	1.36667	1.8	2.1	1.15	0.933333	1.55	1.7	1.6	1.06667	1.35	1.2	1.03333	1.8	1.6	2.01667	1.6	2.13333	1.55	1.53333	1.33333	1.55	2.03333	1.6	1.26667	1.16667				6	0.816667	0.0333333	0.3	-0.333333	0.2
7	0.816667	1.26667	1.76667	1.06667	2.2	1.25	1.06667	2.2	1.01667	1.16667	1.11667	1.56667	1.3	2.7	0.983333	1.06667	0.75	1.33333	1.23333	1.56667	1.63333	1.2	0.95	1.51667	1.28333	0.983333	1.46667	2.63333	2.1	2.33333	1.45	0.75	0.983333	2.33333	1.2	1.13333	0.866667	0.783333	1.2	1.83333				7	0.3	0.3	-0.466667	1.63333	-1.21667
8	0.833333	1.06667	1.41667	1.33333	1.33333	1	1.53333	0.95	2.26667	1.66667	1.13333	1.08333	1.05	1.08333	1.36667	0.816667	1.28333	0.966667	1.31667	0.966667	1.63333	1.16667	1.48333	1.35	1.33333	2.73333	2.3	1.06667	0.6	1.18333	2.63333	2.21667	0.883333	1.63333	2.55	1.08333	1.03333	1.13333	1.05	1.01667				8	0.3	0.0166667	-0.366667	-0.25	0.0333333
9	0.883333	1.96667	1.33333	1.1	1.16667	0.683333	1.23333	1.01667	1.43333	0.7	1.45	1.85	0.816667	1.86667	1.41667	1.6	1.63333	1.2	1.85	1.35	1.46667	0.683333	1.1	2.06667	1.63333	1.08333	2.21667	1.01667	1	1.61667	1.4	2.4	1.56667	0.9	1.45	2.76667	1	1.16667	1.6	1.23333				9	0.566667	-0.116667	-0.516667	0.766667	0.25
10	1.13333	1.01667	0.816667	1.61667	1.18333	1.15	1.93333	1.26667	1.3	0.95	0.533333	1.05	0.933333	0.733333	1.11667	1.21667	1.88333	1.15	1.15	2.66667	1.41667	0.766667	1.36667	2.11667	2.23333	1.06667	1.76667	1.63333	1.36667	2.03333	1.4	1.03333	1.05	1.05	1.96667	1.46667	1.73333	1.86667	2.2	1.68333				10	-0.6	0.0333333	0.116667	-0.883333	-0.0666667
11	0.95	0.95	1.11667	2.3	1.2	1.1	1.08333	1.25	2	1.3	1.13333	2.23333	1.48333	1.25	1.05	0.8	1.36667	0.966667	2.13333	1.43333	1.21667	1.55	1.2	2.1	0.766667	1.65	0.833333	1.21667	1.41667	1.83333	1.28333	2.26667	0.983333	1.7	1.23333	1.35	1.28333	1.33333	1.46667	1.35				11	0.183333	1.28333	0.366667	-1.05	-0.15
12	1.4	1.26667	1.4	0.616667	0.966667	1.18333	0.966667	1.2	1.06667	0.75	0.833333	1.28333	0.633333	1.6	1.66667	1.51667	1.1	0.883333	1.63333	1.13333	2.36667	0.7	1	1.83333	1.66667	1.5	0.8	0.883333	1.16667	3.2	0.983333	1.8	1.53333	1.51667	0.833333	1.21667	1.63333	1.23333	1.36667	1.8				12	-0.566667	0.0166667	-0.766667	0.983333	0.7
13	0	0	0	0	0	0	0	0	0	0	0	0	0	0.4	0	1.53333	1.13333	0.466667	0.933333	0	0	0	0		0	0	0	0	0	0	0	0	0.666667		0	0	0.466667	0	0.9	2.86667				13	0	0	0	0.4	0
14	0	0	0	0.633333	0.8	0	0	0	0	0	0	0.466667	2.06667	1.46667	1.26667	1.03333	0	0.333333	0.5	0.4	0	0	1.33333		0	0	0.6	1.8	0.533333	0.4	1.73333	0.866667	2.26667		1.73333	0.666667	1.53333	0.85	1.56667	0.966667				14	0	0.466667	2.06667	0.833333	0.466667
15	0	0	1	0	0	0.866667	0	0.933333	0.4	0	0	0.5	0.6	0.533333	0	1.1	1.33333	0.566667	1	0.716667	1.33333	1.26667	0.933333		1.4	0	1.1	1.13333	0	1.2	0.95	0.933333	0.733333		1.66667	1.46667	1.46667	0.916667	1.36667	0.466667				15	0	0.5	-0.4	0.533333	0
16	0	2.8	0.4	2.26667	0	0	0	0.5	1.33333	0.8	1.5	0.7	0.566667	1.33333	1.03333	1.33333	0.616667	0.666667	0.9	1.56667	0	1.66667	0		0.466667	1.06667	1.26667	1.43333	0.633333	0	0.766667	1.28333	0.5		0	2.06667	0.733333	1.6	1.45	0.666667				16	1.5	-2.1	0.166667	-0.933333	1.03333
17	0	0	0	0	0	0.666667	0	0	1	1.13333	0	0.8	0	0.6	1.33333	1.43333	1.6	0.8	0.533333	0	0	0	0		0	0	1.46667	1.13333	0	0	0.333333	0	1.86667		0.466667	0.95	1.13333	1	0	0				17	0	0.8	0	0.6	1.33333
18	0.933333	0	0	0	0.8	0	0	1.2	0.666667	0	0.633333	1.33333	0.533333	1.06667	0.8	1.66667	1.81667	0.983333	1.13333	0.733333	0	0.4	0		0	0	0	0	0	0	0	0.7	0		0.6	0.8	0	0	0.4	0.866667				18	-0.3	1.33333	0.533333	1.06667	0
19	0.4	0.266667	0.7	1.33333	1.61667	2.53333	0	0.433333	0.333333	0.566667	1.1	0	0.633333	1.53333	0	1.06667	0	1.13333	1.63333	0.8	0.866667	0	0		0	0	0	0	0	0	0.966667	0	1.13333		0.6	0	0	0	0	0				19	0.7	-0.266667	-0.0666667	0.2	-1.61667
20	0.0666667	0.266667	0.6	0	1.53333	1.21667	1.08333	0.633333	0.4	0.333333	0.366667	0.566667	0.8	0.4	2.13333	0.833333	1.16667	1.83333	0.8	1.1	0	0	2.06667		0	0	0	0.4	0	0	0.366667	0.833333	0.933333		0	1.53333	1.66667	1.26667	0.4	0.6				20	0.3	0.3	0.2	0.4	0.6
21	0.4	0.666667	1.46667	2.2	0	1.93333	0.6	0.766667	0.866667	0.55	0.766667	1.01667	1.08333	0	1.4	1.33333	1.35	0.933333	1.36667	0.8	0	0.7	0		0	0	1.33333	0.933333	0	1.06667	0	1.01667	0.433333		0.4	1.13333	1.46667	0.666667	0	0				21	0.366667	0.35	-0.383333	-2.2	1.4
22	0.266667	0.433333	0.733333	0	1.36667	0.933333	0.766667	0.483333	0.6	1.06667	0.733333	1.25	1.2	0.566667	1.2	0.933333	1.23333	0.233333	0.5	1.9	0	0.716667	1.46667		0.333333	0.266667	0	1.43333	0	0	0	1.68333	1.53333		0.466667	0.466667	0.433333	0.533333	0.6	0.633333				22	0.466667	0.816667	0.466667	0.566667	-0.166667
23	0	0.933333	0.533333	1.43333	0	0.933333	0.733333	1.15	0.666667	0.466667	0.5	1.86667	1	1.13333	0.933333	0	2.53333	0.933333	0.566667	0.666667	1.03333	0.6	0			0.666667	1.53333	0.533333	0	0	0	1.5	0		0	2.1	1	0	0	1				23	0.5	0.933333	0.466667	-0.3	0.933333
24	0.6	0.8	0	1.03333	0.766667	0	0.533333	0.683333	0.666667	0	0	0	0	0.4	0	0.333333	0.266667	0	0	0.483333	0	0.433333	0			0	2.4	0	0	0	0	0.883333	0.533333		0.333333	0.733333	1.33333	0	0	0.4				24	-0.6	-0.8	0	-0.633333	-0.766667
[truncated: 15 more columns]
