# Supplementary material for: Shank3 modulates sleep and expression of circadian transcription factors
Source: eLife journal article supplement (doi:10.7554/elife.42819), 2019-04-11
Supplement: supp [file elife-42819-supp-v1.zip › elife_poa_e42819_Figure_3_source_data_2.xls]

## Sheet: Fig.3A rmANOVA
	numDF	denDF	F-value	p-value
(Intercept)	1	18	2269.91	<0.0001
Time	2.486	44.742	236.598	<0.0001
Genotype	1	18	0.058	0.813
Time x Genotype	2.486	44.742	0.808	0.476

## Sheet: Fig.3B+3C ANOVA ttest
	Wild Type	Shank3ΔC	df	F-value	p-value
	mean ± SEM	mean ± SEM
Hours 6 - 7	120.06 ± 4.21	140.27 ± 4.02	1, 18	12.07	0.003
Hours 11 - 12	100.63 ± 2.27	98.08 ± 2.44	1, 18	0.59	0.454
Independent samples t-test for hours 6 - 7
Frequency (Hz)	Wild Type	Shank3ΔC	df	t-value	p-value	aCorrected p-value
	mean ± SEM	mean ± SEM
0	195.77 ± 11.38	193.79 ± 5.76	18	0.155767	0.877951	0.912
0.78125	200.13 ± 12.34	195.89 ± 6.21	13.288	0.306937	0.764	0.825
1.5625	198.44 ± 9.42	198.16 ± 6.53	18	0.0241307	0.981014	0.981
2.34375	187.98 ± 8.92	191.38 ± 6.65	18	-0.305765	0.763292	0.825
3.125	162.83 ± 8.63	176.46 ± 6.47	18	-1.26354	0.222517	0.262
3.90625	135.1 ± 6.83	161.23 ± 6.05	18	-2.86418	0.0103121	0.012
4.6875	119.26 ± 4.77	155.03 ± 6.05	18	-4.64159	0.000202843	<0.0001
5.46875	109.15 ± 4.02	143.8 ± 6.33	18	-4.62493	0.000210399	<0.0001
6.25	102.67 ± 3.58	132.73 ± 5.77	18	-4.4272	0.000325302	<0.0001
7.03125	100.52 ± 3.53	126.64 ± 5.44	18	-4.03242	0.000781343	0.003
7.8125	100.15 ± 3.41	124.94 ± 4.33	18	-4.4993	0.000277429	<0.0001
8.59375	102.01 ±3.82	125.44 ± 3.74	18	-4.38307	0.000358648	<0.0001
9.375	105.71 ± 4.27	125.31 ± 3.40	18	-3.5916	0.00208581	0.005
10.1562	107.76 ± 4.33	123.82 ± 2.86	18	-3.09457	0.00625308	0.008
10.9375	105.1 ± 4.22	120.62 ± 3.16	18	-2.94655	0.008631	0.012
11.7188	102.62 ± 3.79	118.45 ± 2.91	18	-3.31423	0.00385814	0.006
12.5	103 ± 3.96	120.15 ± 3.00	18	-3.45673	0.00281441	0.005
13.2812	102.33 ± 4.33	122.26 ± 3.90	18	-3.41962	0.00305573	0.005
14.0625	100.69 ± 4.26	124.58 ± 4.85	18	-3.69996	0.00163881	0.005
14.8438	99.84 ± 4.38	127.52 ± 6.46	18	-3.54623	0.00230719	0.005
15.625	99.13 ± 4.07	126.09 ± 6.64	18	-3.46226	0.0027801	0.005
16.4062	98.23 ± 3.84	125.52 ± 6.31	18	-3.69539	0.00165558	0.005
17.1875	96.56 ± 3.55	125.82 ± 6.60	18	-3.90217	0.00104434	0.003
17.9688	95.49 ± 3.44	121.58 ± 6.76	18	-3.4407	0.00291628	0.005
18.75	95.38 ± 3.72	120.43 ± 6.75	18	-3.24892	0.00445596	0.006
19.5312	95.71 ± 3.54	119.47 ± 6.71	18	-3.13341	0.00574343	0.008
a Benjamini-Hochberg FDR

## Sheet: Fig.3D+3E+3F ttest
	Wild Type	Shank3ΔC	df	t-value	p-value
	mean ± SEM	mean ± SEM
Latency to NREM (min)	5.45 ± 1.54	18.48 ± 5.44	10.44	-2.31	0.043
Latency to REM (min)	22.63 ± 2.80	28.03 ± 5.31	13.64	-0.9	0.383
Time in NREM (min)
Hours 6 – 7	73.96 ± 2.31	59.33 ± 4.60	13.26	2.85	0.014
Hours 8 – 12	173.51 ± 3.38	185.55 ± 3.55	18	-2.46	0.024
Time in REM (min)
Hours 6 – 7	11.60 ± 1.40	9.87 ± 1.46	18	0.86	0.403
Hours 8 – 12	27.45 ± 1.22	29.00 ± 1.25	18	-0.89	0.385

## Sheet: Fig.3 fig_supl 1A+1B rmANOVA
Repeated Measures ANOVA
		numDF	denDF	F-value	p-value
Wild Type
Wakefulness
Hours 6 - 24	(Intercept)	1	17	2851.49	<0.0001
	Time	18	306	33.236	<0.0001
	Treatment	1	17	14.389	0.001
	Time x Treatment	18	306	2.054	0.007
NREM
Hours 6 - 24	(Intercept)	1	17	1674.62	<0.0001
	Time	18	306	27.83	<0.0001
	Treatment	1	17	10.6	0.005
	Time x Treatment	18	306	2.125	0.005
REM
Hours 6 - 24	(Intercept)	1	17	1096.53	<0.0001
	Time	18	306	32.85	<0.0001
	Treatment	1	17	26.922	<0.0001
	Time x Treatment	18	306	1.149	0.303
Shank3ΔC
Wakefulness
Hours 6 - 24	(Intercept)	1	14	1549.67	<0.0001
	Time	18	252	30.312	<0.0001
	Treatment	1	14	1.39	0.258
	Time x Treatment	18	252	2.284	0.003
NREM
Hours 6 - 24	(Intercept)	1	14	625.148	<0.0001
	Time	18	252	25.943	<0.0001
	Treatment	1	14	1.176	0.297
	Time x Treatment	18	252	1.99	0.011
REM
Hours 6 - 24	(Intercept)	1	14	725.548	<0.0001
	Time	18	252	35.318	<0.0001
	Treatment	1	14	1.773	0.204
	Time x Treatment	18	252	3.314	<0.0001
Posthoc Pairwise Comparisons (Sidak Correction)
Hour	p-value
	Wakefulness	NREM	REM
	Wild Type
6	0.245681	0.222932	0.587822
7	0.97285	0.930679	0.687571
8	0.0647594	0.0663018	0.253287
9	0.560929	0.371295	0.301453
10	0.525251	0.358788	0.506473
11	0.301427	0.2118	0.849826
12	0.0111588	0.0143841	0.109473
13	0.0336518	0.0490938	0.0291888
14	0.054418	0.0825198	0.0388912
15	0.0069134	0.00957598	0.0142614
16	0.00182846	0.00151061	0.0321517
17	0.453726	0.534391	0.0847478
18	0.0038986	0.00756112	0.000433895
19	0.330875	0.21313	0.273352
20	0.0052722	0.00698699	0.026565
21	0.431409	0.644123	0.0176681
22	0.398543	0.476072	0.254497
23	0.962387	0.867286	0.483744
24	0.449557	0.510731	0.0542515
	Shank3ΔC
6	0.0138202	0.0168536	0.0301815
7	0.0537155	0.104655	0.00926147
8	0.150619	0.136191	0.302128
9	0.600409	0.583582	0.781491
10	0.974518	0.819138	0.200656
11	0.530957	0.629459	0.357275
12	9.9383e-07	2.1396e-06	0.140706
13	0.0540931	0.0692671	0.0553173
14	0.0414499	0.0812278	0.0110549
15	0.132435	0.211964	0.00396127
16	0.199913	0.263624	0.0647499
17	0.378297	0.446845	0.146681
18	0.392285	0.421158	0.0962632
19	0.45206	0.471189	0.339728
20	0.602777	0.750609	0.0423168
21	0.7107	0.819069	0.327077
22	0.378467	0.391869	0.448466
23	0.931676	0.983431	0.60258
24	0.386607	0.345524	0.576078

## Sheet: Fig.3 fig_supl 1C rmANOVA
Repeated Measures ANOVA
		numDF	denDF	F-value	p-value
Wakefulness
Hours 6 - 24	(Intercept)	1	16	1890.86	<0.0001
	Time	18	288	27.66	<0.0001
	Genotype	1	16	6.485	0.022
	Time x Genotype	18	288	2.025	0.009
NREM
Hours 6 - 24	(Intercept)	1	16	1249.99	<0.0001
	Time	18	288	24.858	<0.0001
	Genotype	1	16	6.209	0.024
	Time x Genotype	18	288	1.928	0.014
REM
Hours 6 - 24	(Intercept)	1	16	1058.23	<0.0001
	Time	18	288	22.638	<0.0001
	Genotype	1	16	5.026	0.039
	Time x Genotype	18	288	1.716	0.036
Posthoc Pairwise Comparisons (Sidak Correction)
Hour	p-value
	Wakefulness	NREM	REM
6	0.127276	0.0802413	0.851217
7	0.0606203	0.0838568	0.10247
8	0.915402	0.88274	0.893554
9	0.999632	0.73239	0.177551
10	0.686285	0.757778	0.372163
11	0.474868	0.514113	0.528528
12	0.0155551	0.0070263	0.58658
13	0.303504	0.328046	0.387317
14	0.372349	0.563426	0.0788228
15	0.894546	0.666621	0.1176
16	0.780764	0.836603	0.5531
17	0.250404	0.225656	0.764005
18	0.0141271	0.0272684	0.0009115
19	0.0452308	0.0495449	0.0410067
20	0.00221447	0.00161305	0.132708
21	0.092542	0.108202	0.0852936
22	0.101638	0.0800855	0.375355
23	0.609753	0.642877	0.513989
24	0.814051	0.731072	0.2249

## Sheet: Fig.3 fig_sup 2 bout num & dur
Repeated Measures ANOVA
		numDF	denDF	F-value	p-value
Average Number Bouts / Hour
Wakefulness
Hours 6 - 24	(Intercept)	1	17	0.347	0.564
	Time	1.341	22.798	11.65	0.001
	Genotype	1	17	0.347	0.564
	Time x Genotype	1.341	22.798	1.443	0.251
NREM
Hours 6 - 24	(Intercept)	1	17	0.092	0.765
	Time	1.484	25.224	16.802	<0.0001
	Genotype	1	17	0.318	0.58
	Time x Genotype	1.484	25.224	1.189	0.308
REM
Hours 6 - 24	(Intercept)	1	17	7.849	0.012
	Time	1.449	24.625	24.838	<0.0001
	Genotype	1	17	0.055	0.817
	Time x Genotype	1.449	24.625	2.601	0.108
Average Bout Duration (min)
Wakefulness
Hours 6 - 24	(Intercept)	1	17	9.075	0.008
	Time	2	34	25.502	<0.0001
	Genotype	1	17	0.213	0.65
	Time x Genotype	2	34	1.48	0.242
NREM
Hours 6 - 24	(Intercept)	1	17	19.114	<0.0001
	Time	2	34	8.092	0.001
	Genotype	1	17	0.421	0.525
	Time x Genotype	2	34	0.615	0.547
REM
Hours 6 - 24	(Intercept)	1	17	27.383	<0.0001
	Time	2	34	8.138	0.001
	Genotype	1	17	0.002	0.963
	Time x Genotype	2	34	0.564	0.574
