# Supplementary material for: Shank3 modulates sleep and expression of circadian transcription factors
Source: eLife journal article supplement (doi:10.7554/elife.42819), 2019-04-11
Supplement: supp [file elife-42819-supp-v1.zip › elife_poa_e42819_Figure_4_figure_supplement_1.pdf]

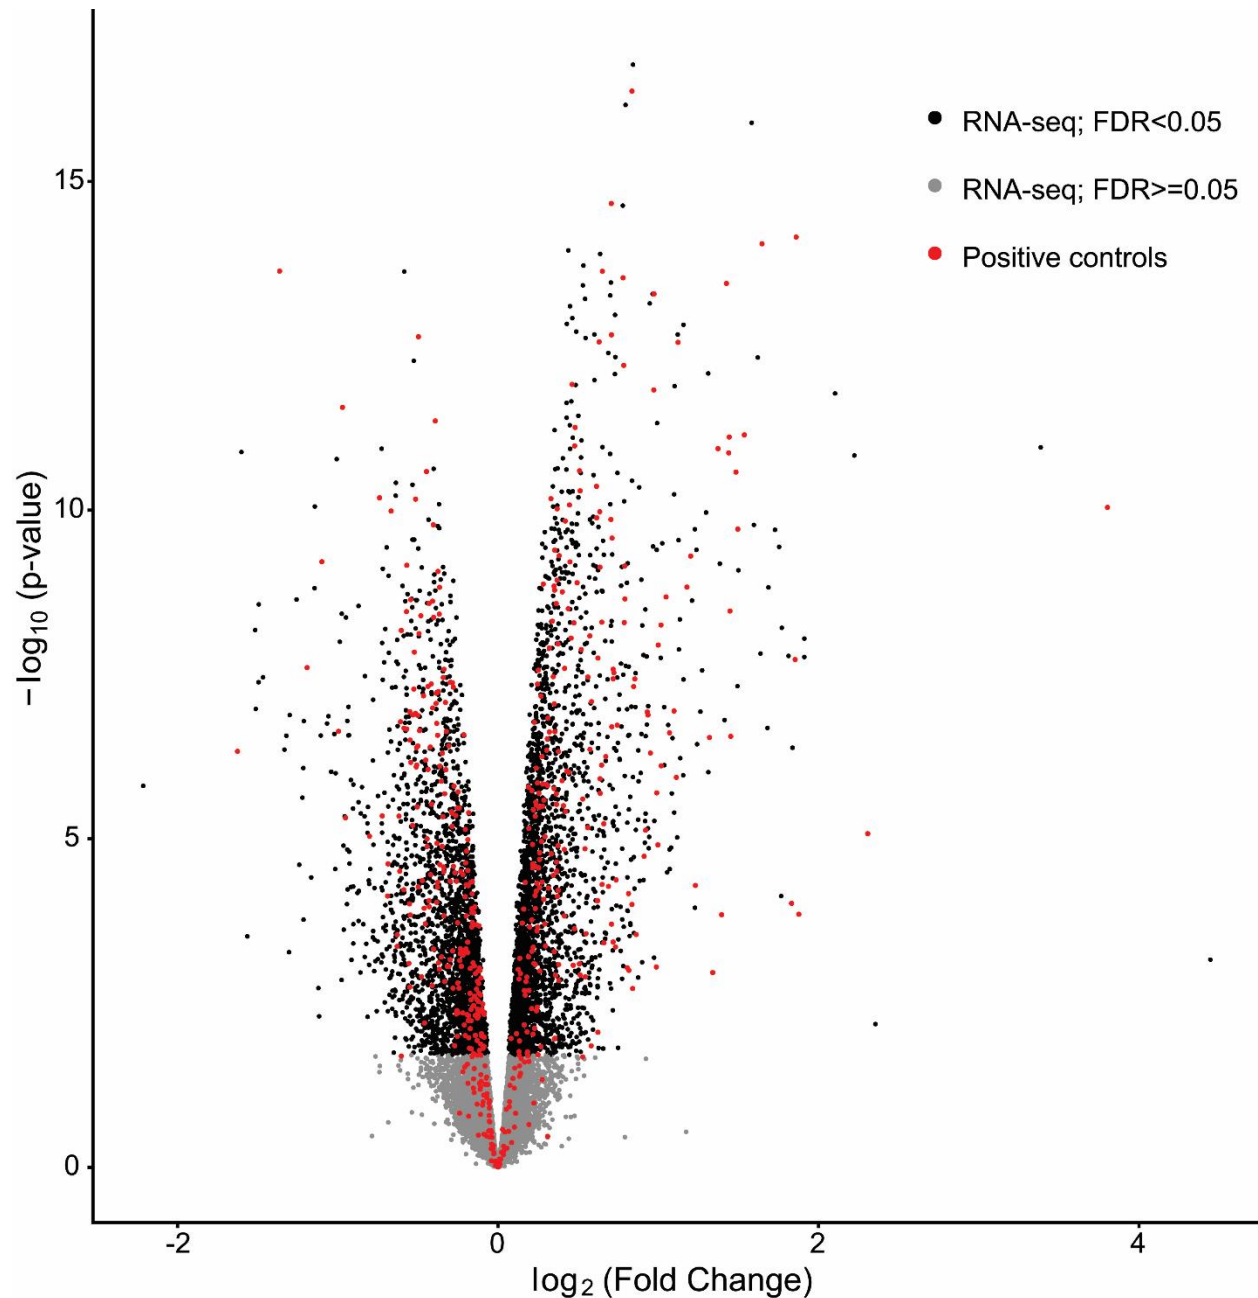

**Figure 4 – figure supplement 1.** Recovery of positive control genes regulated by sleep deprivation. Volcano plot of differential expression ( $-\log_{10}$  P-value versus  $\log_2$  fold change) caused by sleep deprivation in wild type animals (HC5 vs SD5). Genes with an  $\text{FDR} < 0.05$  are highlighted in black. Positive controls (obtained from Gerstner et al. 2016 as described in Methods) are highlighted in red. Our RNA-seq analysis is able to detect 78% (454) of the 579 positive control genes obtained by microarrays as differentially expressed at  $\text{FDR} < 0.05$ .
