# Supplementary material for: Shank3 modulates sleep and expression of circadian transcription factors
Source: eLife journal article supplement (doi:10.7554/elife.42819), 2019-04-11
Supplement: supp [file elife-42819-supp-v1.zip › elife_poa_e42819_Figure_4_source_data_1.xlsx]

## Sheet: Shank3vWT_HC_FDR0.1
Entrez Gene ID	KOHC5 normalized read count	WTHC5 normalized read count	logFC	logCPM (average)	F	PValue	FDR	gene
11434	169	95.4	0.785301	1.8712	60.7704	5.23384e-08	0.000189125	Acr
74127	146.6	94.4	0.588965	2.98569	32.1689	2.00297e-05	0.01703	Krt80
20849	375	271.4	0.459915	1.25672	21.0408	0.000120608	0.0458756	Stat4
11516	5119.8	3729.4	0.45365	5.00006	31.4074	6.45642e-05	0.033329	Adcyap1
18030	968.6	705	0.436969	3.34052	32.2813	8.72679e-06	0.0105114	Nfil3
14284	845.4	624.4	0.434419	4.95025	22.5759	0.000351505	0.0847702	Fosl2
53324	6429	4787.8	0.425492	6.15839	32.0087	7.81793e-05	0.0352873	Nptx2
16476	3958.6	3048.2	0.373256	5.7317	58.1053	2.4312e-07	0.000702811	Jun
433586	331.4	266.4	0.303336	3.45289	22.5266	8.05647e-05	0.0352873	Maml3
16835	579.4	469.6	0.30168	4.69832	42.0155	1.0927e-06	0.00197423	Ldlr
64099	212.8	172.6	0.297448	2.69355	19.7375	0.000173908	0.0563274	Parvg
20677	551.4	448.6	0.288784	4.06537	32.476	7.37336e-06	0.0096886	Sox4
24066	422.4	350.4	0.267307	3.86694	22.6618	7.77133e-05	0.0352873	Spry4
20604	3006.4	2570.4	0.223121	7.29136	31.6967	1.34802e-05	0.0149879	Sst
223827	234	201.2	0.211846	4.26139	23.0939	6.93145e-05	0.0338771	Gxylt1
69908	2091	1809.2	0.205573	5.68238	21.7427	0.000114656	0.0448446	Rab3b
20356	1721	1494.6	0.200961	5.63054	25.4778	3.76057e-05	0.0258835	Sema5a
223881	1967	1710.4	0.199575	4.96948	19.5789	0.000181971	0.0563274	Rnd1
11984	12628.6	10990.8	0.199343	7.98124	28.3608	2.62451e-05	0.0210748	Atp6v0c
114565	462.8	405	0.191023	4.30739	17.6432	0.000321278	0.0800647	Zbtb21
72290	6535.6	5736.8	0.188702	5.59103	17.2048	0.000396205	0.0909007	Lsm11
69219	7145.6	6296.4	0.183006	6.82683	34.9741	4.33704e-06	0.00696529	Ddah1
72301	4093.8	3620.8	0.175725	5.91033	23.9653	5.52219e-05	0.0306991	1810041L15Rik
237403	961.2	855	0.173841	4.98189	16.5424	0.000449763	0.0956746	Lingo3
15357	10809.6	9641.8	0.163856	7.24875	21.8532	9.782e-05	0.041585	Hmgcr
12805	15266.4	13664	0.159321	8.79324	29.0845	1.57863e-05	0.0151783	Cntn1
81840	2908	2602.6	0.158833	5.93387	19.9662	0.000162952	0.0563274	Sorcs2
19736	33190.2	29850.4	0.152169	9.32749	21.4757	0.000114795	0.0448446	Rgs4
171180	3357.4	3023.4	0.15049	5.22679	19.9144	0.000165364	0.0563274	Syt12
231070	3363.4	3032.2	0.148878	5.79594	26.2193	3.12911e-05	0.0238043	Insig1
73826	9109.6	8264.4	0.140227	6.32957	16.5983	0.000442036	0.0956746	Poldip3
232370	24276	22046.8	0.138564	8.91904	20.7387	0.000131151	0.0486067	Clstn3
70439	1966	1797.4	0.127575	5.67146	17.2358	0.000363452	0.0861202	Taf15
338372	10059.8	9231.8	0.123097	7.10322	17.9881	0.000289723	0.0775492	Map3k9
68203	28349.4	26174.2	0.114694	8.8952	19.2533	0.000199842	0.0589493	Diras2
72349	16741	15461.2	0.114345	7.77628	24.8596	4.39324e-05	0.0267165	Dusp3
13199	19279.4	20851.8	-0.111958	10.0186	16.4508	0.000462745	0.0969351	Ddn
16581	7672.4	8302.6	-0.113595	9.15625	17.3421	0.00035189	0.0847702	Kifc2
56219	2701.6	2936.2	-0.118756	6.49548	16.5399	0.000450109	0.0956746	Extl1
76795	5991.6	6516.2	-0.12011	8.04101	18.0627	0.00028335	0.0775492	Tbc1d9b
215707	1477.6	1608.6	-0.122881	6.32823	19.4828	0.000187056	0.0563274	Ccdc92
269615	4143.6	4537.2	-0.129656	7.02362	17.7484	0.000311274	0.0789326	Plch2
217082	7164.6	7877.4	-0.136014	7.81723	23.0396	7.03137e-05	0.0338771	Hlf
54006	757.6	836	-0.141874	5.42184	19.7716	0.000172221	0.0563274	Deaf1
19944	505	557.8	-0.1451	5.63311	18.1774	0.000273847	0.0775492	Rpl29
231148	2348	2605	-0.149502	7.53471	18.1246	0.000285263	0.0775492	Ablim2
26417	2238.4	2486.8	-0.153189	7.08676	18.5648	0.000246816	0.0713497	Mapk3
211232	1584.8	1768.8	-0.156876	6.60169	25.6233	3.62651e-05	0.0258835	Cpne9
13712	2073.6	2318.4	-0.158986	6.39811	29.1543	1.55329e-05	0.0151783	Elk1
20190	380.8	431.2	-0.178122	5.7976	17.3712	0.000378371	0.0882092	Ryr1
238384	475.4	542	-0.18485	5.12826	21.4957	0.000106433	0.0439537	Slc24a4
12153	1765	2008.2	-0.185314	6.66025	28.8164	1.68017e-05	0.0151783	Bmp1
14860	1303.4	1483.2	-0.18574	4.96951	19.5333	0.000184365	0.0563274	Gsta4
21685	17095	19530.4	-0.190345	8.54059	26.5464	4.05835e-05	0.0266633	Tef
72168	5525.4	6318.6	-0.191215	7.18028	21.0185	0.000174169	0.0563274	Aifm3
286940	823.4	966	-0.229922	6.85353	20.3656	0.000310892	0.0789326	Flnb
52430	210.2	248	-0.236524	4.06181	16.6498	0.000435043	0.0956746	Echdc2
19418	10992.8	13060.6	-0.248325	7.87402	83.4715	2.97449e-09	1.43311e-05	NA
18628	767.4	924.8	-0.266437	5.98221	35.6211	5.84052e-06	0.00844189	Per3
69440	1295.4	1559.6	-0.268786	6.38924	47.0156	5.54146e-07	0.00133494	Dennd6b
320506	102.4	125.6	-0.28694	4.04392	19.7432	0.000178567	0.0563274	Lmbrd2
68708	816.4	1074	-0.398706	5.00688	85.2876	2.43027e-09	1.43311e-05	Rabl2
83762	1024.6	1374.8	-0.418897	5.87637	56.6252	8.36063e-07	0.00172635	Otof
66725	1251.8	1719.6	-0.453068	5.97128	101.607	1.26827e-09	1.43311e-05	Lrrk2
100503620	39.4	58.2	-0.512022	0.211626	16.7566	0.000420927	0.0950638	NA
21941	33.2	50.2	-0.56799	1.12598	24.8213	4.43612e-05	0.0267165	Tnfrsf8
50706	46.2	70.8	-0.582195	2.08777	19.5278	0.000303254	0.0789326	Postn
76645	48.4	73.4	-0.588651	0.45003	24.0515	5.40079e-05	0.0306991	Pkd1l2
269589	422.8	1004.6	-1.14936	1.13057	29.0709	6.28744e-05	0.033329	Sytl1

## Sheet: Shank3vWT_SD_FDR0.1
Entrez Gene ID	KOSD5 normalized read count	WTSD5 normalized read count	logFC	logCPM (average)	F	PValue	FDR	gene
11434	110	60.8	0.931843	1.8712	44.4383	7.04e-07	0.00234848	Acr
14313	125.8	70.2	0.834107	1.61818	42.425	1.14e-06	0.00234848	Fst
217294	146	99	0.615102	1.00282	17.3375	0.000352391	0.0553636	NA
26570	2444.2	1615	0.601861	5.62583	25.9077	0.000300608	0.0511175	Slc7a11
68498	102	73.6	0.501875	2.42019	24.4265	4.91e-05	0.0202563	Tspan11
100039826	49	35.4	0.473746	3.38118	29.6149	1.94e-05	0.0114478	NA
69847	36.4	26.4	0.432049	2.88629	23.4367	6.4e-05	0.0228464	Wnk4
271305	429	331.4	0.375736	4.00576	22.6016	0.000117186	0.0303395	Phf21b
73284	4042.8	3151	0.366955	4.77031	42.8878	1.05e-06	0.00234848	Ddit4l
17969	75	59.2	0.350421	2.35728	19.3011	0.000197102	0.0390262	Ncf1
12140	776	617.2	0.340405	4.05865	20.5911	0.000173053	0.0362508	Fabp7
63953	195.2	158	0.321041	2.69923	16.6964	0.000428829	0.0619829	Dusp10
223827	266.8	215.4	0.307514	4.26139	42.4649	1.01e-06	0.00234848	Gxylt1
18610	264.2	218	0.284769	3.58627	19.1129	0.000208125	0.0403417	Pdyn
105827	694.2	576.2	0.268811	3.30427	18.9847	0.000216016	0.0410829	Amigo2
20604	2851.8	2374.4	0.264784	7.29136	40.8877	2.38e-06	0.00365219	Sst
18003	236.8	196.8	0.263344	3.72901	21.8834	9.58e-05	0.0261192	Nedd9
20346	2915	2446.8	0.253762	4.76604	36.6316	3.09e-06	0.00372073	Sema3a
19699	2003.6	1704.8	0.231421	6.54333	28.6361	2.41e-05	0.0120087	Reln
14412	250.6	213.8	0.229303	3.65441	14.3305	0.000912997	0.0990021	Slc6a13
72290	9914.2	8484	0.226125	5.59103	23.8581	6.38e-05	0.0228464	Lsm11
67498	4890.6	4202.2	0.219361	6.47371	21.7794	0.00014842	0.0335196	Kcnv1
100503068	7058.8	6120.6	0.206225	5.52389	21.1556	0.00011851	0.0303395	NA
81703	917.2	797	0.2039	5.28715	18.9645	0.000219654	0.0412322	Jdp2
53625	689.6	602.8	0.199558	4.6884	22.6936	7.71e-05	0.0247513	B3gnt2
79221	807.8	709.2	0.195158	5.44446	16.5935	0.000452714	0.0641522	Hdac9
12843	601.8	525.8	0.194048	4.06298	14.3145	0.000917828	0.0990021	Col1a2
22353	12661	11099.6	0.191668	5.99435	22.3457	8.46e-05	0.0253036	Vip
14706	2238.4	1963	0.190003	5.44824	20.1626	0.000154141	0.0341474	Gng4
64009	12141.8	10672.4	0.184776	9.37278	25.388	5.33e-05	0.0212351	Syne1
105722	952	843	0.177091	5.20025	16.418	0.000467496	0.065197	Ano6
67187	651.8	578.6	0.176004	4.13225	15.328	0.000659764	0.0836511	Zmynd19
15357	9621	8527.4	0.174221	7.24875	22.5275	8.16e-05	0.0253036	Hmgcr
240185	5700	5053.6	0.173694	7.56873	28.5216	1.8e-05	0.0113125	Jcad
236920	3786.2	3363	0.171274	6.0307	26.3368	3.04e-05	0.0146471	Stard8
106042	9122.4	8125.4	0.167124	6.98129	19.8627	0.000170725	0.0362508	Prickle1
19271	5080	4534	0.164571	7.47564	17.7557	0.000362964	0.0564117	Ptprj
19736	30188.2	27150.8	0.153397	9.32749	20.7975	0.000138021	0.0321768	Rgs4
171180	3637.4	3277	0.150321	5.22679	17.7131	0.000314594	0.052266	Syt12
26408	5347.4	4827.4	0.150072	5.99265	15.396	0.000645546	0.0825728	Map3k5
330941	21241.8	19177.4	0.149504	7.59958	17.5054	0.000338199	0.0543147	AI593442
57780	2514.8	2276.4	0.144628	6.01805	17.4189	0.000343797	0.0546071	Fxyd7
16526	2960.4	2681	0.142848	5.84115	17.9437	0.000293588	0.0506619	Kcnk2
12805	14758.8	13367.6	0.142483	8.79324	22.12	8.98e-05	0.0253036	Cntn1
30785	5937.4	5394.8	0.142023	7.17532	14.982	0.000741674	0.0893346	Cttnbp2
270210	3283.2	2980.8	0.140817	6.60606	17.7152	0.000314392	0.052266	Zfp651
226412	18157	16486.4	0.139661	9.08391	27.8605	2.1e-05	0.0116724	R3hdm1
15982	2823.6	2562.2	0.139634	5.42868	17.9342	0.000294423	0.0506619	Ifrd1
240427	1223	1111.2	0.138589	5.68516	17.026	0.000387497	0.0580684	Setbp1
14057	1345.6	1224.2	0.137256	5.6011	15.053	0.000720893	0.0883033	Sfxn1
13384	1905.2	1736	0.135277	5.72696	22.2327	8.72e-05	0.0253036	Mpp3
69219	7397	6768	0.128719	6.82683	15.9315	0.000544484	0.0735511	Ddah1
100503659	5574.6	5104	0.127227	7.90897	22.1673	8.87e-05	0.0253036	Cbarp
67945	1802.6	1650.8	0.127174	6.91064	17.1486	0.000373241	0.0573918	Rpl41
27223	4315.2	3972.8	0.119805	7.17933	19.8178	0.000169971	0.0362508	Trp53bp1
18212	14338.8	13231.6	0.115034	9.11448	14.7556	0.000794054	0.0927219	Ntrk2
16525	5430.6	5016.8	0.114707	6.69309	14.4745	0.000870664	0.0962302	Kcnk1
72590	16150.8	15044.2	0.102256	8.2335	16.6079	0.000440719	0.0630709	Ppme1
72349	15900.8	14933.4	0.0908017	7.77628	14.6713	0.00081621	0.0937522	Dusp3
26413	30582.8	32519	-0.0891863	9.41963	14.7502	0.000795456	0.0927219	Mapk1
380711	18638.4	19943.4	-0.0975395	8.72493	14.4599	0.000874866	0.0962302	Rap1gap2
268480	6456.6	6911	-0.0978423	7.67909	15.7729	0.000572493	0.0745479	Rapgefl1
67155	16094.4	17281.8	-0.102188	8.69735	14.6674	0.000817267	0.0937522	Smarca2
263764	9080.2	9796.4	-0.108866	7.22198	14.5398	0.000852178	0.0962296	Creg2
240753	5293.2	5730.4	-0.114795	7.65964	17.5079	0.000334661	0.0543147	Plekha6
319263	5350.8	5795.6	-0.115371	6.69173	14.8003	0.000782542	0.092712	Pcmtd1
234353	13565.4	14700.4	-0.115784	9.05465	23.2985	6.57e-05	0.0228464	Psd3
54525	22785	24747.6	-0.117704	8.95155	20.5605	0.000137837	0.0321768	Syt7
13199	20063.4	21836.8	-0.121336	10.0186	18.6562	0.000237768	0.0435025	Ddn
22141	14635.8	15925.4	-0.122441	8.3433	20.1218	0.000155924	0.0341474	Tub
381310	21494.4	23404.2	-0.122474	8.94247	22.8843	7.33e-05	0.0240655	Stum
140570	979.6	1071	-0.127748	6.06186	16.4069	0.000469108	0.065197	Plxnb2
26913	8626.8	9438.2	-0.130235	7.23969	20.3546	0.000146023	0.0335019	Gprin1
68524	5933	6501.6	-0.131884	6.77059	15.0841	0.0007137	0.0881694	Wipf2
269994	1584	1738.8	-0.1365	6.78758	15.8248	0.000563148	0.0739977	Gsg1l
13712	2435.6	2685.4	-0.138944	6.39811	20.6021	0.000136242	0.0321768	Elk1
18164	28110	30949.4	-0.139757	9.16877	21.059	0.000120003	0.0303395	Nptx1
57748	2266	2503	-0.141165	5.86311	15.2256	0.000681849	0.0856995	Jmy
16524	3657.2	4040.2	-0.143443	7.42052	29.5457	1.42e-05	0.0107963	Kcnj9
26874	1450.4	1615	-0.15205	5.65845	14.4462	0.000878814	0.0962302	Abcd2
216881	485.2	539.6	-0.156135	5.7494	16.7686	0.000419379	0.0618541	Wscd1
100043757	1938.6	2155.8	-0.157281	5.50698	18.01	0.000287836	0.0506619	Zfp831
12337	1979	2214.4	-0.159948	6.01517	21.0069	0.000121744	0.0303395	Capn5
56219	2407.4	2695	-0.163004	6.49548	27.7111	2.18e-05	0.0116724	Extl1
211232	1404	1580.2	-0.171988	6.60169	27.4396	2.33e-05	0.0120087	Cpne9
110058	1863.6	2099.4	-0.172251	5.68862	19.093	0.000209328	0.0403417	Syt17
320563	2385.6	2687.2	-0.174315	6.74515	25.1897	4.04e-05	0.0171839	Islr2
108097	3414.8	3867	-0.179397	6.15244	32.8781	6.76e-06	0.00651267	Prkab2
103098	2533.6	2866.2	-0.181351	5.45035	28.631	1.75e-05	0.0113125	Slc6a15
12123	1713	1936	-0.181479	5.79982	18.8176	0.000226795	0.0420269	Hrk
217082	8087.2	9167.2	-0.18179	7.81723	39.3607	1.8e-06	0.00325814	Hlf
217166	3351.2	3813.6	-0.186288	7.45339	26.0161	3.42e-05	0.0154573	Nr1d1
103534	1269.4	1444.2	-0.188595	5.64171	28.117	1.98e-05	0.0114478	Mgat4b
21685	17870.8	20386.8	-0.189326	8.54059	25.29	5.44e-05	0.0212351	Tef
19094	3421.2	3904.6	-0.192678	6.60607	25.296	4e-05	0.0171839	Mapk11
666211	1867.8	2141.8	-0.200356	4.12547	19.3908	0.000192071	0.0385583	NA
59126	376.6	431.6	-0.200825	4.48147	16.7193	0.000425803	0.0619829	Nek6
74782	964.6	1112.6	-0.210181	4.40843	14.8293	0.000775206	0.0926018	Glt8d2
70717	1092.6	1261	-0.217415	5.00897	20.7105	0.000132184	0.0321768	Medag
17777	891.8	1039.4	-0.223542	3.70051	17.5427	0.000331164	0.0543147	Mttp
246738	687.2	802.8	-0.223602	3.93844	17.0891	0.000380079	0.057828	Dnajc28
18628	905.8	1058.4	-0.230027	5.98221	24.7711	5.98e-05	0.0227563	Per3
56233	1246	1466.2	-0.236886	5.56192	28.5326	1.8e-05	0.0113125	Hdac7
223828	1722.4	2026	-0.238418	5.05453	29.8555	1.32e-05	0.0107475	Pphln1
238384	535	632.8	-0.243245	5.12826	33.5234	5.89e-06	0.00607606	Slc24a4
75578	547.4	647.8	-0.253644	3.41136	14.5795	0.000841139	0.0957309	Fggy
243538	119.8	141.6	-0.257713	2.84085	15.9767	0.000536776	0.073194	Cfap100
17181	1616.4	1926.2	-0.259076	5.47134	34.0196	5.38e-06	0.00597744	Matn2
71919	880.8	1051	-0.26084	4.50244	25.9293	3.36e-05	0.0154573	Rpap3
69440	1019.6	1241.8	-0.282681	6.38924	44.7933	8.08e-07	0.00234848	Dennd6b
231842	107.2	130	-0.282787	3.47604	15.5446	0.000615597	0.079445	Amz1
30805	304.6	370.4	-0.290511	2.90748	15.1581	0.00069684	0.0868286	Slc22a4
71733	432.4	526.4	-0.290895	4.34027	16.6684	0.000551659	0.0738303	Susd2
83762	1080.6	1325.2	-0.296522	5.87637	24.7919	0.000114765	0.0303395	Otof
19009	4106.4	5045	-0.297482	7.09943	35.4926	1.34e-05	0.0107475	Pou6f1
66725	1617.8	2004.8	-0.311106	5.97128	46.4892	8.33e-07	0.00234848	Lrrk2
19734	150	184.6	-0.315915	3.4163	22.0713	9.1e-05	0.0253036	Rgs16
101631	103.2	131.2	-0.355778	3.23352	16.2991	0.000558493	0.0739977	Pwwp2b
433809	153.2	196.6	-0.361569	3.1773	14.993	0.000865842	0.0962302	Rnf207
66208	2710	3487.4	-0.362375	2.22615	14.979	0.000738392	0.0893346	Nenf
79362	359	459.2	-0.367927	3.45673	17.0311	0.000484021	0.066629	Bhlhe41
244954	197.2	253.2	-0.372756	2.84914	19.6949	0.000176034	0.0363485	Prss35
68708	804.4	1044.4	-0.378698	5.00688	65.6668	2.65e-08	0.000383326	Rabl2
319480	56.6	75.6	-0.452792	1.97178	17.0967	0.000389694	0.0580684	Itga11
380967	892.6	1221	-0.454992	4.24344	39.7794	2.94e-06	0.00372073	Tmem106c
22146	682	1011.4	-0.560859	4.40676	30.6294	6.99e-05	0.0234961	Tuba1c
81600	24.2	38.2	-0.65589	0.84429	19.5463	0.000183684	0.0373938	Chia1
74720	22.4	36.2	-0.729196	0.888644	28.5767	1.78e-05	0.0113125	Tmem114
210541	0	0	-0.949152	0.0500435	18.5022	0.000248769	0.0449464	NA
18378	0	0	-1.61117	-0.599823	24.1775	6.64e-05	0.0228464	Omp
109901	8.4	42.8	-2.53529	0.141566	28.9215	8.57e-05	0.0253036	Cela1
13087	0	0	-2.79577	-0.285014	23.0112	0.000282839	0.0504711	Cyp2a5
634104	29.6	306	-3.84895	0.248821	60.2753	2.53e-06	0.00365219	Olfr287
13108	0	0	-5.16549	-1.6984	34.6242	7.27e-06	0.00656818	Cyp2g1
