# Supplementary material for: Shank3 modulates sleep and expression of circadian transcription factors
Source: eLife journal article supplement (doi:10.7554/elife.42819), 2019-04-11
Supplement: supp [file elife-42819-supp-v1.zip › elife_poa_e42819_Figure_5_figure_supplement_1.pdf]

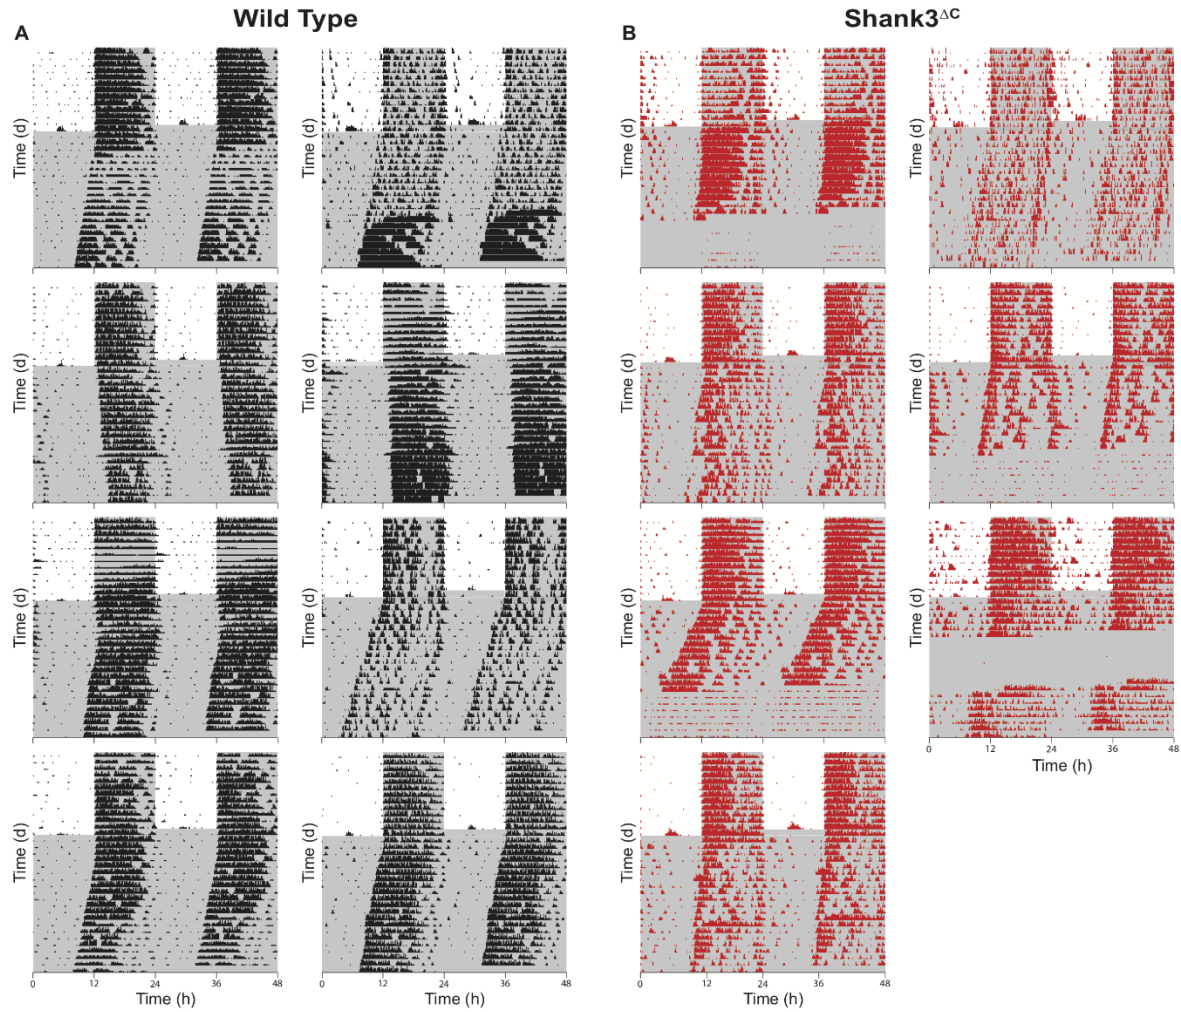

**Figure 5 – figure supplement 1.** Actograms for all wild type and Shank3<sup>ΔC</sup> mice. Mice were entrained to a 12:12 h light:dark cycle (LD, 559 ± 4 : 0 ± 0 lux) for two weeks prior to 3 weeks constant darkness (DD, 0 ± 0 lux). Gray shading is representative of the dark period. **(A)** Actograms for wild type mice (n = 8). **(B)** Actograms for Shank3<sup>ΔC</sup> mice (n = 7).
