# Supplementary material for: Shank3 modulates sleep and expression of circadian transcription factors
Source: eLife journal article supplement (doi:10.7554/elife.42819), 2019-04-11
Supplement: supp [file elife-42819-supp-v1.zip › elife_poa_e42819_Supplementary_file_1.pdf]

|           | <i>Wild Type</i>             | <i>Shank3<sup>ΔC</sup></i> |
|-----------|------------------------------|----------------------------|
|           | <i>Period (h)*</i>           |                            |
| LD Week 1 | 24.0 ± 0.0                   | 21.3 ± 2.7                 |
| LD Week 2 | 24.0 ± 0.0                   | 23.9 ± 0.1                 |
| LD Week 3 | 24.0 ± 0.0                   | 24.2 ± 0.9                 |
| LD Week 4 | 24.0 ± 0.0                   | 24.0 ± 0.0                 |
| LD Week 5 | 24.0 ± 0.1                   | 24.1 ± 0.1                 |
|           | <i>Alpha (h)<sup>†</sup></i> |                            |
| LD Week 1 | 9.8 ± 0.6                    | 8.2 ± 0.7                  |
| LD Week 2 | 10.0 ± 0.5                   | 8.2 ± 0.7                  |
| LD Week 3 | 9.7 ± 0.5                    | 8.3 ± 0.9                  |
| LD Week 4 | 9.1 ± 0.5                    | 8.8 ± 0.7                  |
| LD Week 5 | 10.1 ± 0.6                   | 9.0 ± 0.7                  |
|           | <i>Activity (rev/day)</i>    |                            |
| LD Week 1 | 39298.0 ± 1517.1             | 14509.7 ± 1273.4           |
| LD Week 2 | 42867.1 ± 550.2              | 15256.3 ± 414.8            |
| LD Week 3 | 40513.3 ± 819.3              | 20229.9 ± 1424.4           |
| LD Week 4 | 37703.6 ± 325.1              | 26488.7 ± 1180.3           |
| LD Week 5 | 40210.9 ± 549.5              | 28560.9 ± 1545.7           |
|           | <b>p &lt; 0.0001</b>         |                            |

**Supplementary file 1.** Wheel-running behavior in Shank3<sup>ΔC</sup> mice across 5 weeks of continuous light:dark (LD) cycles. Summary of wheel-running behavior measured for each week of 12:12 h light:dark cycles for both wild type and Shank3<sup>ΔC</sup> mice. A linear mixed-effects ANOVA was used to estimate the contributions of genotype and the interaction between genotype and time for period, alpha, and wheel-running activity for LD week 1 through 5. There is no significant interaction effect for genotype x time for period ( $p = 0.41$ ), but there is a significant effect of genotype ( $p = 0.047$ , indicated by \*). There is no significant interaction effect for genotype x time for alpha ( $p = 0.43$ ), but there is a significant effect of time ( $p = 0.004$ , indicated by <sup>†</sup>). There is a significant interaction effect (indicated by vertical bar) for genotype x time for activity ( $p < 0.0001$ ). See Supplementary file 1 – source data 1 for details. Values are means ± SEM for wild type ( $n = 8$ ) and Shank3<sup>ΔC</sup> ( $n = 8$ ) mice.
