# Supplementary material for: Shank3 modulates sleep and expression of circadian transcription factors
Source: eLife journal article supplement (doi:10.7554/elife.42819), 2019-04-11
Supplement: supp [file elife-42819-supp-v1.zip › elife_poa_e42819_Supplementary_file_1_source_data_1.xlsx]

## Sheet: LD Weeks 1 - 5 Wheel-Running
	numDF	denDF	F-value	p-value
Period
(Intercept)	1	56	567.72	<0.0001
Week	4	56	2.02	0.11
Genotype	1	14	4.76	0.047
Genotype x Week	4	56	1.03	0.41
Alpha
(Intercept)	1	590	412.8	<0.0001
Time	1	590	8.5	0.004
Genotype	1	14	3.2	0.1
Genotype x Time	1	590	0.64	0.43
Activity
(Intercept)	1	542	60.48	<0.0001
Time	1	542	4.21	0.04
Genotype	1	14	6.87	0.02
Genotype x Time	1	542	85.99	<0.0001
