# Supplementary material for: Shank3 modulates sleep and expression of circadian transcription factors
Source: eLife journal article supplement (doi:10.7554/elife.42819), 2019-04-11
Supplement: supp [file elife-42819-supp-v1.zip › elife_poa_e42819_Table_2_source_data_1.xlsx]

## Sheet: Shank3vWT_HC_FDR0.1
UP
Annotation Cluster 1: Cholesterol Metabolism	Enrichment Score: 1.9
Category	Term	Count	PValue	Genes	Gene Names	List Total	Pop Hits	Pop Total	Fold Enrichment
UP_KEYWORDS	Cholesterol metabolism	3	0.00671483	15357, 231070, 16835	Hmgcr, Insig1, Ldlr	36	48	13625	23.6545
UP_KEYWORDS	Sterol metabolism	3	0.00784299	15357, 231070, 16835	Hmgcr, Insig1, Ldlr	36	52	13625	21.8349
UP_KEYWORDS	Steroid metabolism	3	0.00936459	15357, 231070, 16835	Hmgcr, Insig1, Ldlr	36	57	13625	19.9196
GOTERM_BP_DIRECT	GO:0008202~steroid metabolic process	3	0.0104839	15357, 231070, 16835	Hmgcr, Insig1, Ldlr	32	59	11758	18.6833
GOTERM_BP_DIRECT	GO:0008203~cholesterol metabolic process	3	0.0126208	15357, 231070, 16835	Hmgcr, Insig1, Ldlr	32	65	11758	16.9587
UP_KEYWORDS	Ubl conjugation	8	0.049114	73826, 15357, 231070, 16476, 14284, 11984, 18030, 16835	Poldip3, Hmgcr, Insig1, Jun, Fosl2, Atp6v0c, Nfil3, Ldlr	36	1329	13625	2.27824
Annotation Cluster 2: Transcription	Enrichment Score: 1.2
Category	Term	Count	PValue	Genes	Gene Names	List Total	Pop Hits	Pop Total	Fold Enrichment
GOTERM_BP_DIRECT	GO:0006366~transcription from RNA polymerase II promoter	3	0.0343749	16476, 14284, 18030	Jun, Fosl2, Nfil3	32	111	11758	9.93074
GOTERM_BP_DIRECT	GO:0045944~positive regulation of transcription from RNA polymerase II promoter	6	0.0436892	20849, 433586, 20677, 11516, 16476, 14284	Stat4, Maml3, Sox4, Adcyap1, Jun, Fosl2	32	746	11758	2.95526
UP_KEYWORDS	Ubl conjugation	8	0.049114	73826, 15357, 231070, 16476, 14284, 11984, 18030, 16835	Poldip3, Hmgcr, Insig1, Jun, Fosl2, Atp6v0c, Nfil3, Ldlr	36	1329	13625	2.27824
GOTERM_MF_DIRECT	GO:0000977~RNA polymerase II regulatory region sequence-specific DNA binding	3	0.0668515	20849, 14284, 18030	Stat4, Fosl2, Nfil3	33	150	11315	6.85758
GOTERM_MF_DIRECT	GO:0043565~sequence-specific DNA binding	4	0.08621	20849, 16476, 14284, 18030	Stat4, Jun, Fosl2, Nfil3	33	371	11315	3.69681
GOTERM_MF_DIRECT	GO:0003700~transcription factor activity, sequence-specific DNA binding	5	0.0967988	20849, 20677, 16476, 14284, 18030	Stat4, Sox4, Jun, Fosl2, Nfil3	33	623	11315	2.75184
DOWN
Annotation Cluster 1: MAPK	Enrichment Score: 1.7
Category	Term	Count	PValue	Genes	Gene Names	List Total	Pop Hits	Pop Total	Fold Enrichment
KEGG_PATHWAY	mmu04010:MAPK signaling pathway	4	0.00614339	26417, 13712, 286940, 19418	Mapk3, Elk1, Flnb, Rasgrf2	13	253	7720	9.38887
KEGG_PATHWAY	mmu05205:Proteoglycans in cancer	3	0.0381844	26417, 13712, 286940	Mapk3, Elk1, Flnb	13	203	7720	8.77605
KEGG_PATHWAY	mmu04510:Focal adhesion	3	0.0395712	26417, 13712, 286940	Mapk3, Elk1, Flnb	13	207	7720	8.60647
Annotation Cluster 2: Circadiam ryhtms	Enrichment Score: 1.6
Category	Term	Count	PValue	Genes	Gene Names	List Total	Pop Hits	Pop Total	Fold Enrichment
UP_KEYWORDS	Biological rhythms	3	0.0128159	21685, 217082, 18628	Tef, Hlf, Per3	32	126	22680	16.875
GOTERM_BP_DIRECT	GO:0048511~rhythmic process	3	0.0178178	21685, 217082, 18628	Tef, Hlf, Per3	30	128	18082	14.1266
GOTERM_BP_DIRECT	GO:0006351~transcription, DNA-templated	7	0.0748444	54006, 21685, 217082, 26417, 13712, 231148, 18628	Deaf1, Tef, Hlf, Mapk3, Elk1, Ablim2, Per3	30	1885	18082	2.23827
Annotation Cluster 3: Transcription	Enrichment Score: 1.7
Category	Term	Count	PValue	Genes	Gene Names	List Total	Pop Hits	Pop Total	Fold Enrichment
UP_KEYWORDS	Cytoplasm	14	0.00333332	16581, 215707, 69440, 286940, 231148, 66725, 54006, 14860, 26417, 13199, 238384, 19418, 269615, 18628	Gclc, Ccdc92, Dennd6b, Flnb, Ablim2, Lrrk2, Deaf1, Gsta4, Mapk3, Ccnb3, Slc24a4, Rasgrf2, Plch2, Klhl23	32	4404	22680	2.25307
GOTERM_BP_DIRECT	GO:0045944~positive regulation of transcription from RNA polymerase II promoter	6	0.0197086	54006, 21685, 26417, 13199, 13712, 231148	Deaf1, Tef, Mapk3, Ddn, Elk1, Ablim2	30	995	18082	3.63457
UP_KEYWORDS	Phosphoprotein	17	0.0289147	21941, 19944, 269589, 21685, 320506, 231148, 286940, 66725, 20190, 54006, 26417, 13199, 13712, 19418, 76795, 269615, 18628	Tnfrsf8, Rpl29, Styl1, Tef, Lmbrd2, Ablim2, Flnb, Lrrk2, Ryr1, Deaf1, Mapk3, Ddn, Elk1, Rasgrf2, Tbc1d9b, Plch2, Per3	32	7617	22680	1.58182
GOTERM_BP_DIRECT	GO:0006351~transcription, DNA-templated	7	0.0748444	54006, 21685, 217082, 26417, 13712, 231148, 18628	Deaf1, Tef, Hlf, Mapk3, Elk1, Ablim2, Per3	30	1885	18082	2.23827
Background: genes Detected by RNA seq in Mouse cortex
EASE cutoff: 0.1, Enrichment score >1.2 (average EASE >0.05)
Lowest clustering stringency (more inclusvie clustering)

## Sheet: Shank3vWT_SD_FDR0.1
UP
Annotation Cluster 1: Potassium Ion Transport	Enrichment Score: 1.5
Category	Term	Count	PValue	Genes	Gene Names	List Total	Pop Hits	Pop Total	Fold Enrichment
GOTERM_BP_DIRECT	GO:0006811~ion transport	7	0.00844404	105722, 14057, 67498, 16526, 16525, 57780, 69847	Ano6, Sfxn1, Kcnv1, Kcnk2, Kcnk1, Fxyd7, Zfp831	50	429	11758	3.83711
UP_KEYWORDS	Ion channel	5	0.0172297	105722, 67498, 16526, 16525, 57780	Ano6, Kcnv1, Kcnk2, Kcnk1, Fxyd7	56	246	13625	4.94519
UP_KEYWORDS	Potassium channel	3	0.0221603	67498, 16526, 16525	Kcnv1, Kcnv1, Kcnk1	56	57	13625	12.8055
GOTERM_MF_DIRECT	GO:0005267~potassium channel activity	3	0.0303407	67498, 16526, 16525	Kcnv1, Kcnv1, Kcnk1	50	63	11315	10.7762
UP_KEYWORDS	Ion transport	6	0.0348902	105722, 14057, 67498, 16526, 16525, 57780	Ano6, Sfxn1, Kcnv1, Kcnk2, Kcnk1, Fxyd7	56	451	13625	3.23685
GOTERM_BP_DIRECT	GO:0071805~potassium ion transmembrane transport	3	0.0389316	67498, 16526, 16525	Kcnv1, Kcnv1, Kcnk1	50	75	11758	9.4064
UP_KEYWORDS	Potassium transport	3	0.0501191	67498, 16526, 16525	Kcnv1, Kcnv1, Kcnk1	56	89	13625	8.20124
UP_KEYWORDS	Potassium	3	0.0616142	67498, 16526, 16525	Kcnv1, Kcnv1, Kcnk1	56	100	13625	7.29911
GOTERM_BP_DIRECT	GO:0006813~potassium ion transport	3	0.0650672	67498, 16526, 16525	Kcnv1, Kcnv1, Kcnk1	50	100	11758	7.0548
Annotation Cluster 2: Dephosphorylation	Enrichment Score: 1.2
Category	Term	Count	PValue	Genes		List Total	Pop Hits	Pop Total	Fold Enrichment
GOTERM_MF_DIRECT	GO:0004725~protein tyrosine phosphatase activity	3	0.0544521	63953, 72349, 19271	Dusp10, Dusp3, Ptprj	50	87	11315	7.80345
GOTERM_BP_DIRECT	GO:0016311~dephosphorylation	3	0.0561802	63953, 72349, 19271	Dusp10, Dusp3, Ptprj	50	92	11758	7.66826
GOTERM_MF_DIRECT	GO:0016791~phosphatase activity	3	0.0732296	63953, 72349, 19271	Dusp10, Dusp3, Ptprj	50	103	11315	6.59126
UP_KEYWORDS	Protein phosphatase	3	0.0821154	63953, 72349, 19271	Dusp10, Dusp3, Ptprj	56	118	13625	6.18568
GOTERM_BP_DIRECT	GO:0006470~protein dephosphorylation	3	0.0954974	63953, 72349, 19271	Dusp10, Dusp3, Ptprj	50	125	11758	5.64384
Annotation Cluster 3: Neuron projection development	Enrichment Score: 1.4
Category	Term	Count	PValue	Genes		List Total	Pop Hits	Pop Total	Fold Enrichment
UP_KEYWORDS	Glycoprotein	20	0.00126555	12843, 12805, 105722, 53625, 16526, 16525, 19271, 68498, 22353, 330941, 105827, 18212, 20346, 100503659, 15357, 19699, 14313, 11434, 223827, 14412	Col1a2, Cntn1, Ano6, B3gnt2, Kcnk2, Kcnk1, Ptprj, Tspan11, Vip, AI593442, Amigo2, Ntrk2, Sema3a, Cbarp, Hmgcr, Reln, Fst, Arc, Gxylt1, Slc6a13	56	2320	13625	2.09744
UP_KEYWORDS	Disulfide bond	14	0.00872099	12843, 12805, 20604, 18610, 26570, 16526, 16525, 105827, 18212, 20346, 19699, 14313, 11434, 14412	Col1a2, Cntn1, Sst, Pdyn, Slc7a11, Kcnk2, Amigo2, Ntrk2, Sema3a, Reln, Fst, Arc, Slc6a13	56	1577	13625	2.15996
UP_KEYWORDS	Cell adhesion	5	0.0608829	105827, 12805, 19699, 18003, 240185	Amigo2, Cntn1, Reln, Nedd9, Jcad	56	368	13625	3.30576
GOTERM_BP_DIRECT	GO:0001764~neuron migration	3	0.0662097	18212, 20346, 19699	Ntrk2, Sema3a, Reln	50	101	11758	6.98495
GOTERM_BP_DIRECT	GO:0007155~cell adhesion	5	0.0740958	105827, 12805, 19699, 18003, 240185	Amigo2, Cntn1, Reln, Nedd9, Jcad	50	382	11758	3.07801
UP_KEYWORDS	Secreted	7	0.0821573	12843, 20604, 20346, 18610, 19699, 14313, 22353	Col1a2, Sst, Sema3a, Pdyn, Reln, Fst, Vip	56	754	13625	2.25879
UP_KEYWORDS	Immunoglobulin domain	4	0.0859405	105827, 12805, 18212, 20346	Amigo2, Cntn1, Ntrk2, Sema3a	56	258	13625	3.77215
GOTERM_BP_DIRECT	GO:0010976~positive regulation of neuron projection development	3	0.0903863	12805, 18212, 19699	Cntn1, Ntrk2, Sema3a	50	121	11758	5.83041
UP_KEYWORDS	Signal	14	0.0909295	12843, 12805, 20604, 18610, 72590, 19271, 22353, 330941, 105827, 18212, 20346, 19699, 14313, 11434	Col1a2, Cntn1, Sst, Pdyn, Ppme1, Ptprj, Vip, AI593442, Amigo2, Ntrk2, Sema3a, Reln, Fst, Acr	56	2181	13625	1.56178
DOWN
Annotation Cluster 1: GnRH signalling	Enrichment Score: 1.5
Category	Term	Count	PValue	Genes		List Total	Pop Hits	Pop Total	Fold Enrichment
KEGG_PATHWAY	mmu05140:Leishmaniasis	3	0.0140466	19094, 26413, 13712	Mapk11, Mapk1, Elk1	23	64	7720	15.7337
KEGG_PATHWAY	mmu04912:GnRH signaling pathway	3	0.0255974	19094, 26413, 13712	Mapk11, Mapk1, Elk1	23	88	7720	11.4427
GOTERM_BP_DIRECT	GO:0006351~transcription, DNA-templated	12	0.0716915	19094, 26413, 67155, 21685, 217082, 13712, 217166, 79362, 223828, 56233, 19009, 18628	Mapk11, Mapk1, Smarca2, Tef, Hlf, Elk1, Nr1d1, Bhlhe41, Pphln1, Hdac7, Pou6f1, Per3	66	1885	18082	1.7441
Annotation Cluster 2: Circadian rhythms	Enrichment Score: 2.0
Category	Term	Count	PValue	Genes		List Total	Pop Hits	Pop Total	Fold Enrichment
KEGG_PATHWAY	mmu04710:Circadian rhythm	4	8.5753e-05	217166, 79362, 108097, 18628	Nr1d1, Bhlhe41, Prkab2, Per3	23	31	7720	43.31
UP_KEYWORDS	Biological rhythms	5	0.000697791	21685, 217082, 217166, 79362, 18628	Tef, Hlf, Nr1d1, Bhlhe41, Per3	73	126	22680	12.3288
GOTERM_BP_DIRECT	GO:0048511~rhythmic process	5	0.0011618	21685, 217082, 217166, 79362, 18628	Tef, Hlf, Nr1d1, Bhlhe41, Per3	66	128	18082	10.7019
GOTERM_BP_DIRECT	GO:0007623~circadian rhythm	4	0.00691988	17777, 217166, 79362, 18628	Mttp, Nr1d1, Bhlhe41, Per3	66	108	18082	10.147
GOTERM_BP_DIRECT	GO:0032922~circadian regulation of gene expression	3	0.0203199	217166, 79362, 18628	Nr1d1, Bhlhe41, Per3	66	61	18082	13.4739
GOTERM_MF_DIRECT	GO:0000978~RNA polymerase II core promoter proximal region sequence-specific DNA binding	5	0.0367748	21685, 13199, 13712, 217166, 79362	Tef, Ddn, Elk1, Nr1d1, Bhlhe41	62	359	17446	3.91904
GOTERM_MF_DIRECT	GO:0000977~RNA polymerase II regulatory region sequence-specific DNA binding	4	0.0422053	21685, 217082, 217166, 19009	Tef, Hlf, Nr1d1, Pou6F1	62	221	17446	5.09298
UP_KEYWORDS	Transcription regulation	11	0.0572399	19094, 67155, 21685, 217082, 13712, 217166, 79362, 223828, 56233, 19009, 18628	Mapk11, Smarca2, Tef, Hlf, Elk1, Nr1d1, Bhlhe41, Pphln1, Hdac7, Pou6f1, Per3	73	1799	22680	1.89969
UP_KEYWORDS	Transcription	11	0.0683657	19094, 67155, 21685, 217082, 13712, 217166, 79362, 223828, 56233, 19009, 18628	Mapk11, Smarca2, Tef, Hlf, Elk1, Nr1d1, Bhlhe41, Pphln1, Hdac7, Pou6f1, Per3	73	1859	22680	1.83837
GOTERM_MF_DIRECT	GO:0043565~sequence-specific DNA binding	6	0.069975	21685, 217082, 13712, 217166, 100043757, 19009	Tef, Hlf, Elk1, Nr1d1, Zfp831, Pou6f1	62	633	17446	2.66718
GOTERM_BP_DIRECT	GO:0006351~transcription, DNA-templated	12	0.0716915	19094, 26413, 67155, 21685, 217082, 13712, 217166, 79362, 223828, 56233, 19009, 18628	Mapk11, Mapk1, Smarca2, Tef, Nr1d1, Bhlhe41, Pphln1, Hdac7, Pou6f1, Per3	66	1885	18082	1.7441
Annotation Cluster 3: Sodium transport	Enrichment Score: 1.3
Category	Term	Count	PValue	Genes		List Total	Pop Hits	Pop Total	Fold Enrichment
UP_KEYWORDS	Symport	3	0.0486081	103098, 238384, 30805	Slc6a15, Slc24a4, Slc22a4	73	111	22680	8.39689
UP_KEYWORDS	Glycoprotein	19	0.0496454	56219, 71733, 140570, 319480, 74720, 18164, 216881, 103534, 103098, 17181, 380967, 320563, 238384, 30805, 263764, 26874, 109901, 244954, 74782	Extl1, Susd2, Plxnb2, Itga11, Tmem114, Nptx1, Wscd1, Mgat4b, Slc6a15, Matn2, Tmem106c, Islr2, Slc24a4, Slc22a4, Creg2, Abcd2, Cela1, Prss35, Glt8d2	73	3815	22680	1.54732
UP_KEYWORDS	Sodium transport	3	0.0501817	103098, 238384, 30805	Slc6a15, Slc24a4, Slc22a4	73	113	22680	8.24827
UP_KEYWORDS	Sodium	3	0.0558318	103098, 238384, 30805	Slc6a15, Slc24a4, Slc22a4	73	120	22680	7.76712
GOTERM_MF_DIRECT	GO:0015293~symporter activity	3	0.0585103	103098, 238384, 30805	Slc6a15, Slc24a4, Slc22a4	62	112	17446	7.53715
GOTERM_BP_DIRECT	GO:0006814~sodium ion transport	3	0.0733863	103098, 238384, 30805	Slc6a15, Slc24a4, Slc22a4	66	124	18082	6.6283
Background: genes Detected by RNA seq in Mouse cortex
EASE cutoff: 0.1, Enrichment score >1.3 (average EASE >0.05)
Lowest clustering stringency (more inclusvie clustering)
