# Supplementary material for: Shank3 modulates sleep and expression of circadian transcription factors
Source: eLife journal article supplement (doi:10.7554/elife.42819), 2019-04-11
Supplement: supp [file elife-42819-supp-v1.zip › elife_poa_e42819_Table_3_source_data_1.xlsx]

## Sheet: Table 3 - source data 1
	numDF	denDF	F-value	p-value
Period
(Intercept)	1	39	351.35	<0.0001
Week	3	39	3.36	0.03
Genotype	1	13	0.01	0.94
Genotype x Week	3	39	1.9	0.15
Alpha
(Intercept)	1	373	909.26	<0.0001
Time	1	373	2.17	0.14
Genotype	1	13	2.12	0.17
Genotype x Time	1	373	0.02	0.88
Activity
(Intercept)	1	388	52.83	<0.0001
Time	1	388	0.33	0.57
Genotype	1	13	6.77	0.02
Genotype x Time	1	338	30.96	<0.0001
